# Supplementary material for: Rh-Catalyzed diastereo- and linear-selective α-allylation of chiral cycloenamines
Source: Royal Society of Chemistry journal article supplement (doi:10.1039/d0qo01087a), 2020-01-01
Supplement: d0qo01087a1.pdf [file d0qo01087a1.pdf]

## **Diastereoselective Rh-Catalyzed $\alpha$ -Allylation of Chiral Cycloenamines Provides Unusual Linear Regional Selectivity**

Xiaoji Wang,<sup>a, #, \*</sup> Yunhao Luo,<sup>b, #</sup> Shuanglin Qin,<sup>c, #</sup> Yue Sun,<sup>b</sup> Ning Wang,<sup>b</sup> Jun Yan,<sup>d,</sup>  
\* Guang Yang,<sup>b, \*</sup>

<sup>a</sup> The State Key Laboratory of Medicinal Chemical Biology, College of Pharmacy, Nankai University, Tianjin 300071, People's Republic of China.

<sup>b</sup> School of pharmacy, Hubei University of Science and Technology, Xianning, 437100, China.

<sup>c</sup> School of Chemistry and Chemical Engineering, Central South University, Changsha 410083, People's Republic of China.

<sup>d</sup> Engineering Research Center of Health Food Design & Nutrition Regulation, School of Chemical Engineering and Energy Technology, Dongguan University of Technology, Dongguan 523808, Guangdong Province, P. R.China.

---

## Contents of supporting information

|                                                                                               |    |
|-----------------------------------------------------------------------------------------------|----|
| 1. General Information.....                                                                   | 3  |
| 2. Synthesis of Substrates <b>1a-1i</b> .....                                                 | 3  |
| 3. Rh-catalyzed Intermolecular Decarboxylative Allylation of $\beta$ -Sulfinimine Ester ..... | 7  |
| 4. Preparation $\beta$ -amino acid <b>21</b> from product <b>13</b> .....                     | 29 |
| 5. NMR Spectrums of Compounds .....                                                           | 31 |
| 6. Crystal data of Compound <b>21</b> .....                                                   | 88 |

---

## 1. General Information

All reactions were carried out under an argon atmosphere with dry, freshly distilled solvents under anhydrous conditions, unless otherwise noted. Yields refer to chromatographically and spectroscopically ( $^1\text{H}$  NMR) homogeneous materials, unless otherwise stated. The used solvents were purified and dried according to common procedures. Other chemicals and solvents were commercially available. High-resolution mass spectra (HRMS) were obtained with a FTICR-MS (Ion spec 7.0T) spectrometer.  $^1\text{H}$  NMR spectra were obtained by using a Bruker AV 400 or AV 600. Chemical shifts are reported in parts per million (ppm) relative to either a tetramethylsilane internal standard or solvent signals. Data are reported as follows: chemical shift, multiplicity (s = singlet, d = doublet, t = triplet, q = quartet, br = broad, m = multiplet), coupling constants and integration.  $^{13}\text{C}$  NMR spectra were recorded using a Bruker AV 400 spectrometer (100 MHz) using  $\text{CDCl}_3$  as the solvent. Chemical shifts ( $\delta$ ) are reported in parts per million measured relative to the solvent peak. Melting points (m.p.) were obtained on a Mel-Temp capillary melting point apparatus. Enantiomeric excess (ee) was determined using Agilent HPLC 1260. IR spectra were recorded with a Bio-Rad FTS 6000 Fourier infrared spectrometer.

## 2. Synthesis of Substrates 1a-1i

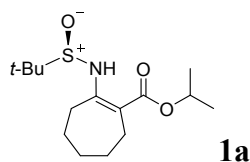

### *Representative Procedure:*

isopropyl (*R*)-2-((*tert*-butylsulfinyl) amino)cyclohept-1-ene-1-carboxylate **1a**:

In a round bottom flask, a solution of cyclic sulfinimine (30 mmol) in fresh distilled THF (150mL) was mixed with NaHMDS (30mL, 2M in THF) in a nitrogen atmosphere at  $-78\text{ }^\circ\text{C}$ . After 1 hour, corresponding isopropyl carbonochloridate (45 mmol) was added dropwise. The mixture was kept stirring at  $-78\text{ }^\circ\text{C}$  for 3 h. After the substrate was completely consumed (monitored by TLC analysis), the reaction mixture was quenched with saturated  $\text{NH}_4\text{Cl}$  (100 mL). The mixture was extracted by ethyl acetate (3 x 100mL). The combined organic phase was dried over  $\text{Na}_2\text{SO}_4$ , and concentrated in *vacuo*. Then the residue was purified by flash column chromatography on silica gel (petroleum ether: ethyl acetate = 5:1) to furnish the desired compound **1a** (8.1 g, 90% yield) as yellow oil;  $[\alpha]_{\text{D}}^{25} = +2.40$  (c 3.0,  $\text{CHCl}_3$ ). IR (KBr)  $\nu_{\text{max}}$ : 2968, 2928, 2348, 1787, 1687, 1577, 1277, 1145, 870.  $\text{cm}^{-1}$ .  $^1\text{H}$  NMR (400 MHz, Chloroform-*d*)  $\delta$  10.99

(s, 1H), 5.02 (m, 1H), 2.77 (m, 2H), 2.47 (ttd,  $J = 15.3, 10.6, 5.4$  Hz, 2H), 1.74 (dd,  $J = 14.6, 6.8$  Hz, 2H), 1.68 – 1.39 (m, 4H), 1.32 (s, 9H), 1.24 (dd,  $J = 6.3, 1.9$  Hz, 6H).  $^{13}\text{C}$  NMR (100 MHz, Chloroform-*d*)  $\delta$  170.0, 160.6, 106.6, 67.3, 56.7, 31.8, 30.5, 26.9, 26.1, 24.9, 22.8, 22.2. HRMS (ESI) calculated for  $\text{C}_{15}\text{H}_{27}\text{NNaO}_3\text{S}^+$   $[\text{M}+\text{Na}]^+$ : 324.1604, found 324.1601.

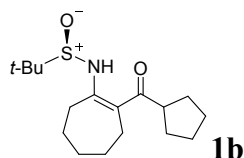

(*R*)-*N*-(2-(cyclopentanecarbonyl)cyclohept-1-en-1-yl)-2-methylpropane-2-sulfinamide  
**1b**:

8.1 g; yield: 87%; yellow oil;  $[\alpha]_{20}^{\text{D}} = +19.62$  (c 1.0,  $\text{CHCl}_3$ ). IR (KBr)  $\nu_{\text{max}}$ : 2968, 2920, 2850, 2383, 2360, 1737, 1607, 1260, 800.  $\text{cm}^{-1}$ .  $^1\text{H}$  NMR (400 MHz, Chloroform-*d*)  $\delta$  13.03 (s, 1H), 3.09 – 3.02 (m, 1H), 2.85 – 2.66 (m, 2H), 2.47 (dd,  $J = 7.4, 3.5$  Hz, 2H), 1.71 (d,  $J = 5.0$  Hz, 2H), 1.68 – 1.45 (m, 11H), 1.32 – 1.22 (m, 9H), 1.17 – 1.15 (m, 1H).  $^{13}\text{C}$  NMR (100 MHz, Chloroform-*d*)  $\delta$  204.7, 162.7, 113.5, 56.5, 47.5, 31.2, 30.3, 29.7, 27.2, 26.1, 26.1, 24.7, 22.6. HRMS (ESI) calculated for  $\text{C}_{17}\text{H}_{29}\text{NNaO}_2\text{S}^+$   $[\text{M}+\text{Na}]^+$ : 334.1811, found 334.1815.

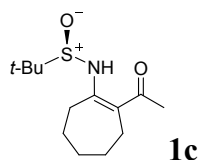

(*R*)-*N*-(2-acetylcyclohept-1-en-1-yl)-2-methylpropane-2-sulfinamide **1c**:

6.3 g; yield: 82%; yellow oil;  $[\alpha]_{24}^{\text{D}} = +4.94$  (c 1.1,  $\text{CHCl}_3$ ). IR (KBr)  $\nu_{\text{max}}$ : 2961, 2924, 2854, 1610, 1446, 1395, 1361, 1250, 1210, 1092, 961, 846, 686, 586  $\text{cm}^{-1}$ .  $^1\text{H}$  NMR (400 MHz, Chloroform-*d*)  $\delta$  13.01 (s, 1H), 2.86 – 2.77 (m, 2H), 2.47 (dd,  $J = 6.1, 4.8$  Hz, 2H), 2.20 (s, 3H), 1.75 (m, 4H), 1.60 – 1.52 (m, 2H), 1.32 (s, 9H).  $^{13}\text{C}$  NMR (100 MHz, Chloroform-*d*)  $\delta$  200.2, 163.4, 113.8, 56.9, 31.5, 30.4, 29.2, 28.3, 27.0, 24.9, 22.8. HRMS (ESI) calculated for  $\text{C}_{13}\text{H}_{23}\text{NNaO}_2\text{S}^+$   $[\text{M}+\text{Na}]^+$ : 280.1342, found 280.1346.

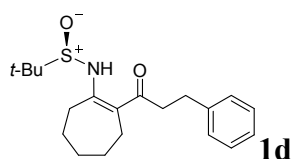

(*R*)-2-methyl-N-(2-(3-phenylpropanoyl) cyclohept-1-en-1-yl)propane-2-sulfinamide

**1d:**

8.3 g; yield: 80%; yellow oil;  $[\alpha]_{22}^D = +18.07$  (c 0.5,  $\text{CHCl}_3$ ). IR (KBr)  $\nu_{\text{max}}$ : 2925, 2854, 1749, 1615, 1507, 1456, 1362, 1091, 750, 699  $\text{cm}^{-1}$ .  $^1\text{H}$  NMR (400 MHz, Chloroform-*d*)  $\delta$  13.04 (s, 1H), 7.29 (d,  $J = 6.6$  Hz, 2H), 7.22 – 7.17 (m, 3H), 2.89 (dt,  $J = 7.5, 3.4$  Hz, 2H), 2.81 (q,  $J = 9.4, 8.9$  Hz, 4H), 2.47 (q,  $J = 5.1, 4.1$  Hz, 2H), 1.78 – 1.71 (m, 3H), 1.59 – 1.44 (m, 3H), 1.35 (s, 9H).  $^{13}\text{C}$  NMR (100 MHz, Chloroform-*d*)  $\delta$  201.1, 163.5, 141.7, 128.6, 128.5, 126.1, 113.6, 56.9, 42.7, 31.5, 31.1, 30.5, 27.4, 27.2, 24.9, 22.8. HRMS (ESI) calculated for  $\text{C}_{20}\text{H}_{29}\text{NNaO}_2\text{S}^+$   $[\text{M}+\text{Na}]^+$ : 370.1811, found 370.1817.

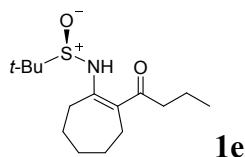

(*R*)-N-(2-butylcyclohept-1-en-1-yl)-2-methylpropane-2-sulfinamide **1e**:

7.0 g; yield: 82%; yellow oil;  $[\alpha]_{21}^D = +9.34$  (c 1.2,  $\text{CHCl}_3$ ). IR (KBr)  $\nu_{\text{max}}$ : 2958, 2920, 2349, 1710, 1612, 1458, 1260, 1082, 809.  $\text{cm}^{-1}$ .  $^1\text{H}$  NMR (400 MHz, Chloroform-*d*)  $\delta$  13.08 (s, 1H), 2.81 (d,  $J = 9.0$  Hz, 2H), 2.46 (m, 4H), 1.75 (s, 4H), 1.60 – 1.51 (m, 4H), 1.33 (s, 9H), 0.93 (t,  $J = 6.4$  Hz, 3H).  $^{13}\text{C}$  NMR (100 MHz, Chloroform-*d*)  $\delta$  202.5, 163.1, 113.7, 56.8, 42.8, 31.5, 30.4, 27.5, 27.2, 24.9, 22.8, 18.5, 14.1. HRMS (ESI) calculated for  $\text{C}_{15}\text{H}_{27}\text{NNaO}_2\text{S}^+$   $[\text{M}+\text{Na}]^+$ : 308.1655, found 308.1652.

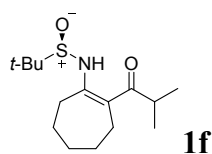

(*R*)-N-(2-isobutyrylcyclohept-1-en-1-yl)-2-methylpropane-2-sulfinamide **1f**:

7.6 g, yield: 89%, yellow oil.  $[\alpha]_{22}^D = +7.25$  (c 4.2,  $\text{CHCl}_3$ ). IR (KBr)  $\nu_{\text{max}}$ : 2974, 2928, 2867, 2852, 1596, 1539, 1466, 1448, 1399, 1368, 1232, 1203, 1089, 1014, 969, 840, 827, 799  $\text{cm}^{-1}$ .  $^1\text{H}$  NMR (400 MHz, Chloroform-*d*)  $\delta$  13.13 (s, 1H), 2.95 (q,  $J = 6.9$  Hz, 1H), 2.79 (t,  $J = 7.7$  Hz, 2H), 2.47 (dt,  $J = 6.4, 2.6$  Hz, 2H), 1.71 (q,  $J = 8.5, 7.1$  Hz, 3H), 1.52 (td,  $J = 15.9, 13.2, 7.7$  Hz, 3H), 1.30 (s, 9H), 1.01 (d,  $J = 6.8$  Hz, 6H).  $^{13}\text{C}$  NMR (100 MHz, Chloroform-*d*)  $\delta$  206.2, 163.6, 112.9, 56.7, 35.9, 31.3, 30.4, 27.5, 27.2, 24.8, 22.8, 19.2, 19.1. HRMS (ESI) calculated for  $\text{C}_{15}\text{H}_{27}\text{NNaO}_2\text{S}^+$   $[\text{M}+\text{Na}]^+$ : 308.1655, found 308.1657.

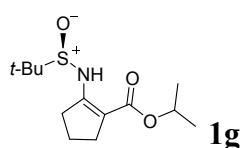

isopropyl (*R*)-2-((*tert*-butylsulfinyl) amino)cyclopent-1-ene-1-carboxylate **1g**:

7.8 g; yield: 95%; yellow oil;  $[\alpha]_{24}^D = -26.11$  (c 2.4, CHCl<sub>3</sub>). IR (KBr)  $\nu_{\max}$ : 2964, 2924, 2340, 1680, 1579, 1279, 961, 870. cm<sup>-1</sup>. <sup>1</sup>H NMR (400 MHz, Chloroform-*d*)  $\delta$  9.20 (s, 1H), 5.03 (m, 1H), 2.93 – 2.84 (m, 1H), 2.64 (ddd,  $J = 17.2, 8.3, 5.9$  Hz, 1H), 2.55 – 2.45 (m, 2H), 1.88 (dtd,  $J = 16.6, 8.3, 6.2$  Hz, 2H), 1.29 (s, 9H), 1.23 (dd,  $J = 6.3, 1.7$  Hz, 6H). <sup>13</sup>C NMR (100 MHz, Chloroform-*d*)  $\delta$  167.5, 157.2, 104.6, 66.9, 56.7, 32.7, 29.34, 22.5, 22.2, 22.2, 20.6. HRMS (ESI) calculated for C<sub>13</sub>H<sub>23</sub>NNaO<sub>3</sub>S<sup>+</sup> [M+Na]<sup>+</sup>: 296.1291, found 296.1293.

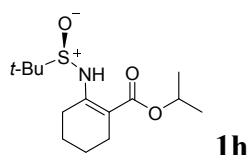

isopropyl (*R*)-2-((*tert*-butylsulfinyl) amino) cyclohex-1-ene-1-carboxylate **1h**:

6.9 g; yield: 80%; yellow oil;  $[\alpha]_{24}^D = -10.78$  (c 0.7, CHCl<sub>3</sub>). IR (KBr)  $\nu_{\max}$ : 2958, 2920, 2360, 1778, 1570, 1276, 877. cm<sup>-1</sup>. <sup>1</sup>H NMR (400 MHz, Chloroform-*d*)  $\delta$  10.78 (s, 1H), 5.02 (dq,  $J = 12.5, 6.2$  Hz, 1H), 2.67 (dt,  $J = 17.7, 6.3$  Hz, 1H), 2.43 (dt,  $J = 17.9, 6.3$  Hz, 1H), 2.24 (dq,  $J = 17.4, 11.2, 8.8$  Hz, 2H), 1.67 (ddd,  $J = 12.8, 6.1, 3.1$  Hz, 2H), 1.57 (qd,  $J = 6.2, 3.2$  Hz, 2H), 1.29 (s, 9H), 1.22 (dd,  $J = 6.2, 2.7$  Hz, 6H). <sup>13</sup>C NMR (100 MHz, Chloroform-*d*)  $\delta$  169.9, 153.1, 101.6, 67.1, 56.4, 27.2, 24.0, 22.8, 22.3, 22.1, 22.0. HRMS (ESI) calculated for C<sub>14</sub>H<sub>25</sub>NNaO<sub>3</sub>S<sup>+</sup> [M+Na]<sup>+</sup>: 310.1447, found 310.1443.

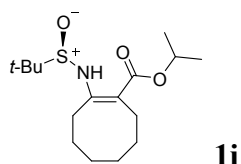

isopropyl (*R, Z*)-2-((*tert*-butylsulfinyl) amino)cyclooct-1-ene-1-carboxylate **1i**:

8.5 g; yield: 90%; yellow oil;  $[\alpha]_{24}^D = -10.09$  (c 5.0, CHCl<sub>3</sub>). IR (KBr)  $\nu_{\max}$ : 2955, 2920, 2358, 1770, 1610, 1576, 1268, 872, 601. cm<sup>-1</sup>. <sup>1</sup>H NMR (400 MHz, Chloroform-*d*)  $\delta$  11.04 (s, 1H), 5.02 (m, 1H), 2.75 (dt,  $J = 8.6, 4.1$  Hz, 2H), 2.44 (ddd,  $J = 14.9, 7.3, 3.1$  Hz, 1H), 2.39 – 2.31 (m, 1H), 1.83 (d,  $J = 8.7$  Hz, 1H), 1.68 – 1.43 (m, 7H), 1.31

(s, 9H), 1.22 (dd,  $J = 6.4, 3.2$  Hz, 6H).  $^{13}\text{C}$  NMR (100 MHz, Chloroform-*d*)  $\delta$  169.9, 156.9, 103.7, 67.0, 56.7, 30.3, 29.3, 28.3, 26.8, 26.3, 25.8, 22.8, 22.1, 22.1. HRMS (ESI) calculated for  $\text{C}_{16}\text{H}_{29}\text{NNaO}_3\text{S}^+$   $[\text{M}+\text{Na}]^+$ : 338.1760, found 338.1763.

### 3. Rh-catalyzed Intermolecular Decarboxylative Allylation of $\beta$ -Sulfinimine Ester

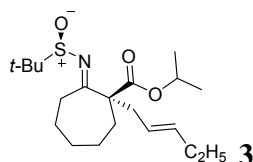

#### Representative Procedure:

isopropyl (*R,E*)-2-(((*R*)-*tert*-butylsulfinyl)imino)-1-((*E*)-pent-2-en-1-yl)cycloheptane-1-carboxylate **3**:

In a round bottom flask, a solution of compound **1** (0.30 g, 1.00 mmol) in fresh distilled THF (5 mL) was mixed with NaHMDS (1 mL, 2M in THF) in a nitrogen atmosphere at room temperature. Then add (*E*)-ethyl pent-2-en-1-yl carbonate (0.32 g, 2.00 mmol) and  $\text{RhCl}(\text{PPh}_3)_3$  (28 mg, 0.03 mmol). The mixture was kept stirring at room temperature overnight. After the substrate was completely consumed (monitored by TLC analysis), the reaction mixture was quenched with saturated  $\text{NH}_4\text{Cl}$  (30 mL), and extracted by ethyl acetate (3 x 30 mL). The combined organic phase was dried over  $\text{Na}_2\text{SO}_4$ , and concentrated in *vacuo*. The residue was purified by flash column chromatography on silica gel (petroleum ether: ethyl acetate=5:1) to furnish the desired compound **3** (335 mg, 91% yield) as a yellow oil.  $[\alpha]_{\text{D}}^{19} = +8.73$  (c 2.2,  $\text{CHCl}_3$ ). IR (KBr)  $\nu_{\text{max}}$ : 2926, 2857, 1730, 1617, 1455, 1386, 1360, 1210, 1190, 1184, 1107, 1082, 969, 801  $\text{cm}^{-1}$ .  $^1\text{H}$  NMR (400 MHz, Chloroform-*d*)  $\delta$  5.49 (dt,  $J = 13.7, 6.3$  Hz, 1H), 5.33 (dt,  $J = 15.0, 7.3$  Hz, 1H), 4.97 (m, 1H), 2.93 (dt,  $J = 11.8, 5.1$  Hz, 1H), 2.75 (dd,  $J = 14.0, 6.5$  Hz, 1H), 2.63 (ddd,  $J = 13.2, 8.3, 4.7$  Hz, 1H), 2.31 (dd,  $J = 14.0, 7.9$  Hz, 1H), 2.11 (dd,  $J = 13.1, 8.7$  Hz, 1H), 1.96 (q,  $J = 7.2$  Hz, 2H), 1.77 – 1.68 (m, 4H), 1.56 (m, 2H), 1.47 – 1.38 (m, 1H), 1.24 (s, 9H), 1.19 (dd,  $J = 6.4, 3.3$  Hz, 6H), 0.93 (t,  $J = 7.5$  Hz, 3H).  $^{13}\text{C}$  NMR (100 MHz, Chloroform-*d*)  $\delta$  187.2, 172.5, 136.4, 124.2, 68.6, 61.6, 57.1, 40.0, 34.3, 33.3, 29.6, 27.1, 25.8, 24.0, 22.5, 21.9, 21.8, 13.8. HRMS (ESI) calculated for  $\text{C}_{20}\text{H}_{35}\text{NNaO}_3\text{S}^+$   $[\text{M}+\text{Na}]^+$ : 392.2230, found 392.2232.

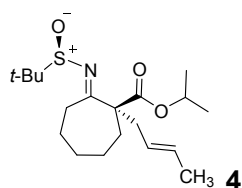

isopropyl (S,E)-1-((E)-but-2-en-1-yl)-2-(((R)-*tert*-butylsulfinyl)imino)cycloheptane-1-carboxylate **4**:

89% yield, yellow oil.  $[\alpha]_{18}^D = +18.54$  (c 0.5,  $\text{CHCl}_3$ ). IR (KBr)  $\nu_{\text{max}}$ : 2926, 2856, 1730, 1617, 1456, 1386, 1374, 1361, 1261, 1220, 1193, 1155, 1106, 1083, 969, 802  $\text{cm}^{-1}$ .  $^1\text{H}$  NMR (400 MHz, Chloroform-*d*)  $\delta$  5.52 – 5.40 (m, 1H), 5.40 – 5.23 (m, 1H), 5.02 – 4.96 (m, 1H), 2.93 (ddd,  $J = 12.9, 6.8, 4.3$  Hz, 1H), 2.75 (ddt,  $J = 13.9, 6.3, 1.4$  Hz, 1H), 2.64 (ddd,  $J = 13.1, 8.8, 4.7$  Hz, 1H), 2.35 – 2.26 (m, 1H), 2.17 – 2.06 (m, 1H), 1.81 – 1.68 (m, 5H), 1.64 – 1.63 (m, 1H), 1.62 – 1.39 (m, 4H), 1.25 (s, 9H), 1.19 (dd,  $J = 6.2, 3.1$  Hz, 6H).  $^{13}\text{C}$  NMR (100 MHz, Chloroform-*d*)  $\delta$  187.2, 172.5, 129.2, 126.5, 68.6, 61.6, 57.1, 40.1, 34.2, 33.3, 29.6, 27.0, 24.0, 23.0, 22.5, 21.9, 21.9, 18.2. HRMS (ESI) calculated for  $\text{C}_{19}\text{H}_{33}\text{NNaO}_3\text{S}^+$   $[\text{M}+\text{Na}]^+$ : 378.2073, found 378.2076.

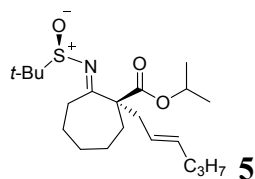

isopropyl (*R,E*)-2-(((*R*)-*tert*-butylsulfinyl)imino)-1-((*E*)-hex-2-en-1-yl)cycloheptane-1-carboxylate **5**:

76% yield, yellow oil.  $[\alpha]_{19}^D = +7.28$  (c 3.3,  $\text{CHCl}_3$ ). IR (KBr)  $\nu_{\text{max}}$ : 2927, 2856, 1730, 1617, 1457, 1386, 1376, 1360, 1210, 1190, 1184, 1107, 1082, 960  $\text{cm}^{-1}$ .  $^1\text{H}$  NMR (400 MHz, Chloroform-*d*)  $\delta$  5.44 (dt,  $J = 14.9, 6.5$  Hz, 1H), 5.37 – 5.23 (m, 1H), 4.96 (m, 1H), 2.91 (ddd,  $J = 12.7, 6.7, 4.4$  Hz, 1H), 2.74 (dd,  $J = 14.0, 6.4$  Hz, 1H), 2.63 (ddd,  $J = 13.2, 8.6, 5.0$  Hz, 1H), 2.30 (dd,  $J = 14.0, 7.7$  Hz, 1H), 2.10 (dd,  $J = 13.3, 8.8$  Hz, 1H), 1.92 (m, 2H), 1.79 – 1.67 (m, 4H), 1.62 – 1.32 (m, 5H), 1.23 (s, 9H), 1.18 (dd,  $J = 6.2, 3.1$  Hz, 6H), 0.84 (t,  $J = 7.4$  Hz, 3H).  $^{13}\text{C}$  NMR (100 MHz, Chloroform-*d*)  $\delta$  187.1, 172.4, 134.7, 125.3, 68.5, 61.6, 57.1, 40.0, 34.8, 34.2, 33.2, 29.6, 27.0, 23.9, 22.6, 22.5, 21.8, 21.8, 13.7. HRMS (ESI) calculated for  $\text{C}_{21}\text{H}_{37}\text{NNaO}_3\text{S}^+$   $[\text{M}+\text{Na}]^+$ : 406.2386, found 406.2382.



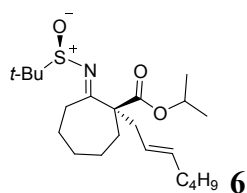

isopropyl (*R,E*)-2-(((*R*)-*tert*-butylsulfinyl)imino)-1-((*E*)-hept-2-en-1-yl)cycloheptane-1-carboxylate **6**:

86% yield, yellow oil.  $[\alpha]_{19}^D = -7.90$  (c 2.3,  $\text{CHCl}_3$ ). IR (KBr)  $\nu_{\text{max}}$ : 2926, 2856, 1731, 1616, 1457, 1386, 1361, 1212, 1189, 1107, 1082, 801  $\text{cm}^{-1}$ .  $^1\text{H}$  NMR (400 MHz, Chloroform-*d*)  $\delta$  5.47 (dt,  $J = 14.0, 6.6$  Hz, 1H), 5.35 (dt,  $J = 14.9, 7.2$  Hz, 1H), 4.99 (m, 1H), 3.05 – 2.87 (m, 1H), 2.77 (dd,  $J = 14.0, 6.4$  Hz, 1H), 2.66 (ddd,  $J = 13.2, 8.3, 5.1$  Hz, 1H), 2.33 (dd,  $J = 14.0, 7.7$  Hz, 1H), 2.13 (dd,  $J = 13.1, 9.0$  Hz, 1H), 1.98 (d,  $J = 6.9$  Hz, 2H), 1.76 (m, 5H), 1.64 – 1.38 (m, 4H), 1.33 – 1.31 (m, 2H), 1.26 (s, 9H), 1.21 (dd,  $J = 6.3, 3.1$  Hz, 6H), 0.88 (t,  $J = 6.8$  Hz, 3H).  $^{13}\text{C}$  NMR (10m, 0 MHz, Chloroform-*d*)  $\delta$  187.2, 172.5, 134.9, 125.1, 68.6, 61.6, 57.1, 40.1, 34.3, 33.2, 32.4, 31.7, 29.6, 27.1, 24.0, 22.5, 22.3, 21.9, 21.8, 14.0. HRMS (ESI) calculated for  $\text{C}_{22}\text{H}_{39}\text{NNaO}_3\text{S}^+$   $[\text{M}+\text{Na}]^+$ : 420.2543, found 420.2548.

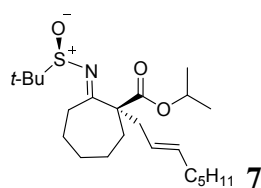

isopropyl (*R,E*)-2-(((*R*)-*tert*-butylsulfinyl)imino)-1-((*E*)-oct-2-en-1-yl)cycloheptane-1-carboxylate **7**:

72% yield, yellow oil.  $[\alpha]_{20}^D = -11.41$  (c 1.1,  $\text{CHCl}_3$ ). IR (KBr)  $\nu_{\text{max}}$ : 2926, 2856, 1730, 1618, 1457, 1386, 1361, 1205, 1182, 1146, 1107, 1082  $\text{cm}^{-1}$ .  $^1\text{H}$  NMR (400 MHz, Chloroform-*d*)  $\delta$  5.46 (dt,  $J = 15.2, 6.5$  Hz, 1H), 5.34 (ddd,  $J = 14.8, 7.8, 6.4$  Hz, 1H), 4.99 (m, 1H), 2.94 (ddd,  $J = 12.8, 6.6, 4.5$  Hz, 1H), 2.77 (dd,  $J = 13.9, 6.4$  Hz, 1H), 2.66 (td,  $J = 8.2, 7.6, 3.7$  Hz, 1H), 2.32 (dd,  $J = 14.0, 7.8$  Hz, 1H), 2.12 (ddd,  $J = 12.3, 8.3, 2.9$  Hz, 1H), 1.96 (m, 2H), 1.80 – 1.69 (m, 4H), 1.61 – 1.28 (m, 9H), 1.26 (s, 9H), 1.20 (dd,  $J = 6.2, 3.2$  Hz, 6H), 0.87 (t,  $J = 6.8$  Hz, 3H).  $^{13}\text{C}$  NMR (100 MHz, Chloroform-*d*)  $\delta$  187.2, 172.5, 135.0, 125.1, 68.6, 61.6, 57.1, 40.0, 34.3, 33.2, 32.7, 31.5, 29.7, 29.2, 27.1, 24.0, 22.6, 22.5, 21.9, 21.8, 14.2. HRMS (ESI) calculated for  $\text{C}_{23}\text{H}_{41}\text{NNaO}_3\text{S}^+$   $[\text{M}+\text{Na}]^+$ : 434.2699, found 434.2698.

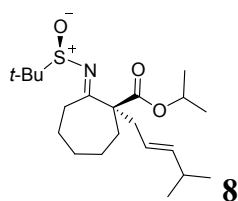

isopropyl (*R,E*)-2-(((*R*)-*tert*-butylsulfinyl)imino)-1-((*E*)-4-methylpent-2-en-1-yl)cycloheptane-1-carboxylate **8**:

68% yield, yellow oil.  $[\alpha]_{20}^D = +16.26$  (c 1.0,  $\text{CHCl}_3$ ). IR (KBr)  $\nu_{\text{max}}$ : 2962, 2872, 1747, 1616, 1261, 1262, 974  $\text{cm}^{-1}$ .  $^1\text{H}$  NMR (400 MHz, Chloroform-*d*)  $\delta$  5.44 (dd,  $J = 15.3, 6.6$  Hz, 1H), 5.35 – 5.26 (m, 1H), 4.98 (m, 1H), 2.95 (ddd,  $J = 12.8, 6.5, 4.6$  Hz, 1H), 2.76 (dd,  $J = 13.9, 6.5$  Hz, 1H), 2.64 (ddd,  $J = 13.2, 8.4, 5.3$  Hz, 1H), 2.31 (dd,  $J = 13.9, 7.7$  Hz, 1H), 2.22 (dt,  $J = 13.5, 6.7$  Hz, 1H), 2.12 (dd,  $J = 13.2, 8.8$  Hz, 1H), 1.82 – 1.69 (m, 4H), 1.60 – 1.41 (m, 3H), 1.26 (s, 9H), 1.20 (dd,  $J = 6.3, 3.9$  Hz, 6H), 0.94 (dd,  $J = 6.7, 1.3$  Hz, 6H).  $^{13}\text{C}$  NMR (100 MHz, Chloroform-*d*)  $\delta$  187.3, 172.5, 142.0, 122.2, 68.6, 61.7, 57.1, 40.0, 34.3, 33.2, 31.3, 29.7, 27.1, 24.0, 22.7, 22.6, 22.6, 21.9, 21.9. HRMS (ESI) calculated for  $\text{C}_{21}\text{H}_{37}\text{NNaO}_3\text{S}^+$   $[\text{M}+\text{Na}]^+$ : 406.2386, found 406.2389.

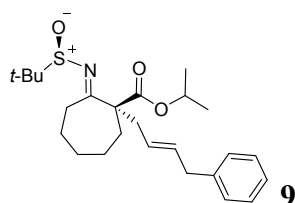

isopropyl (*R,E*)-2-(((*R*)-*tert*-butylsulfinyl)imino)-1-((*E*)-4-phenylbut-2-en-1-yl)cycloheptane-1-carboxylate **9**:

75% yield, yellow oil.  $[\alpha]_{20}^D = +12.43$  (c 0.4,  $\text{CHCl}_3$ ). IR (KBr)  $\nu_{\text{max}}$ : 2926, 2856, 2360, 2342, 1771, 1718, 1616, 1507, 1456, 1210, 1106, 803, 699, 669  $\text{cm}^{-1}$ .  $^1\text{H}$  NMR (400 MHz, Chloroform-*d*)  $\delta$  7.28 (d,  $J = 7.7$  Hz, 2H), 7.21 – 7.13 (m, 3H), 5.63 (dt,  $J = 14.2, 6.8$  Hz, 1H), 5.47 (dt,  $J = 15.0, 7.3$  Hz, 1H), 4.96 (m, 1H), 3.32 (d,  $J = 6.8$  Hz, 2H), 2.96 (dt,  $J = 12.1, 5.5$  Hz, 1H), 2.82 (dd,  $J = 14.0, 6.5$  Hz, 1H), 2.64 (dt,  $J = 13.2, 6.7$  Hz, 1H), 2.37 (dd,  $J = 14.0, 7.9$  Hz, 1H), 2.15 (dd,  $J = 13.3, 8.8$  Hz, 1H), 1.75 (td,  $J = 16.2, 13.1, 8.6$  Hz, 5H), 1.49 – 1.40 (m, 2H), 1.25 (s, 9H), 1.16 (dd,  $J = 8.0, 6.2$  Hz, 6H).  $^{13}\text{C}$  NMR (100 MHz, Chloroform-*d*)  $\delta$  187.1, 172.4, 140.6, 133.3, 128.6, 128.5, 126.9, 126.1, 68.7, 61.6, 57.2, 39.9, 39.3, 34.3, 33.3, 29.6, 27.1, 24.0, 22.5, 21.9, 21.8. HRMS (ESI) calculated for  $\text{C}_{25}\text{H}_{37}\text{NNaO}_3\text{S}^+$   $[\text{M}+\text{Na}]^+$ : 454.2386, found 454.2388.

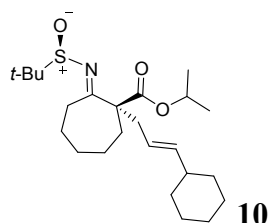

Isopropyl (*R,E*)-2-(((*R*)-*tert*-butylsulfinyl)imino)-1-((*E*)-3-cyclohexylallyl) cycloheptane-1-carboxylate **10**:

82% yield, yellow oil.  $[\alpha]_{20}^D = +18.56$  (c 1.9,  $\text{CHCl}_3$ ). IR (KBr)  $\nu_{\text{max}}$ : 2978, 2925, 2853, 1731, 1617, 1507, 1456, 1387, 1256, 1222, 1182, 1146, 1107, 1081, 972  $\text{cm}^{-1}$ .  $^1\text{H}$  NMR (400 MHz, Chloroform-*d*)  $\delta$  5.41 (dd,  $J = 15.4, 6.5$  Hz, 1H), 5.34 – 5.26 (m, 1H), 4.98 (m, 1H), 2.93 (ddd,  $J = 12.8, 6.6, 4.5$  Hz, 1H), 2.74 (dd,  $J = 13.9, 6.4$  Hz, 1H), 2.63 (ddd,  $J = 13.1, 8.5, 5.2$  Hz, 1H), 2.31 (dd,  $J = 13.9, 7.6$  Hz, 1H), 2.14 – 2.06 (m, 1H), 1.95 – 1.67 (m, 8H), 1.65 – 1.33 (m, 7H), 1.25 (s, 9H), 1.19 (dd,  $J = 6.3, 4.2$  Hz, 6H), 1.13 – 0.98 (m, 3H).  $^{13}\text{C}$  NMR (100 MHz, Chloroform-*d*)  $\delta$  187.2, 172.5, 140.9, 122.6, 68.6, 61.7, 57.1, 40.9, 40.1, 34.3, 33.2, 33.1, 33.1, 29.6, 27.1, 26.3, 26.1, 24.0, 22.5, 21.9, 21.9. HRMS (ESI) calculated for  $\text{C}_{24}\text{H}_{41}\text{NNaO}_3\text{S}^+$   $[\text{M}+\text{Na}]^+$ : 446.2699, found 446.2697.

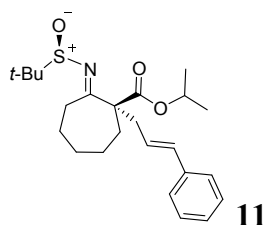

isopropyl (*R,E*)-2-(((*R*)-*tert*-butylsulfinyl)imino)-1-cinnamylcycloheptane-1-carboxylate **11**:

70% yield, yellow oil.  $[\alpha]_{22}^D = +29.52$  (c 0.4,  $\text{CHCl}_3$ ). IR (KBr)  $\nu_{\text{max}}$ : 2928, 2858, 2360, 2342, 2330, 1717, 1699, 1683, 1647, 1616, 1541, 1457, 1105, 1080, 669, 650  $\text{cm}^{-1}$ .  $^1\text{H}$  NMR (400 MHz, Chloroform-*d*)  $\delta$  7.29 (d,  $J = 7.5$  Hz, 4H), 7.20 (d,  $J = 6.8$  Hz, 1H), 6.41 (d,  $J = 15.7$  Hz, 1H), 6.19 (dt,  $J = 15.5, 7.8$  Hz, 1H), 5.01 (m, 1H), 3.00 (dd,  $J = 13.4, 6.5$  Hz, 2H), 2.69 (dt,  $J = 13.2, 6.6$  Hz, 1H), 2.55 (dd,  $J = 14.1, 8.3$  Hz, 1H), 2.19 (dd,  $J = 14.2, 9.0$  Hz, 1H), 1.80 (m, 5H), 1.56 – 1.42 (m, 2H), 1.28 (s, 9H), 1.20 (d,  $J = 6.2$  Hz, 6H).  $^{13}\text{C}$  NMR (100 MHz, Chloroform-*d*)  $\delta$  187.1, 172.4, 137.5, 133.6, 128.6, 127.4, 126.3, 126.0, 68.9, 61.8, 57.2, 40.6, 34.4, 33.7, 29.6, 27.1, 24.1, 22.6, 21.9, 21.9. HRMS (ESI) calculated for  $\text{C}_{24}\text{H}_{35}\text{NNaO}_3\text{S}^+$   $[\text{M}+\text{Na}]^+$ : 440.2230, found 440.2237.

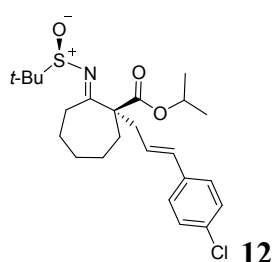

isopropyl (*R,E*)-2-(((*R*)-*tert*-butylsulfinyl) imino)-1-((*E*)-3-(4-chlorophenyl)allyl)cycloheptane-1-carboxylate **12**:

89% yield, yellow oil.  $[\alpha]_{22}^D = +30.50$  (c 0.7, CHCl<sub>3</sub>). IR (KBr)  $\nu_{\max}$ : 2977, 2928, 2858, 1729, 1684, 1616, 1506, 1490, 1456, 1235, 1185, 1104, 1080, 1012, 970, 823 cm<sup>-1</sup>. <sup>1</sup>H NMR (400 MHz, Chloroform-*d*)  $\delta$  7.26 – 7.17 (m, 4H), 6.36 (d,  $J = 15.8$  Hz, 1H), 6.17 (ddd,  $J = 15.4, 8.1, 6.6$  Hz, 1H), 5.01 (m, 1H), 3.17 – 2.86 (m, 2H), 2.67 (ddd,  $J = 13.2, 8.1, 5.5$  Hz, 1H), 2.54 (ddd,  $J = 14.0, 8.1, 1.1$  Hz, 1H), 2.18 (dd,  $J = 13.7, 8.8$  Hz, 1H), 1.89 – 1.67 (m, 4H), 1.62 – 1.43 (m, 3H), 1.27 (s, 9H), 1.19 (dd,  $J = 6.3, 3.7$  Hz, 6H). <sup>13</sup>C NMR (100 MHz, Chloroform-*d*)  $\delta$  187.0, 172.4, 135.9, 132.9, 132.3, 128.8, 127.4, 126.8, 68.9, 61.7, 57.2, 40.6, 34.4, 33.8, 29.6, 27.1, 24.0, 22.5, 21.9, 21.9. HRMS (ESI) calculated for C<sub>24</sub>H<sub>34</sub>ClNNaO<sub>3</sub>S<sup>+</sup> [M+Na]<sup>+</sup>: 474.1840, found 474.1847.

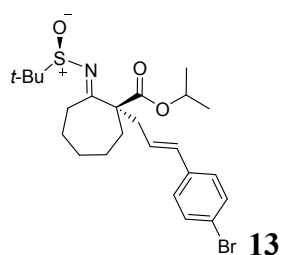

isopropyl (*R,E*)-1-((*E*)-3-(4-bromophenyl)allyl)-2-(((*R*)-*tert*-butylsulfinyl)imino)cycloheptane-1-carboxylate **13**:

82% yield,  $[\alpha]_{21}^D = +29.99$  (c 0.6, CHCl<sub>3</sub>). IR (KBr)  $\nu_{\max}$ : 2970, 2926, 2858, 1730, 1684, 1616, 1506, 1457, 1235, 1180, 1104, 1080, 1012, 970, 801 cm<sup>-1</sup>. <sup>1</sup>H NMR (400 MHz, Chloroform-*d*)  $\delta$  7.44 – 7.36 (m, 2H), 7.22 – 7.10 (m, 2H), 6.34 (d,  $J = 15.8$  Hz, 1H), 6.19 (ddd,  $J = 15.7, 8.0, 6.6$  Hz, 1H), 5.00 (m, 1H), 3.14 – 2.86 (m, 2H), 2.67 (ddd,  $J = 13.2, 8.0, 5.6$  Hz, 1H), 2.54 (ddd,  $J = 13.9, 8.1, 1.1$  Hz, 1H), 2.18 (dd,  $J = 13.7, 8.8$  Hz, 1H), 1.77 (ddt,  $J = 17.6, 13.4, 7.0$  Hz, 4H), 1.61 – 1.37 (m, 3H), 1.27 (s, 9H), 1.19 (dd,  $J = 6.3, 3.9$  Hz, 6H). <sup>13</sup>C NMR (100 MHz, Chloroform-*d*)  $\delta$  187.0, 172.4, 136.3, 132.4, 131.7, 127.8, 126.9, 121.1, 68.9, 61.6, 57.2, 40.6, 34.4, 33.8, 29.6, 27.1, 24.0,

22.5, 21.9, 21.8. HRMS (ESI) calculated for  $C_{24}H_{34}BrNNaO_3S^+$   $[M+Na]^+$ : 518.1335, found 518.1337.

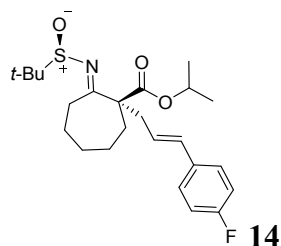

isopropyl (*R,E*)-2-(((*R*)-*tert*-butylsulfinyl)imino)-1-((*E*)-3-(4-fluorophenyl)allyl)cycloheptane-1-carboxylate **14**:

90% yield, yellow oil.  $[\alpha]_{23}^D = -10.40$  (c 0.3,  $CHCl_3$ ). IR (KBr)  $\nu_{max}$ : 2926, 2858, 2361, 2342, 1730, 1718, 1617, 1507, 1457, 1165, 1107, 1081, 1068, 1016, 969  $cm^{-1}$ .  $^1H$  NMR (400 MHz, Chloroform-*d*)  $\delta$  7.25 (d,  $J = 7.5$  Hz, 2H), 6.97 (t,  $J = 8.7$  Hz, 2H), 6.37 (d,  $J = 15.8$  Hz, 1H), 6.15 – 6.05 (m, 1H), 5.01 (m, 1H), 2.99 (ddd,  $J = 13.2, 10.6, 5.9$  Hz, 2H), 2.67 (ddd,  $J = 13.2, 8.3, 5.4$  Hz, 1H), 2.53 (dd,  $J = 14.1, 8.1$  Hz, 1H), 2.18 (dd,  $J = 13.9, 8.8$  Hz, 1H), 1.80 (dd,  $J = 14.8, 8.3$  Hz, 4H), 1.59 – 1.40 (m, 3H), 1.27 (s, 9H), 1.20 (dd,  $J = 6.3, 3.0$  Hz, 6H).  $^{13}C$  NMR (100 MHz, Chloroform-*d*)  $\delta$  187.1, 172.4, 163.4, 161.0, 133.6, 133.6, 132.3, 127.7, 127.6, 125.7, 115.6, 115.4, 68.9, 61.7, 57.2, 40.6, 34.4, 33.8, 29.6, 27.1, 24.0, 22.5, 21.9, 21.9.  $^{19}F$  NMR (376 MHz, Chloroform-*d*)  $\delta$  -115.10 (p,  $J = 7.3$  Hz). HRMS (ESI) calculated for  $C_{24}H_{34}FNNaO_3S^+$   $[M+Na]^+$ : 458.2136, found 458.2137.

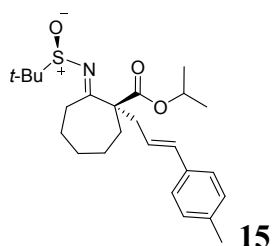

isopropyl (*R,E*)-2-(((*R*)-*tert*-butylsulfinyl)imino)-1-((*E*)-3-(*p*-tolyl)allyl)cycloheptane-1-carboxylate **15**

91% yield, yellow oil.  $[\alpha]_{21}^D = +12.77$  (c 1.2,  $CHCl_3$ ). IR (KBr)  $\nu_{max}$ : 2927, 2862, 2360, 2342, 1730, 1616, 1456, 1387, 1361, 1261, 1237, 1106, 1081, 970, 797  $cm^{-1}$ .  $^1H$  NMR (400 MHz, Chloroform-*d*)  $\delta$  7.23 – 7.15 (m, 2H), 7.08 (d,  $J = 8.0$  Hz, 2H), 6.38 (d,  $J = 15.7$  Hz, 1H), 6.12 (ddd,  $J = 15.4, 8.2, 6.6$  Hz, 1H), 5.00 (m, 1H), 3.11 – 2.84 (m, 2H), 2.68 (ddd,  $J = 13.2, 8.1, 5.4$  Hz, 1H), 2.53 (ddd,  $J = 13.9, 8.2, 1.2$  Hz, 1H), 2.31 (s, 3H), 2.21 – 2.12 (m, 1H), 1.77 (m, 5H), 1.57 – 1.42 (m, 2H), 1.28 (s, 9H), 1.20

(dd,  $J = 6.3, 1.4$  Hz, 6H).  $^{13}\text{C}$  NMR (100 MHz, Chloroform- $d$ )  $\delta$  187.1, 172.4, 137.1, 134.7, 133.4, 129.3, 126.1, 124.8, 68.8, 61.8, 57.2, 40.6, 34.4, 33.6, 29.6, 27.1, 24.0, 22.5, 21.9, 21.9, 21.3. HRMS (ESI) calculated for  $\text{C}_{25}\text{H}_{37}\text{NNaO}_3\text{S}^+$   $[\text{M}+\text{Na}]^+$ : 454.2386, found 454.2387.

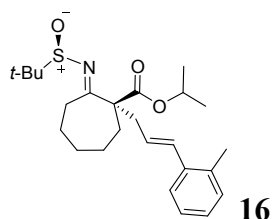

isopropyl (*R,E*)-2-(((*R*)-*tert*-butylsulfinyl)imino)-1-((*E*)-3-(*o*-tolyl)allyl)cycloheptane-1-carboxylate **16**:

89% yield, yellow oil.  $[\alpha]_{23}^{\text{D}} = +16.86$  (c 1.0,  $\text{CHCl}_3$ ). IR (KBr)  $\nu_{\text{max}}$ : 2926, 2868, 2360, 2342, 1731, 1617, 1456, 1386, 1361, 1261, 1237, 1106, 1081, 970, 801  $\text{cm}^{-1}$ .  $^1\text{H}$  NMR (400 MHz, Chloroform- $d$ )  $\delta$  7.38 – 7.32 (m, 1H), 7.12 (q,  $J = 3.1$  Hz, 3H), 6.66 – 6.56 (m, 1H), 6.05 (ddd,  $J = 15.3, 8.3, 6.5$  Hz, 1H), 5.01 (m, 1H), 3.12 – 2.93 (m, 2H), 2.75 – 2.64 (m, 1H), 2.58 (ddd,  $J = 14.0, 8.4, 1.2$  Hz, 1H), 2.31 (s, 3H), 2.23 – 2.15 (m, 1H), 1.82 (dtd,  $J = 17.6, 11.4, 10.7, 3.4$  Hz, 4H), 1.63 – 1.45 (m, 3H), 1.28 (s, 9H), 1.20 (dd,  $J = 6.3, 1.3$  Hz, 6H).  $^{13}\text{C}$  NMR (100 MHz, Chloroform- $d$ )  $\delta$  187.0, 172.4, 133.6, 135.1, 131.5, 130.3, 127.3, 126.2, 125.8, 68.8, 61.7, 57.2, 40.8, 34.4, 33.5, 29.6, 27.1, 24.0, 22.5, 21.9, 21.9, 20.0. HRMS (ESI) calculated for  $\text{C}_{25}\text{H}_{37}\text{NNaO}_3\text{S}^+$   $[\text{M}+\text{Na}]^+$ : 454.2386, found 454.2389.

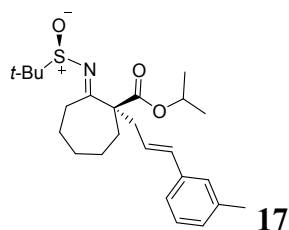

isopropyl (*R,E*)-2-(((*R*)-*tert*-butylsulfinyl)imino)-1-((*E*)-3-(*m*-tolyl)allyl)cycloheptane-1-carboxylate **17**:

82% yield, yellow oil.  $[\alpha]_{24}^{\text{D}} = +15.93$  (c 0.7,  $\text{CHCl}_3$ ). IR (KBr)  $\nu_{\text{max}}$ : 2927, 2862, 2360, 2342, 1731, 1616, 1456, 1387, 1361, 1261, 1237, 1107, 1082, 970, 797  $\text{cm}^{-1}$ .  $^1\text{H}$  NMR (400 MHz, Chloroform- $d$ )  $\delta$  7.20 – 7.09 (m, 3H), 7.02 (d,  $J = 7.4$  Hz, 1H), 6.38 (d,  $J = 15.7$  Hz, 1H), 6.17 (dt,  $J = 15.3, 7.4$  Hz, 1H), 5.01 (m, 1H), 2.99 (dd,  $J = 13.8, 6.5$  Hz, 2H), 2.69 (dq,  $J = 13.3, 7.0, 6.0$  Hz, 1H), 2.54 (dd,  $J = 14.0, 8.2$  Hz, 1H), 2.32

(s, 3H), 2.18 (dd,  $J = 14.3, 8.8$  Hz, 1H), 1.82 (dd,  $J = 12.2, 7.8$  Hz, 4H), 1.61 – 1.43 (m, 3H), 1.28 (s, 9H), 1.21 (d,  $J = 6.2$  Hz, 6H).  $^{13}\text{C}$  NMR (100 MHz, Chloroform- $d$ )  $\delta$  187.1, 172.4, 138.2, 137.4, 133.7, 128.5, 128.1, 127.0, 125.7, 123.4, 68.8, 61.8, 57.2, 40.6, 34.4, 33.6, 29.6, 27.1, 24.1, 22.6, 21.9, 21.9, 21.5. HRMS (ESI) calculated for  $\text{C}_{25}\text{H}_{37}\text{NNaO}_3\text{S}^+$   $[\text{M}+\text{Na}]^+$ : 454.2386, found 454.2388.

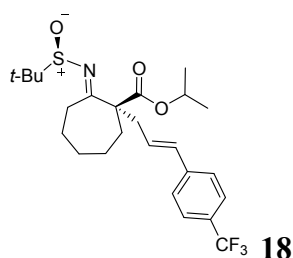

isopropyl (*R,E*)-2-(((*R*)-*tert*-butylsulfinyl)imino)-1-((*E*)-3-(4-(trifluoromethyl)phenyl)allyl)cycloheptane-1-carboxylate **18**:

87% yield, yellow oil.  $[\alpha]_{24}^{\text{D}} = +31.26$  (c 0.4,  $\text{CHCl}_3$ ). IR (KBr)  $\nu_{\text{max}}$ : 2928, 2857, 2360, 2342, 1732, 1718, 1618, 1507, 1457, 1165, 1123, 1107, 1080, 1068, 1016  $\text{cm}^{-1}$ .  $^1\text{H}$  NMR (400 MHz, Chloroform- $d$ )  $\delta$  7.53 (d,  $J = 8.0$  Hz, 2H), 7.39 (d,  $J = 8.0$  Hz, 2H), 6.44 (d,  $J = 15.8$  Hz, 1H), 6.32 (dt,  $J = 15.3, 7.2$  Hz, 1H), 5.07 – 4.96 (m, 1H), 3.01 (dd,  $J = 13.2, 6.5$  Hz, 2H), 2.68 (dt,  $J = 13.3, 6.7$  Hz, 1H), 2.58 (dd,  $J = 14.1, 8.0$  Hz, 1H), 2.19 (dd,  $J = 13.7, 8.8$  Hz, 1H), 1.87 – 1.71 (m, 4H), 1.59 (d,  $J = 4.9$  Hz, 2H), 1.53 – 1.46 (m, 1H), 1.28 (s, 9H), 1.20 (ddd,  $J = 6.0, 4.2, 1.4$  Hz, 6H).  $^{13}\text{C}$  NMR (100 MHz, Chloroform- $d$ )  $\delta$  186.9, 172.3, 140.9, 132.2, 129.1, 126.4, 125.6, 125.6, 69.0, 61.7, 57.2, 40.6, 34.4, 33.9, 29.6, 27.1, 24.1, 22.5, 22.0, 21.9.  $^{19}\text{F}$  NMR (376 MHz, Chloroform- $d$ )  $\delta$  -62.5. HRMS (ESI) calculated for  $\text{C}_{25}\text{H}_{34}\text{F}_3\text{NNaO}_3\text{S}^+$   $[\text{M}+\text{Na}]^+$ : 508.2104, found 508.2108.

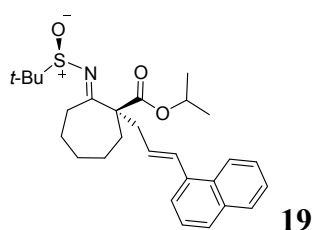

isopropyl (*R,E*)-2-(((*R*)-*tert*-butylsulfinyl)imino)-1-((*E*)-3-(naphthalen-1-yl)allyl)cycloheptane-1-carboxylate **19**:

93% yield, yellow oil.  $[\alpha]_{24}^{\text{D}} = 28.42$  (c 0.5,  $\text{CHCl}_3$ ). IR (KBr)  $\nu_{\text{max}}$ : 2927, 2857, 2360, 2342, 1732, 1717, 1616, 1507, 1457, 1105, 1079, 815  $\text{cm}^{-1}$ .  $^1\text{H}$  NMR (400 MHz,

Chloroform-*d*)  $\delta$  7.81 – 7.73 (m, 3H), 7.65 (d,  $J = 1.6$  Hz, 1H), 7.53 (dd,  $J = 8.6, 1.7$  Hz, 1H), 7.47 – 7.39 (m, 2H), 6.58 (d,  $J = 15.8$  Hz, 1H), 6.33 (ddd,  $J = 15.4, 8.2, 6.6$  Hz, 1H), 5.03 (m, 1H), 3.10 – 2.93 (m, 2H), 2.73 – 2.56 (m, 2H), 2.26 – 2.16 (m, 1H), 1.89 – 1.73 (m, 4H), 1.61 – 1.44 (m, 3H), 1.30 (s, 9H), 1.21 (dd,  $J = 6.3, 2.1$  Hz, 6H).  $^{13}\text{C}$  NMR (100 MHz, Chloroform-*d*)  $\delta$  187.1, 172.5, 134.9, 133.7, 133.6, 132.9, 128.3, 128.0, 127.8, 126.4, 126.3, 125.9, 125.8, 123.6, 68.9, 61.8, 57.2, 40.8, 34.4, 33.8, 29.6, 27.1, 24.0, 22.6, 22.0, 21.9. HRMS (ESI) calculated for  $\text{C}_{28}\text{H}_{37}\text{NNaO}_3\text{S}^+$   $[\text{M}+\text{Na}]^+$ : 490.2386, found 490.2388.

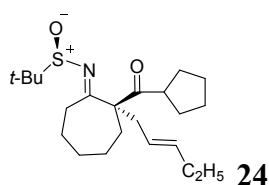

(*R*)-*N*-((*R,E*)-2-(cyclopentanecarbonyl)-2-((*E*)-pent-2-en-1-yl)cycloheptylidene)-2-methylpropane-2-sulfinamide **24**:

93% yield, yellow oil.  $[\alpha]_{20}^{\text{D}} = +376.093$  (c 0.9,  $\text{CHCl}_3$ ). IR (KBr)  $\nu_{\text{max}}$ : 2959, 2929, 2867, 1705, 1609, 1456, 1360, 1261, 1181, 1083, 802  $\text{cm}^{-1}$ .  $^1\text{H}$  NMR (400 MHz, Chloroform-*d*)  $\delta$  5.49 (dt,  $J = 15.2, 6.3, 1.3$  Hz, 1H), 5.13 (dddt,  $J = 14.9, 8.2, 6.7, 1.6$  Hz, 1H), 3.24 – 3.06 (m, 2H), 3.02 – 2.88 (m, 1H), 2.28 (ddd,  $J = 14.6, 7.9, 1.2$  Hz, 1H), 2.18 – 2.04 (m, 2H), 2.01 – 1.85 (m, 4H), 1.79 – 1.65 (m, 7H), 1.64 – 1.35 (m, 5H), 1.31 (s, 9H), 1.21 – 1.12 (m, 1H), 0.92 (t,  $J = 7.5$  Hz, 3H).  $^{13}\text{C}$  NMR (100 MHz, Chloroform-*d*)  $\delta$  213.8, 187.3, 136.8, 123.7, 68.9, 57.5, 46.3, 37.9, 35.7, 33.0, 31.5, 30.1, 29.6, 29.3, 26.8, 26.6, 25.8, 23.3, 22.9, 13.8. HRMS (ESI) calculated for  $\text{C}_{22}\text{H}_{37}\text{NNaO}_2\text{S}^+$   $[\text{M}+\text{Na}]^+$ : 402.2437, found 402.2437.

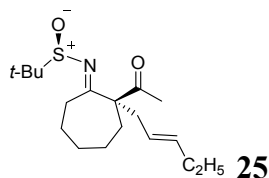

(*R*)-*N*-((*R,E*)-2-acetyl-2-((*E*)-pent-2-en-1-yl)cycloheptylidene)-2-methylpropane-2-sulfinamide **25**:

92% yield, yellow oil.  $[\alpha]_{24}^{\text{D}} = +222.40$  (c 1.3,  $\text{CHCl}_3$ ). IR (KBr)  $\nu_{\text{max}}$ : 2958, 2927, 2867, 1705, 1609, 1456, 1360, 1261, 1181, 1083, 801  $\text{cm}^{-1}$ .  $^1\text{H}$  NMR (400 MHz, Chloroform-*d*)  $\delta$  5.52 (dt,  $J = 14.1, 6.5$  Hz, 1H), 5.20 (dt,  $J = 15.0, 7.3$  Hz, 1H), 3.00 (ddd,  $J = 12.0, 6.8, 2.8$  Hz, 1H), 2.86 (dd,  $J = 14.6, 6.8$  Hz, 1H), 2.36 (ddd,  $J = 22.1,$



12.8, 8.0 Hz, 2H), 2.16 – 2.09 (m, 4H), 2.01 – 1.72 (m, 6H), 1.66 – 1.41 (m, 3H), 1.28 (s, 9H), 0.96 – 0.90 (m, 3H). <sup>13</sup>C NMR (100 MHz, Chloroform-*d*) δ 207.3, 188.0, 136.9, 123.6, 68.4, 57.4, 38.6, 34.7, 30.5, 29.9, 28.6, 26.7, 25.8, 23.7, 22.8, 13.8. HRMS (ESI) calculated for C<sub>18</sub>H<sub>31</sub>NNaO<sub>2</sub>S<sup>+</sup> [M+Na]<sup>+</sup>: 348.1968, found 348.1967.

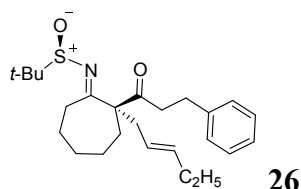

(*R*)-2-methyl-N-((*R,E*)-2-((*E*)-pent-2-en-1-yl)-2-(3-phenylpropanoyl)cycloheptylidene)propane-2-sulfinamide **26**:

89% yield, yellow oil. [ $\alpha$ ]<sub>23</sub> D= +158.64 (c 0.4, CHCl<sub>3</sub>). IR (KBr)  $\nu_{\max}$ : 2928, 2858, 2360, 1731, 1618, 1456, 1387, 1261, 1237, 1107, 1082, 970, 801 cm<sup>-1</sup>. <sup>1</sup>H NMR (400 MHz, Chloroform-*d*) δ 7.29 – 7.27 (m, 1H), 7.25 – 7.05 (m, 4H), 5.48 (dt, *J* = 14.4, 6.6 Hz, 1H), 5.10 (dt, *J* = 15.2, 7.4 Hz, 1H), 2.92 – 2.64 (m, 6H), 2.27 (dd, *J* = 14.8, 7.9 Hz, 1H), 2.10 (q, *J* = 10.8 Hz, 2H), 1.95 (t, *J* = 7.4 Hz, 2H), 1.73 (dt, *J* = 58.6, 10.2 Hz, 5H), 1.36 – 1.23 (m, 11H), 0.92 (t, *J* = 7.3 Hz, 3H). <sup>13</sup>C NMR (100 MHz, Chloroform-*d*) δ 208.4, 187.4, 141.1, 136.9, 128.6, 128.6, 126.3, 123.7, 68.4, 57.5, 40.2, 38.3, 34.7, 30.1, 30.0, 29.9, 29.1, 25.8, 23.5, 22.8, 13.9. HRMS (ESI) calculated for C<sub>25</sub>H<sub>37</sub>NNaO<sub>2</sub>S<sup>+</sup> [M+Na]<sup>+</sup>: 438.2437, found 438.2433.

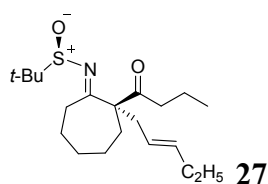

(*R*)-N-((*R,E*)-2-butyl-2-((*E*)-pent-2-en-1-yl)cycloheptylidene)-2-methylpropane-2-sulfinamide **27**:

97% yield, yellow oil. [ $\alpha$ ]<sub>21</sub> D= 222.65 (c 1.1, CHCl<sub>3</sub>). IR (KBr)  $\nu_{\max}$ : 2926, 2857, 1731, 1616, 1457, 1386, 1368, 1205, 1182, 1146, 1107, 1082, 801 cm<sup>-1</sup>. <sup>1</sup>H NMR (400 MHz, Chloroform-*d*) δ 5.50 (dt, *J* = 14.8, 6.4 Hz, 1H), 5.17 (dt, *J* = 15.0, 7.3 Hz, 1H), 3.05 (ddd, *J* = 11.9, 6.7, 2.7 Hz, 1H), 2.89 (dd, *J* = 14.6, 6.7 Hz, 1H), 2.38 (t, *J* = 7.2 Hz, 2H), 2.33 – 2.20 (m, 2H), 2.11 (dd, *J* = 15.1, 10.2 Hz, 1H), 2.01 – 1.53 (m, 9H), 1.30 (m, 11H), 0.92 (t, *J* = 7.4 Hz, 3H), 0.84 (t, *J* = 7.4 Hz, 3H). <sup>13</sup>C NMR (100 MHz, Chloroform-*d*) δ 209.3, 187.8, 136.8, 123.8, 68.3, 57.4, 40.3, 38.4, 35.0, 30.1, 30.0,

29.1, 25.8, 23.5, 22.8, 17.4, 13.9, 13.9. HRMS (ESI) calculated for  $C_{20}H_{35}NNaO_2S^+$   $[M+Na]^+$ : 376.2281, found 376.2283.

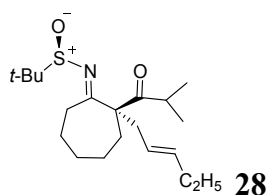

*(R)*-*N*-((*R,E*)-2-isobutyryl-2-((*E*)-pent-2-en-1-yl)cycloheptylidene)-2-methylpropane-2-sulfinamide **28**:

95% yield, yellow oil.  $[\alpha]_{21}^D = +255.45$  (c 0.6,  $CHCl_3$ ). IR (KBr)  $\nu_{max}$ : 2927, 2860, 1731, 1616, 1458, 1386, 1374, 1361, 1261, 1206, 1155, 1106, 1083, 969, 802  $cm^{-1}$ .  $^1H$  NMR (400 MHz, Chloroform-*d*)  $\delta$  5.55 – 5.45 (m, 1H), 5.13 (m, 1H), 3.24 – 3.01 (m, 2H), 2.98 – 2.87 (m, 1H), 2.32 (ddd,  $J = 14.7, 8.0, 1.2$  Hz, 1H), 2.18 – 1.90 (m, 6H), 1.80 – 1.63 (m, 3H), 1.32 (m, 11H), 1.03 (d,  $J = 6.6$  Hz, 3H), 0.93 (t,  $J = 7.5$  Hz, 3H), 0.89 (d,  $J = 6.7$  Hz, 3H).  $^{13}C$  NMR (100 MHz, Chloroform-*d*)  $\delta$  213.9, 187.2, 136.8, 123.8, 69.0, 57.5, 37.8, 35.8, 34.9, 30.1, 29.9, 28.8, 25.8, 23.2, 22.9, 20.8, 19.8, 13.8. HRMS (ESI) calculated for  $C_{20}H_{35}NNaO_2S^+$   $[M+Na]^+$ : 376.2281, found 376.2284.

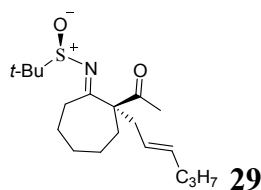

*(R)*-*N*-((*R,E*)-2-acetyl-2-((*E*)-hex-2-en-1-yl)cycloheptylidene)-2-methylpropane-2-sulfinamide **29**:

83% yield, yellow oil.  $[\alpha]_{24}^D = +210.65$  (c 1.3,  $CHCl_3$ ). IR (KBr)  $\nu_{max}$ : 2956, 2927, 2860, 1710, 1610, 1457, 1359, 1166, 1148, 1082, 970  $cm^{-1}$ .  $^1H$  NMR (400 MHz, Chloroform-*d*)  $\delta$  5.48 (dt,  $J = 15.0, 6.8, 1.3$  Hz, 1H), 5.24 – 5.16 (m, 1H), 3.01 (ddd,  $J = 12.0, 7.0, 3.1$  Hz, 1H), 2.88 (ddt,  $J = 14.5, 6.7, 1.2$  Hz, 1H), 2.42 – 2.30 (m, 2H), 2.10 (s, 4H), 1.99 – 1.74 (m, 5H), 1.69 – 1.63 (m, 2H), 1.56 – 1.33 (m, 4H), 1.28 (s, 9H), 0.85 (t,  $J = 7.4$  Hz, 3H).  $^{13}C$  NMR (100 MHz, Chloroform-*d*)  $\delta$  207.3, 188.0, 135.2, 124.7, 68.3, 57.4, 38.6, 34.8, 34.7, 30.4, 29.9, 28.6, 26.7, 23.7, 22.7, 22.6, 13.7. HRMS (ESI) calculated for  $C_{19}H_{33}NNaO_2S^+$   $[M+Na]^+$ : 362.2124, found 362.2127.

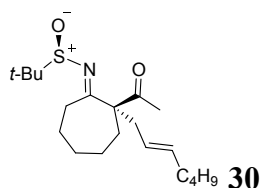

(*R*)-*N*-((*R,E*)-2-acetyl-2-((*E*)-hept-2-en-1-yl)cycloheptylidene)-2-methylpropane-2-sulfonamide **30**:

80% yield, yellow oil.  $[\alpha]_{24}^D = +219.67$  (c 1.8,  $\text{CHCl}_3$ ). IR (KBr)  $\nu_{\text{max}}$ : 2958, 2928, 2858, 1711, 1616, 1458, 1359, 1205, 1148, 1082, 979  $\text{cm}^{-1}$ .  $^1\text{H}$  NMR (400 MHz, Chloroform-*d*)  $\delta$  5.53 – 5.43 (m, 1H), 5.23 – 5.15 (m, 1H), 3.00 (ddd,  $J = 12.0, 7.0, 3.1$  Hz, 1H), 2.86 (dd,  $J = 14.6, 6.7$  Hz, 1H), 2.41 – 2.29 (m, 2H), 2.09 (s, 4H), 2.03 – 1.67 (m, 7H), 1.66 – 1.29 (m, 6H), 1.27 (s, 9H), 0.85 (t,  $J = 7.0$  Hz, 3H).  $^{13}\text{C}$  NMR (100 MHz, Chloroform-*d*)  $\delta$  207.3, 188.0, 135.4, 124.5, 68.3, 57.3, 38.6, 34.7, 32.4, 31.6, 30.4, 29.9, 28.5, 26.7, 23.7, 22.7, 22.3, 14.0. HRMS (ESI) calculated for  $\text{C}_{20}\text{H}_{35}\text{NNaO}_2\text{S}^+$   $[\text{M}+\text{Na}]^+$ : 376.2281, found 376.2287.

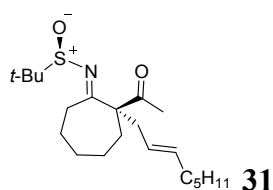

(*R*)-*N*-((*R,E*)-2-acetyl-2-((*E*)-oct-2-en-1-yl)cycloheptylidene)-2-methylpropane-2-sulfonamide **31**:

81% yield, yellow oil.  $[\alpha]_{22}^D = +251.97$  (c 0.8,  $\text{CHCl}_3$ ). IR (KBr)  $\nu_{\text{max}}$ : 2959, 2927, 2860, 1716, 1617, 1458, 1359, 1205, 1150, 1082, 979  $\text{cm}^{-1}$ .  $^1\text{H}$  NMR (400 MHz, Chloroform-*d*)  $\delta$  5.49 (dt,  $J = 14.9, 6.7, 1.3$  Hz, 1H), 5.26 – 5.12 (m, 1H), 3.01 (ddd,  $J = 12.0, 6.9, 3.1$  Hz, 1H), 2.88 (dd,  $J = 14.5, 6.7$  Hz, 1H), 2.43 – 2.30 (m, 2H), 2.10 (s, 4H), 2.02 – 1.64 (m, 8H), 1.55 – 1.33 (m, 3H), 1.29 (s, 9H), 1.26 – 1.19 (m, 4H), 0.87 (t,  $J = 6.9$  Hz, 3H).  $^{13}\text{C}$  NMR (100 MHz, Chloroform-*d*)  $\delta$  207.4, 188.0, 135.5, 124.5, 68.4, 57.4, 38.6, 34.7, 32.7, 31.5, 30.4, 29.9, 29.2, 28.6, 26.7, 23.7, 22.8, 22.6, 14.2. HRMS (ESI) calculated for  $\text{C}_{21}\text{H}_{37}\text{NNaO}_2\text{S}^+$   $[\text{M}+\text{Na}]^+$ : 390.2437, found 390.2433.

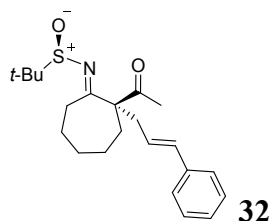

(*R*)-*N*-((*R,E*)-2-acetyl-2-cinnamylcycloheptylidene)-2-methylpropane-2-sulfinamide

**32**:

90% yield, yellow oil.  $[\alpha]_{24}^D = +165.74$  (c 1.1,  $\text{CHCl}_3$ ). IR (KBr)  $\nu_{\text{max}}$ : 2927, 2857, 1707, 1610, 1496, 1456, 1360, 1079, 967, 746, 694  $\text{cm}^{-1}$ .  $^1\text{H}$  NMR (400 MHz, Chloroform-*d*)  $\delta$  7.31 – 7.26 (m, 4H), 7.21 (td,  $J = 5.8, 2.6$  Hz, 1H), 6.44 (d,  $J = 15.7$  Hz, 1H), 6.02 (dt,  $J = 15.3, 7.4$  Hz, 1H), 3.11 – 3.01 (m, 2H), 2.63 – 2.55 (m, 1H), 2.45 (td,  $J = 11.4, 3.2$  Hz, 1H), 2.17 (s, 4H), 1.92 – 1.67 (m, 5H), 1.56 – 1.37 (m, 2H), 1.31 (s, 9H).  $^{13}\text{C}$  NMR (100 MHz, Chloroform-*d*)  $\delta$  207.2, 187.8, 137.1, 134.0, 128.7, 127.6, 126.3, 125.1, 68.3, 57.4, 39.3, 34.8, 31.0, 30.0, 28.5, 26.8, 23.9, 22.8. HRMS (ESI) calculated for  $\text{C}_{22}\text{H}_{31}\text{NNaO}_2\text{S}^+$   $[\text{M}+\text{Na}]^+$ : 396.1968, found 396.1963.

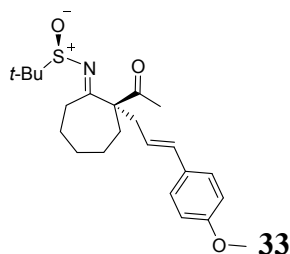

(*R*)-*N*-((*R,E*)-2-acetyl-2-((*E*)-3-(4-methoxyphenyl)allyl)cycloheptylidene)-2-methylpropane-2-sulfinamide **33**:

91% yield, yellow oil.  $[\alpha]_{24}^D = +141.90$  (c 0.8,  $\text{CHCl}_3$ ). IR (KBr)  $\nu_{\text{max}}$ : 2927, 2856, 2342, 1706, 1635, 1608, 1457, 1109, 1034, 968, 834, 802, 754  $\text{cm}^{-1}$ .  $^1\text{H}$  NMR (400 MHz, Chloroform-*d*)  $\delta$  7.23 (d,  $J = 8.6$  Hz, 2H), 6.82 (d,  $J = 8.4$  Hz, 2H), 6.37 (d,  $J = 15.7$  Hz, 1H), 5.86 (dt,  $J = 15.3, 7.4$  Hz, 1H), 3.79 (s, 3H), 3.11 – 2.99 (m, 2H), 2.56 (dd,  $J = 14.6, 7.9$  Hz, 1H), 2.44 (td,  $J = 11.5, 3.2$  Hz, 1H), 2.16 (s, 4H), 1.92 – 1.68 (m, 5H), 1.59 – 1.39 (m, 2H), 1.31 (s, 9H).  $^{13}\text{C}$  NMR (100 MHz, Chloroform-*d*)  $\delta$  207.3, 187.9, 159.3, 133.3, 130.0, 127.4, 122.8, 114.1, 68.4, 57.4, 55.4, 39.3, 34.8, 31.0, 30.0, 28.5, 26.8, 23.9, 22.8. HRMS (ESI) calculated for  $\text{C}_{23}\text{H}_{33}\text{NNaO}_3\text{S}^+$   $[\text{M}+\text{Na}]^+$ : 426.2073, found 426.2074.

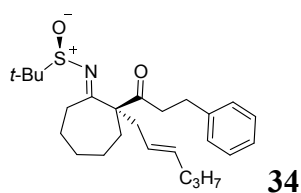

(*R*)-*N*-((*R,E*)-2-((*E*)-hex-2-en-1-yl)-2-(3-phenylpropanoyl)cycloheptylidene)-2-methylpropane-2-sulfinamide **34**:

89% yield, yellow oil.  $[\alpha]_{22}^D = +176.25$  (c 0.8,  $\text{CHCl}_3$ ). IR (KBr)  $\nu_{\text{max}}$ : 2928, 2857, 1709, 1616, 1496, 1456, 1367, 1078, 967, 746, 694  $\text{cm}^{-1}$ .  $^1\text{H}$  NMR (400 MHz, Chloroform-*d*)  $\delta$  7.27 – 7.11 (m, 5H), 5.43 (dt,  $J = 15.0, 7.3$  Hz, 1H), 5.09 (dt,  $J = 15.3, 7.4$  Hz, 1H), 2.93 – 2.60 (m, 6H), 2.26 (dd,  $J = 15.1, 8.0$  Hz, 1H), 2.09 (q,  $J = 10.8$  Hz, 2H), 1.85 (dt,  $J = 40.9, 11.4$  Hz, 4H), 1.66 (d,  $J = 9.9$  Hz, 2H), 1.43 – 1.18 (m, 14H), 0.85 (t,  $J = 6.8$  Hz, 3H).  $^{13}\text{C}$  NMR (100 MHz, Chloroform-*d*)  $\delta$  208.3, 187.4, 141.1, 135.2, 128.6, 128.6, 126.3, 124.8, 68.3, 57.5, 40.2, 38.3, 34.8, 34.7, 30.1, 29.9, 29.0, 23.5, 22.8, 22.6, 13.8. HRMS (ESI) calculated for  $\text{C}_{26}\text{H}_{39}\text{NNaO}_2\text{S}^+$   $[\text{M}+\text{Na}]^+$ : 452.2594, found 452.2595.

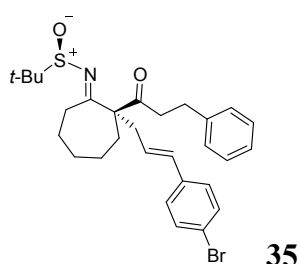

(*R*)-*N*-((*R,E*)-2-((*E*)-3-(4-bromophenyl)allyl)-2-(3-phenylpropanoyl)cycloheptylidene)-2-methylpropane-2-sulfinamide **35**:

89% yield, yellow oil.  $[\alpha]_{22}^D = +121.58$  (c 1.2,  $\text{CHCl}_3$ ). IR (KBr)  $\nu_{\text{max}}$ : 2958, 2925, 2858, 2360, 2341, 1706, 1609, 1506, 1455, 1261, 1705, 1009, 800, 750, 699  $\text{cm}^{-1}$ .  $^1\text{H}$  NMR (400 MHz, Chloroform-*d*)  $\delta$  7.39 (dd,  $J = 8.4, 2.0$  Hz, 2H), 7.26 – 7.22 (m, 2H), 7.21 – 7.06 (m, 5H), 6.30 (d,  $J = 15.5$  Hz, 1H), 5.85 (dt,  $J = 15.8, 7.6$  Hz, 1H), 3.02 (dd,  $J = 14.9, 6.7$  Hz, 1H), 2.84 (m, 5H), 2.48 (dd,  $J = 14.8, 8.1$  Hz, 1H), 2.23 – 2.03 (m, 2H), 1.83 (dd,  $J = 15.3, 8.6$  Hz, 2H), 1.77 – 1.64 (m, 3H), 1.47 – 1.39 (m, 1H), 1.30 (s, 9H), 1.27 – 1.24 (m, 1H).  $^{13}\text{C}$  NMR (100 MHz, Chloroform-*d*)  $\delta$  208.1, 187.2, 140.9, 135.9, 132.7, 131.7, 128.7, 128.6, 127.8, 126.4, 126.1, 121.3, 68.2, 57.5, 40.3, 39.0, 34.7, 30.6, 30.0, 30.0, 28.9, 23.6, 22.8. HRMS (ESI) calculated for  $\text{C}_{29}\text{H}_{36}\text{BrNNaO}_2\text{S}^+$   $[\text{M}+\text{Na}]^+$ : 564.1542, found 564.1545.

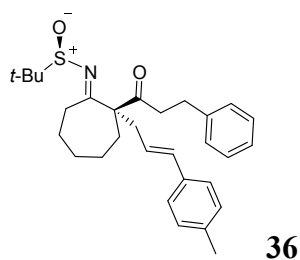

(*R*)-2-methyl-N-((*R,E*)-2-(3-phenylpropanoyl)-2-((*E*)-3-(*p*-tolyl)allyl) cycloheptylidene) propane-2-sulfinamide **36**:

85% yield, yellow oil.  $[\alpha]_{22}^D = +136.80$  (c 1.6,  $\text{CHCl}_3$ ). IR (KBr)  $\nu_{\text{max}}$ : 2960, 2925, 2858, 2360, 2342, 1709, 1611, 1509, 1262, 1009, 801, 750, 699  $\text{cm}^{-1}$ .  $^1\text{H}$  NMR (400 MHz, Chloroform-*d*)  $\delta$  7.28 (d,  $J = 7.1$  Hz, 1H), 7.25 (d,  $J = 1.7$  Hz, 1H), 7.21 – 7.08 (m, 7H), 6.36 (d,  $J = 15.6$  Hz, 1H), 5.84 (ddd,  $J = 15.3, 8.1, 6.7$  Hz, 1H), 3.05 (dd,  $J = 14.7, 6.7$  Hz, 1H), 2.92 – 2.74 (m, 5H), 2.50 (ddd,  $J = 14.7, 8.1, 1.3$  Hz, 1H), 2.33 (s, 3H), 2.19 – 2.08 (m, 2H), 1.87 (dd,  $J = 15.1, 8.6$  Hz, 2H), 1.74 – 1.65 (m, 3H), 1.47 – 1.38 (m, 1H), 1.31 (s, 9H), 1.28 – 1.25 (m, 1H).  $^{13}\text{C}$  NMR (100 MHz, Chloroform-*d*)  $\delta$  208.2, 187.3, 141.0, 137.4, 134.3, 133.8, 129.3, 128.6, 128.6, 126.3, 126.2, 124.0, 68.4, 57.5, 40.3, 39.0, 34.7, 30.4, 30.1, 30.0, 29.0, 23.6, 22.8, 21.3. HRMS (ESI) calculated for  $\text{C}_{30}\text{H}_{39}\text{NNaO}_2\text{S}^+$   $[\text{M}+\text{Na}]^+$ : 500.2594, found 500.2595.

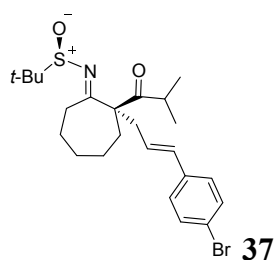

(*R*)-N-((*R,E*)-2-((*E*)-3-(4-bromophenyl)allyl)-2-isobutyrylcycloheptylidene)-2-methylpropane-2-sulfinamide **37**:

91% yield, yellow oil.  $[\alpha]_{21}^D = +180.30$  (c 2.3,  $\text{CHCl}_3$ ). IR (KBr)  $\nu_{\text{max}}$ : 2970, 2926, 2858, 1733, 1617, 1506, 1457, 1235, 1180, 1104, 1080, 1016, 977, 801  $\text{cm}^{-1}$ .  $^1\text{H}$  NMR (400 MHz, Chloroform-*d*)  $\delta$  7.39 (d,  $J = 8.4$  Hz, 2H), 7.13 (d,  $J = 8.4$  Hz, 2H), 6.35 (d,  $J = 15.7$  Hz, 1H), 5.93 (ddd,  $J = 15.3, 8.0, 6.7$  Hz, 1H), 3.37 – 2.95 (m, 3H), 2.56 (ddd,  $J = 14.8, 8.1, 1.3$  Hz, 1H), 2.16 (ddd,  $J = 25.8, 13.6, 9.7$  Hz, 2H), 1.96 (m, 2H), 1.80 – 1.64 (m, 3H), 1.33 (m, 11H), 1.05 (d,  $J = 6.6$  Hz, 3H), 0.93 (d,  $J = 6.7$  Hz, 3H).  $^{13}\text{C}$  NMR (100 MHz, Chloroform-*d*)  $\delta$  213.7, 187.0, 136.0, 132.7, 131.8, 127.7, 126.3, 121.2, 68.9, 57.5, 38.4, 35.8, 35.2, 30.1, 29.7, 29.5, 23.3, 22.8, 20.7, 20.0. HRMS (ESI) calculated for  $\text{C}_{24}\text{H}_{34}\text{BrNNaO}_2\text{S}^+$   $[\text{M}+\text{Na}]^+$ : 502.1386, found 502.1384.

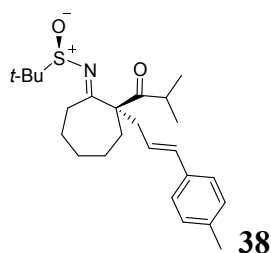

*(R)*-N-((*R,E*)-2-isobutyryl-2-((*E*)-3-(*p*-tolyl)allyl)cycloheptylidene)-2-methylpropane-2-sulfinamide **38**:

83% yield, yellow oil.  $[\alpha]_{21}^D = +284.78$  (c 1.4,  $\text{CHCl}_3$ ). IR (KBr)  $\nu_{\text{max}}$ : 2971, 2927, 2860, 1733, 1614, 1505, 1456, 1180, 1101, 1089, 1016, 977, 801  $\text{cm}^{-1}$ .  $^1\text{H}$  NMR (400 MHz, Chloroform-*d*)  $\delta$  7.18 (d,  $J = 8.0$  Hz, 2H), 7.09 (d,  $J = 7.9$  Hz, 2H), 6.38 (d,  $J = 15.7$  Hz, 1H), 5.88 (ddd,  $J = 15.3, 8.0, 6.7$  Hz, 1H), 3.24 – 3.04 (m, 3H), 2.57 (ddd,  $J = 14.8, 8.0, 1.3$  Hz, 1H), 2.31 (s, 3H), 2.16 (ddd,  $J = 24.9, 13.6, 9.7$  Hz, 2H), 1.98 (dd,  $J = 15.4, 8.3$  Hz, 2H), 1.82 – 1.67 (m, 3H), 1.40 (dd,  $J = 11.4, 6.1$  Hz, 1H), 1.35 (s, 9H), 1.24 – 1.17 (m, 1H), 1.06 (d,  $J = 6.6$  Hz, 3H), 0.93 (d,  $J = 6.7$  Hz, 3H).  $^{13}\text{C}$  NMR (100 MHz, Chloroform-*d*)  $\delta$  213.8, 187.1, 137.3, 134.3, 133.7, 129.4, 126.1, 124.2, 69.1, 57.6, 38.4, 35.8, 35.2, 30.2, 29.8, 29.4, 23.3, 22.9, 21.3, 20.8, 19.9. HRMS (ESI) calculated for  $\text{C}_{25}\text{H}_{37}\text{NNaO}_2\text{S}^+$   $[\text{M}+\text{Na}]^+$ : 438.2437, found 438.2436.

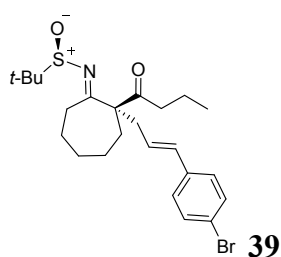

*(R)*-N-((*R,E*)-2-((*E*)-3-(4-bromophenyl)allyl)-2-butyl)cycloheptylidene)-2-methylpropane-2-sulfinamide **39**:

80% yield, yellow oil.  $[\alpha]_{21}^D = +114.60$  (c 2.1,  $\text{CHCl}_3$ ). IR (KBr)  $\nu_{\text{max}}$ : 2958, 2927, 2360, 2341, 1707, 1611, 1507, 1458, 1261, 1009, 801, 750.  $\text{cm}^{-1}$ .  $^1\text{H}$  NMR (400 MHz, Chloroform-*d*)  $\delta$  7.39 (d,  $J = 8.1$  Hz, 2H), 7.14 (d,  $J = 8.1$  Hz, 2H), 6.34 (d,  $J = 15.7$  Hz, 1H), 5.99 (dt,  $J = 15.4, 7.4$  Hz, 1H), 3.21 – 2.93 (m, 2H), 2.53 (dd,  $J = 14.7, 8.0$  Hz, 1H), 2.43 (td,  $J = 7.2, 3.4$  Hz, 2H), 2.30 (td,  $J = 11.7, 3.1$  Hz, 1H), 2.15 (dd,  $J = 15.2, 10.1$  Hz, 1H), 1.95 – 1.83 (m, 2H), 1.79 – 1.55 (m, 5H), 1.49 – 1.42 (m, 1H), 1.31 (m, 10H), 0.85 (t,  $J = 7.4$  Hz, 3H).  $^{13}\text{C}$  NMR (100 MHz, Chloroform-*d*)  $\delta$  209.1, 187.5, 136.0, 132.6, 131.7, 127.7, 126.3, 121.2, 68.2, 57.4, 40.4, 39.0, 35.0, 30.8, 30.0, 28.9,

23.63, 22.8, 17.4, 13.9. HRMS (ESI) calculated for  $C_{24}H_{34}BrNNaO_2S^+$   $[M+Na]^+$ : 502.1386, found 502.1385.

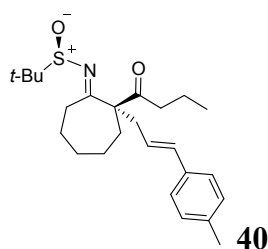

(*R*)-*N*-((*R,E*)-2-butryl-2-((*E*)-3-(*p*-tolyl)allyl)cycloheptylidene)-2-methylpropane-2-sulfinamide **40**:

90% yield, yellow oil.  $[\alpha]_{22}^D = +181.36$  (c 2.3,  $CHCl_3$ ). IR (KBr)  $\nu_{max}$ : 2960, 2928, 2358, 2341, 1709, 1616, 1507, 1458, 1260, 1011, 801, 750.  $cm^{-1}$ .  $^1H$  NMR (400 MHz, Chloroform-*d*)  $\delta$  7.18 (d,  $J = 8.1$  Hz, 2H), 7.08 (d,  $J = 7.9$  Hz, 2H), 6.38 (d,  $J = 15.7$  Hz, 1H), 5.93 (ddd,  $J = 15.3, 8.0, 6.7$  Hz, 1H), 3.23 – 2.93 (m, 2H), 2.54 (ddd,  $J = 14.6, 8.0, 1.3$  Hz, 1H), 2.44 (td,  $J = 7.1, 1.7$  Hz, 2H), 2.31 (m, 4H), 2.16 (dd,  $J = 15.2, 10.1$  Hz, 1H), 1.91 (m, 2H), 1.79 – 1.55 (m, 5H), 1.49 – 1.42 (m, 1H), 1.31 (m, 10H), 0.85 (t,  $J = 7.4$  Hz, 3H).  $^{13}C$  NMR (100 MHz, Chloroform-*d*)  $\delta$  209.2, 187.7, 137.3, 134.3, 133.6, 129.3, 126.1, 124.2, 68.3, 57.4, 40.3, 39.0, 35.0, 30.6, 30.0, 29.0, 23.6, 22.8, 21.3, 17.4, 13.9. HRMS (ESI) calculated for  $C_{25}H_{37}NNaO_2S^+$   $[M+Na]^+$ : 438.2437, found 438.2435.

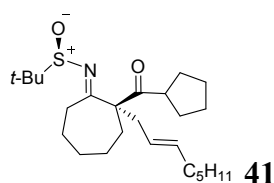

(*R*)-*N*-((*R,E*)-2-isobutyryl-2-((*E*)-oct-2-en-1-yl)cycloheptylidene)-2-methylpropane-2-sulfinamide **41**:

89% yield, yellow oil.  $[\alpha]_{21}^D = +261.01$  (c 1.1,  $CHCl_3$ ). IR (KBr)  $\nu_{max}$ : 2960, 2929, 2867, 1706, 1610, 1457, 1362, 1262, 1182, 1080, 801  $cm^{-1}$ .  $^1H$  NMR (400 MHz, Chloroform-*d*)  $\delta$  5.44 (dt,  $J = 14.2, 6.7$  Hz, 1H), 5.16 – 5.08 (m, 1H), 3.29 – 3.03 (m, 2H), 2.95 (dd,  $J = 14.7, 6.6$  Hz, 1H), 2.28 (dd,  $J = 14.6, 8.0$  Hz, 1H), 2.11 (ddd,  $J = 24.0, 15.0, 11.0$  Hz, 2H), 1.92 (m, 4H), 1.77 – 1.67 (m, 6H), 1.62 – 1.47 (m, 3H), 1.42 – 1.15 (m, 19H), 0.86 (t,  $J = 6.8$  Hz, 3H).  $^{13}C$  NMR (100 MHz, Chloroform-*d*)  $\delta$  213.8, 187.3, 135.4, 124.6, 68.9, 57.5, 46.2, 38.0, 35.6, 33.0, 32.7, 31.5, 31.5, 30.1, 29.6, 29.2,



29.1, 26.8, 26.6, 23.3, 22.9, 22.6, 14.2. HRMS (ESI) calculated for  $C_{23}H_{41}NNaO_2S^+$   $[M+Na]^+$ : 444.2907, found 444.2903.

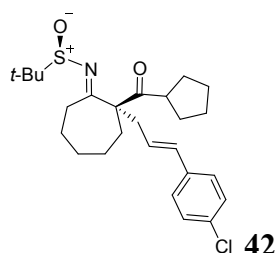

(*R*)-*N*-((*R,E*)-2-((*E*)-3-(4-chlorophenyl)allyl)-2-(cyclopentanecarbonyl) cycloheptylidene)-2-methylpropane-2-sulfinamide **42**:

93% yield, yellow oil.  $[\alpha]_{20}^D = +652.80$  (c 0.4,  $CHCl_3$ ). IR (KBr)  $\nu_{max}$ : 2958, 2864, 2358, 2340, 1707, 1609, 1509, 1457, 1260, 1082, 964, 800, 775.  $cm^{-1}$ .  $^1H$  NMR (400 MHz, Chloroform-*d*)  $\delta$  7.24 (d,  $J = 8.6$  Hz, 2H), 7.21 – 7.15 (m, 2H), 6.35 (d,  $J = 15.7$  Hz, 1H), 5.92 (ddd,  $J = 15.4, 8.1, 6.8$  Hz, 1H), 3.31 – 2.98 (m, 3H), 2.52 (ddd,  $J = 14.7, 8.1, 1.3$  Hz, 1H), 2.25 – 2.06 (m, 2H), 1.93 (td,  $J = 15.1, 14.4, 8.3$  Hz, 2H), 1.83 – 1.36 (m, 13H), 1.33 (s, 9H), 1.25 – 1.20 (m, 1H).  $^{13}C$  NMR (100 MHz, Chloroform-*d*)  $\delta$  213.7, 181.7, 135.6, 133.1, 132.6, 128.8, 127.4, 126.1, 68.8, 57.5, 46.5, 38.5, 35.6, 33.0, 31.7, 30.1, 30.0, 29.4, 26.8, 26.7, 23.4, 22.8. HRMS (ESI) calculated for  $C_{26}H_{36}ClNNaO_2S^+$   $[M+Na]^+$ : 484.2047, found 484.2046.

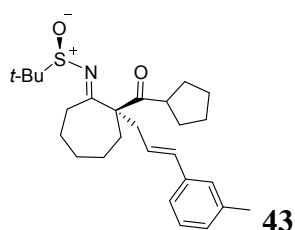

(*R*)-*N*-((*R,E*)-2-(cyclopentanecarbonyl)-2-((*E*)-3-(*m*-tolyl)allyl)cycloheptylidene)-2-methylpropane-2-sulfinamide **43**:

81% yield, yellow oil.  $[\alpha]_{21}^D = +199.30$  (c 0.8,  $CHCl_3$ ). IR (KBr)  $\nu_{max}$ : 2953, 2864, 2360, 2342, 1703, 1606, 1507, 1456, 1261, 1082, 964, 800, 775, 692  $cm^{-1}$ .  $^1H$  NMR (400 MHz, Chloroform-*d*)  $\delta$  7.17 (t,  $J = 7.6$  Hz, 1H), 7.11 – 7.01 (m, 3H), 6.37 (d,  $J = 15.7$  Hz, 1H), 5.93 (ddd,  $J = 15.3, 8.1, 6.8$  Hz, 1H), 3.37 – 3.04 (m, 3H), 2.53 (ddd,  $J = 14.6, 8.1, 1.3$  Hz, 1H), 2.32 (s, 4H), 2.17 (ddd,  $J = 19.6, 15.3, 11.1$  Hz, 2H), 2.02 – 1.90 (m, 2H), 1.74 (m, 8H), 1.57 – 1.40 (m, 4H), 1.34 (s, 9H).  $^{13}C$  NMR (100 MHz, Chloroform-*d*)  $\delta$  213.8, 187.2, 138.2, 137.1, 133.9, 128.5, 128.3, 126.9, 125.0, 123.4,

69.0, 57.5, 46.4, 38.6, 35.6, 33.0, 31.7, 30.1, 29.8, 29.5, 26.8, 26.7, 23.4, 22.7, 21.5.  
HRMS (ESI) calculated for  $C_{27}H_{39}NNaO_2S^+$   $[M+Na]^+$ : 464.2594, found 464.2596.

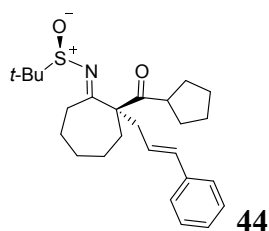

N-((*R,E*)-2-cinnamyl-2-(cyclopentanecarbonyl)cycloheptylidene)-2-methylpropane-2-sulfinamide **44**:

79% yield, yellow oil.  $[\alpha]_{23}^D = +201.61$  (c 0.9,  $CHCl_3$ ). IR (KBr)  $\nu_{max}$ : 2952, 2860, 2361, 2344, 1709, 1603, 1501, 1453, 1263, 1091, 959, 803, 769  $cm^{-1}$ .  $^1H$  NMR (400 MHz, Chloroform-*d*)  $\delta$  7.46 – 7.28 (m, 2H), 7.27 – 7.11 (m, 3H), 6.41 (d,  $J = 15.6$  Hz, 1H), 5.96 (dt,  $J = 15.4, 7.5$  Hz, 1H), 3.18 (ddd,  $J = 27.9, 15.8, 7.1$  Hz, 3H), 2.55 (dd,  $J = 14.8, 8.1$  Hz, 1H), 2.26 – 2.07 (m, 2H), 1.94 (dd,  $J = 15.3, 8.7$  Hz, 2H), 1.77 – 1.63 (m, 7H), 1.55 (q,  $J = 7.9, 7.4$  Hz, 2H), 1.43 (q,  $J = 5.7, 5.0$  Hz, 2H), 1.34 (d,  $J = 2.0$  Hz, 9H), 1.29 – 1.18 (m, 2H).  $^{13}C$  NMR (101 MHz, Chloroform-*d*)  $\delta$  213.6, 187.1, 137.1, 133.8, 128.5, 127.4, 126.1, 125.3, 68.8, 57.4, 46.4, 38.5, 35.5, 32.9, 31.6, 30.0, 29.8, 29.3, 26.7, 26.6, 23.4, 22.8. HRMS (ESI) calculated for  $C_{26}H_{37}NNaO_2S^+$   $[M+Na]^+$ : 450.2437, found 450.2433.

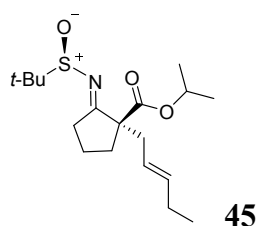

isopropyl (*R,E*)-2-(((*R*)-*tert*-butylsulfinyl)imino)-1-((*E*)-pent-2-en-1-yl)cyclopentane-1-carboxylate **45**:

66% yield, yellow oil.  $[\alpha]_{26}^D = +151.61$  (c 0.7,  $CHCl_3$ ). IR (KBr)  $\nu_{max}$ : 2962, 2927, 1731, 1637, 1458, 1106, 1085, 789  $cm^{-1}$ .  $^1H$  NMR (400 MHz, Chloroform-*d*)  $\delta$  5.54 (dt,  $J = 15.2, 6.2, 1.2$  Hz, 1H), 5.41 – 5.25 (m, 1H), 4.99 (m, 1H), 3.01 – 2.85 (m, 1H), 2.75 – 2.64 (m, 2H), 2.33 – 2.27 (m, 1H), 2.26 – 2.19 (m, 1H), 1.99 (tt,  $J = 7.6, 1.3$  Hz, 2H), 1.94 – 1.79 (m, 3H), 1.24 (s, 9H), 1.22 – 1.18 (m, 6H), 0.94 (t,  $J = 7.5$  Hz, 3H).  $^{13}C$  NMR (100 MHz, Chloroform-*d*)  $\delta$  191.6, 172.0, 136.8, 123.8, 68.7, 61.4, 57.3, 38.8,

33.9, 32.4, 25.8, 22.7, 22.4, 21.8, 13.9. HRMS (ESI) calculated for  $C_{18}H_{31}NNaO_3S^+$   $[M+Na]^+$ : 364.1917, found 364.1919.

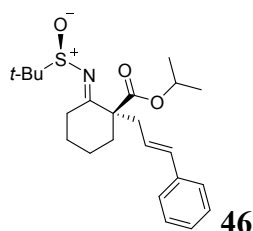

Isopropyl (*R,E*)-2-(((*R*)-*tert*-butylsulfinyl) imino) -1-cinnamyl cyclohexane-1-carboxylate **46**:

79% yield, yellow oil.  $[\alpha]_{26}^D = +62.61$  (c 3.0,  $CHCl_3$ ). IR (KBr)  $\nu_{max}$ : 2979, 2935, 2866, 1730, 1629, 1257, 1103, 1079, 966, 743, 789  $cm^{-1}$ .  $^1H$  NMR (400 MHz, Chloroform-*d*)  $\delta$  7.31 – 7.26 (m, 4H), 7.19 (td,  $J = 5.9, 2.6$  Hz, 1H), 6.37 (d,  $J = 15.7$  Hz, 1H), 6.17 (dt,  $J = 15.4, 7.4$  Hz, 1H), 5.03 (m, 1H), 3.77 (dt,  $J = 14.1, 3.9$  Hz, 1H), 2.76 (ddd,  $J = 14.0, 7.1, 1.3$  Hz, 1H), 2.59 – 2.44 (m, 2H), 2.22 (ddd,  $J = 14.3, 12.6, 5.1$  Hz, 1H), 1.92 – 1.83 (m, 1H), 1.71 – 1.45 (m, 4H), 1.31 (s, 9H), 1.20 (dd,  $J = 11.9, 6.3$  Hz, 6H).  $^{13}C$  NMR (100 MHz, Chloroform-*d*)  $\delta$  183.6, 171.8, 137.4, 133.3, 128.6, 127.3, 126.2, 125.4, 68.9, 59.4, 58.1, 40.1, 36.12, 32.2, 27.2, 22.9, 22.5, 21.9, 21.8. HRMS (ESI) calculated for  $C_{23}H_{33}NNaO_3S^+$   $[M+Na]^+$ : 426.2073, found 426.2079.

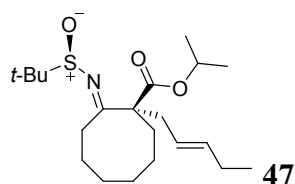

isopropyl (*R,E*)-2-(((*R*)-*tert*-butylsulfinyl)imino)-1-((*E*)-pent-2-en-1-yl)cyclooctane-1-carboxylate **47**:

59% yield, yellow oil.  $[\alpha]_{26}^D = +189.09$  (c 0.1,  $CHCl_3$ ). IR (KBr)  $\nu_{max}$ : 2959, 2925, 2856, 1730, 1609, 1464, 1104, 1089, 801.  $cm^{-1}$ .  $^1H$  NMR (400 MHz, Chloroform-*d*)  $\delta$  5.52 (dt,  $J = 13.5, 6.3$  Hz, 1H), 5.30 (dt,  $J = 14.9, 7.5$  Hz, 1H), 4.98 (p,  $J = 6.3$  Hz, 1H), 2.85 (dt,  $J = 12.5, 4.7$  Hz, 2H), 2.49 – 2.36 (m, 2H), 2.35 – 2.26 (m, 1H), 2.13 – 1.84 (m, 5H), 1.79 – 1.59 (m, 3H), 1.57 – 1.35 (m, 3H), 1.26 (s, 9H), 1.18 (dd,  $J = 12.8, 6.3$  Hz, 6H), 0.94 (t,  $J = 7.4$  Hz, 3H).  $^{13}C$  NMR (100 MHz, Chloroform-*d*)  $\delta$  189.6, 171.9, 136.1, 124.2, 68.8, 61.5, 56.8, 36.3, 33.6, 30.5, 27.7, 25.8, 25.2, 24.8, 23.1, 22.3, 21.9, 21.8, 13.9. HRMS (ESI) calculated for  $C_{21}H_{37}NNaO_3S^+$   $[M+Na]^+$ : 406.2386, found 406.2389.

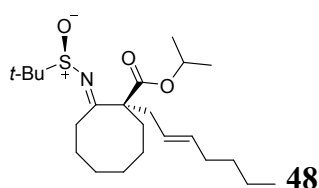

isopropyl (*R,E*)-2-(((*R*)-*tert*-butylsulfinyl)imino)-1-((*E*)-hept-2-en-1-yl)cyclooctane-1-carboxylate **48**:

62% yield, yellow oil.  $[\alpha]_{26}^D = +99.69$  (c 0.6,  $\text{CHCl}_3$ ). IR (KBr)  $\nu_{\text{max}}$ : 2958, 2926, 2850, 2359, 1730, 1608, 1466, 1260, 1104, 804.  $\text{cm}^{-1}$ .  $^1\text{H}$  NMR (400 MHz, Chloroform-*d*)  $\delta$  5.47 (dt,  $J = 14.1, 6.7$  Hz, 1H), 5.33 – 5.26 (m, 1H), 4.97 (p,  $J = 6.3$  Hz, 1H), 2.84 (dt,  $J = 12.5, 4.8$  Hz, 2H), 2.42 (ddd,  $J = 13.7, 10.2, 5.0$  Hz, 2H), 2.30 (ddd,  $J = 15.4, 11.5, 3.7$  Hz, 1H), 2.08 – 1.89 (m, 5H), 1.80 – 1.62 (m, 3H), 1.58 – 1.36 (m, 4H), 1.26 (s, 12H), 1.17 (dd,  $J = 13.0, 6.2$  Hz, 6H), 0.91 – 0.84 (m, 3H).  $^{13}\text{C}$  NMR (100 MHz, Chloroform-*d*)  $\delta$  189.6, 171.9, 134.6, 125.2, 68.8, 61.4, 56.8, 36.3, 33.5, 32.5, 31.7, 30.5, 27.6, 25.2, 24.8, 23.1, 22.3, 22.3, 21.9, 21.8, 14.1. HRMS (ESI) calculated for  $\text{C}_{23}\text{H}_{41}\text{NNaO}_3\text{S}^+$   $[\text{M}+\text{Na}]^+$ : 434.2699, found 434.2697.

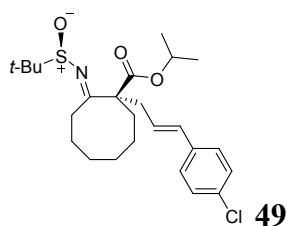

isopropyl (*R,E*)-2-(((*R*)-*tert*-butylsulfinyl)imino)-1-((*E*)-3-(4-chlorophenyl)allyl)cyclooctane-1-carboxylate **49**:

80% yield, yellow oil.  $[\alpha]_{26}^D = +142.69$  (c 0.7,  $\text{CHCl}_3$ ). IR (KBr)  $\nu_{\text{max}}$ : 2979, 2931, 2862, 2362, 1730, 1608, 1491, 1191, 1089, 967.  $\text{cm}^{-1}$ .  $^1\text{H}$  NMR (400 MHz, Chloroform-*d*)  $\delta$  7.26 – 7.15 (m, 4H), 6.37 (d,  $J = 15.7$  Hz, 1H), 6.13 (ddd,  $J = 15.4, 8.5, 6.3$  Hz, 1H), 4.99 (m, 1H), 3.07 (dd,  $J = 14.5, 6.4$  Hz, 1H), 2.89 (dt,  $J = 13.1, 4.9$  Hz, 1H), 2.60 (dd,  $J = 14.5, 8.6$  Hz, 1H), 2.52 – 2.28 (m, 2H), 2.18 – 1.85 (m, 3H), 1.82 – 1.63 (m, 3H), 1.62 – 1.36 (m, 3H), 1.28 (s, 9H), 1.16 (dd,  $J = 6.3, 4.0$  Hz, 6H).  $^{13}\text{C}$  NMR (100 MHz, Chloroform-*d*)  $\delta$  189.4, 171.8, 135.9, 132.9, 132.1, 128.8, 127.4, 126.9, 69.1, 61.5, 56.9, 37.0, 33.6, 30.5, 28.4, 25.2, 24.8, 23.3, 22.3, 21.9, 21.8. HRMS (ESI) calculated for  $\text{C}_{25}\text{H}_{36}\text{ClNNaO}_3\text{S}^+$   $[\text{M}+\text{Na}]^+$ : 488.1997, found 488.1998.

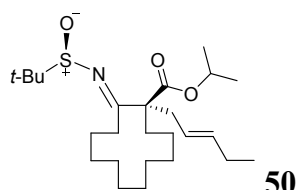

isopropyl (*R,E*)-2-(((*R*)-*tert*-butylsulfinyl)imino)-1-((*E*)-pent-2-en-1-yl)cyclododecane-1-carboxylate **50**:

42% yield, yellow oil.  $[\alpha]_{26}^D = +78.12$  (c 0.5,  $\text{CHCl}_3$ ). IR (KBr)  $\nu_{\text{max}}$ : 2962, 2931, 2361, 1734, 1637, 1458, 1192, 913.  $\text{cm}^{-1}$ .  $^1\text{H}$  NMR (400 MHz, Chloroform-*d*)  $\delta$  5.50 (dt,  $J = 13.9, 6.5$  Hz, 1H), 5.19 (dt,  $J = 15.1, 7.5$  Hz, 1H), 4.99 (m, 1H), 3.33 (ddd,  $J = 13.6, 9.9, 7.2$  Hz, 1H), 2.59 – 2.37 (m, 2H), 2.14 (dt,  $J = 12.9, 5.8$  Hz, 1H), 2.07 – 1.76 (m, 5H), 1.67 (dd,  $J = 13.7, 6.5$  Hz, 3H), 1.58 – 1.34 (m, 10H), 1.31 (s, 11H), 1.19 (t,  $J = 6.0$  Hz, 6H), 0.94 (t,  $J = 7.4$  Hz, 3H).  $^{13}\text{C}$  NMR (100 MHz, Chloroform-*d*)  $\delta$  183.2, 172.5, 136.3, 123.7, 68.7, 36.1, 30.6, 29.8, 26.8, 26.0, 25.9, 25.4, 25.1, 24.4, 23.9, 23.7, 23.1, 21.9, 21.6, 20.0, 14.0. HRMS (ESI) calculated for  $\text{C}_{25}\text{H}_{45}\text{NNaO}_3\text{S}^+$   $[\text{M}+\text{Na}]^+$ : 462.3021, found 462.3027.

#### 4. Preparation $\beta$ -amino acid **21** from product **13**

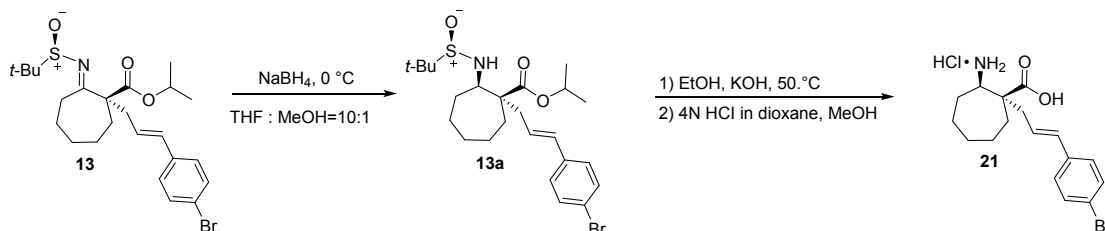

isopropyl (1*R*,2*R*)-1-((*E*)-3-(4-bromophenyl)allyl)-2-(((*R*)-*tert*-butylsulfinyl)amino)cyclo heptane-1-carboxylate **13a**:

In a round bottom flask, a solution of compound **13** (0.6 g, 1.2 mmol) in fresh distilled THF (12 mL) and MeOH (1.2 mL) was mixed with  $\text{NaBH}_4$  (136mg, 3.6mmol) in a nitrogen atmosphere at 0°C. After the substrate was completely consumed (monitored by TLC analysis), the reaction mixture was quenched with  $\text{H}_2\text{O}$  (10 mL), and extracted by ethyl acetate (3 x 20 mL). The combined organic phase was dried over  $\text{Na}_2\text{SO}_4$ , and concentrated in *vacuo*. The residue was purified by flash column chromatography on silica gel (petroleum ether: ethyl acetate=4:1) to furnish the desired compound **13a** (542 mg, 91% yield) as a colorless oil.  $[\alpha]_{24}^D = -43.32$  (c 1.8,  $\text{CHCl}_3$ ). IR (KBr)  $\nu_{\text{max}}$ : 2930, 2863, 2360, 2342, 1716, 1684, 1507, 1457, 1174, 1105, 1009, 968, 800  $\text{cm}^{-1}$ .  $^1\text{H}$  NMR (400 MHz, Chloroform-*d*)  $\delta$  7.43 – 7.36 (m, 2H), 7.25 – 7.16 (m, 2H), 6.48 (d,  $J = 15.7$  Hz, 1H), 6.22 (dt,  $J = 15.5, 7.6$  Hz, 1H), 5.03 (m, 1H), 4.61 (d,  $J = 7.1$  Hz, 1H), 3.26

---

(ddd,  $J = 9.8, 7.1, 2.6$  Hz, 1H), 2.77 – 2.60 (m, 2H), 2.10 – 1.63 (m, 6H), 1.60 – 1.35 (m, 4H), 1.24 (d,  $J = 6.3$  Hz, 6H), 1.21 (s, 9H).  $^{13}\text{C}$  NMR (100 MHz, Chloroform- $d$ )  $\delta$  175.3, 136.5, 132.9, 131.6, 127.8, 126.2, 120.9, 68.5, 62.7, 55.8, 53.7, 41.1, 34.0, 32.5, 27.4, 24.9, 22.9, 22.6, 22.0, 21.9. HRMS (ESI) calculated for  $\text{C}_{24}\text{H}_{36}\text{BrNNaO}_3\text{S}^+$   $[\text{M}+\text{Na}]^+$ : 520.1491, found 520.1493.

(1*R*,2*R*)-2-amino-1-((*E*)-3-(4-bromophenyl)allyl) cycloheptane-1-carboxylic acid hydro- chloride **21**:

The compound **13a** (330 mg, 0.66 mmol) of methanol (3.3mL) was added 1,4-dioxane (0.66 mL) of 4.0 M HCl. The mixture was stirred at room temperature for 2 hours. The mixture was completely evaporated in *vacuo*. A white solid precipitated and washed with ethyl acetate. Filtered to give product **21** (192 mg, 83% yield) as a white solid.  $[\alpha]_{\text{D}}^{22} = +2.61$  (c 0.3, MeOH). m. p. 103.7 °C -105.8 °C. IR (KBr)  $\nu_{\text{max}}$ : 2987, 2360, 2342, 2330, 1792, 1733, 1684, 1541, 1507, 1457  $\text{cm}^{-1}$ .  $^1\text{H}$  NMR (400 MHz, Methanol- $d_4$ )  $\delta$  7.52 – 7.41 (m, 2H), 7.33 (d,  $J = 8.5$  Hz, 2H), 6.55 (d,  $J = 15.7$  Hz, 1H), 6.30 (dt,  $J = 15.4, 7.5$  Hz, 1H), 3.27 (dd,  $J = 10.0, 2.5$  Hz, 1H), 2.77 (ddd,  $J = 14.1, 7.0, 1.4$  Hz, 1H), 2.61 (dd,  $J = 14.1, 8.0$  Hz, 1H), 2.16 – 1.51 (m, 10H).  $^{13}\text{C}$  NMR (100 MHz, Methanol- $d_4$ )  $\delta$  177.4, 137.5, 134.8, 132.7, 129.1, 125.7, 122.2, 58.4, 52.6, 41.6, 34.1, 31.1, 27.7, 25.3, 23.3. HRMS (ESI) calculated for  $\text{C}_{17}\text{H}_{22}\text{BrNNaO}_2^+$   $[\text{M}+\text{Na}]^+$ : 374.0726, found 374.0724.

## 5. NMR Spectrums of Compounds

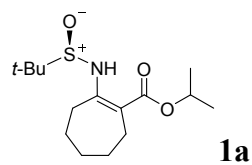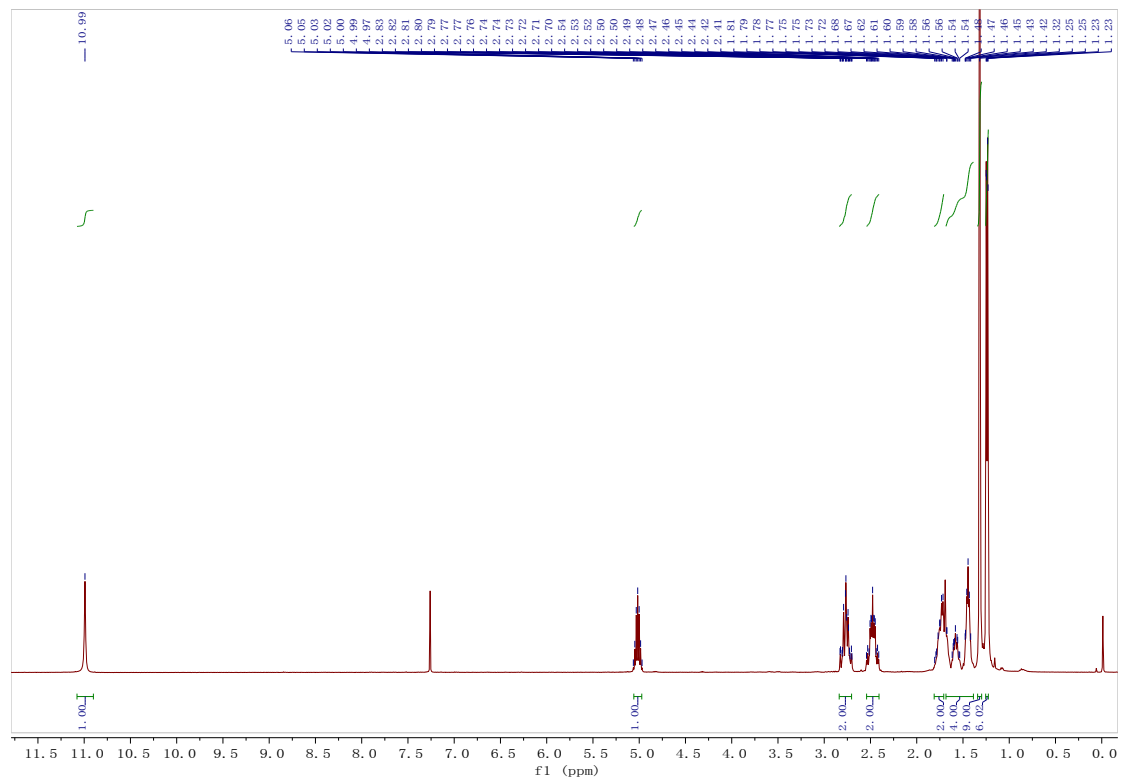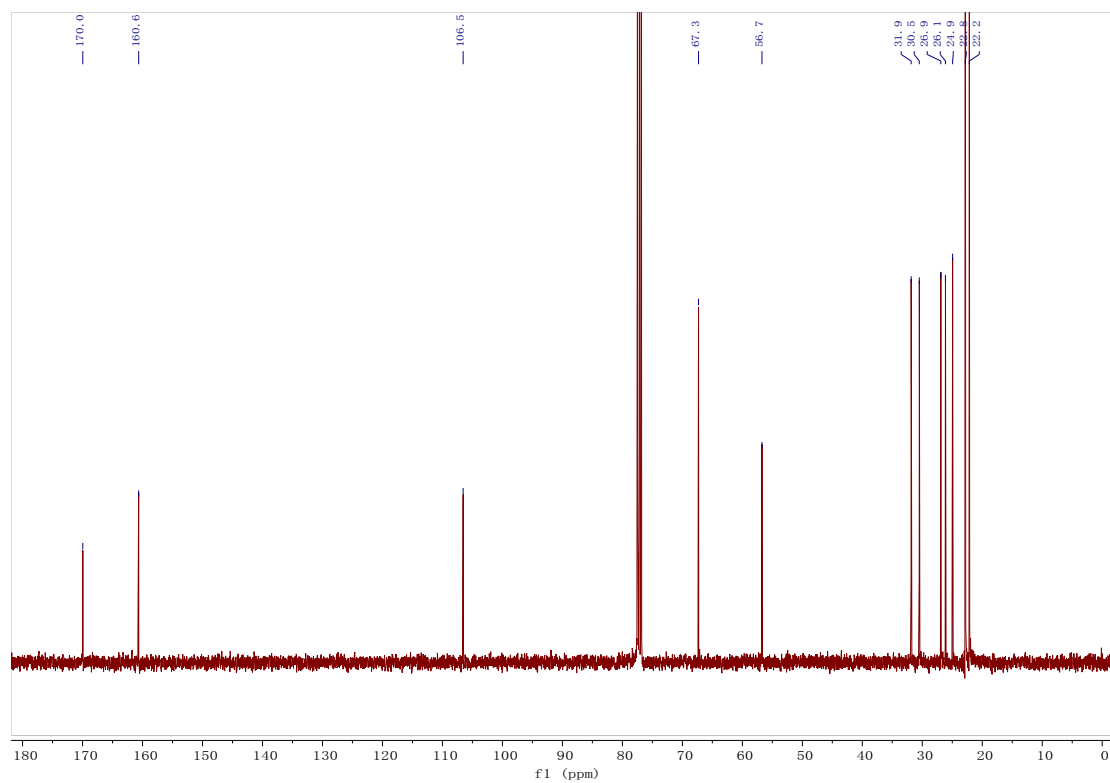

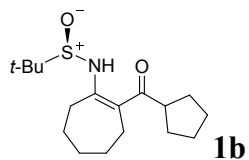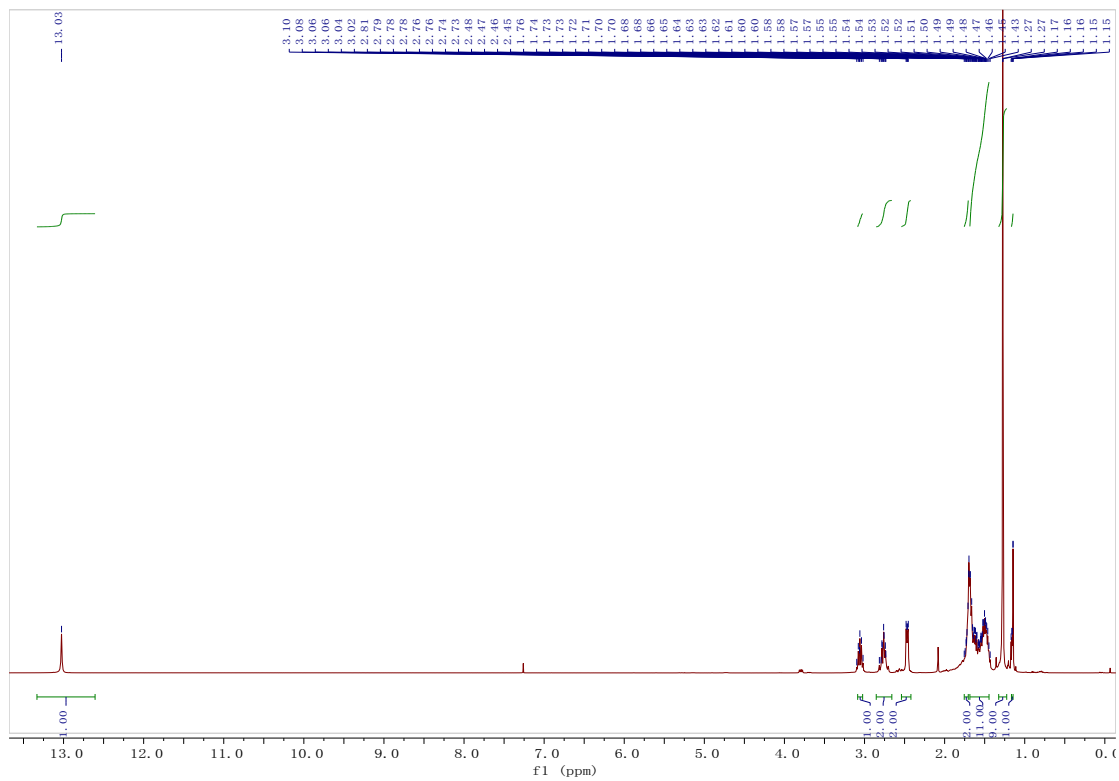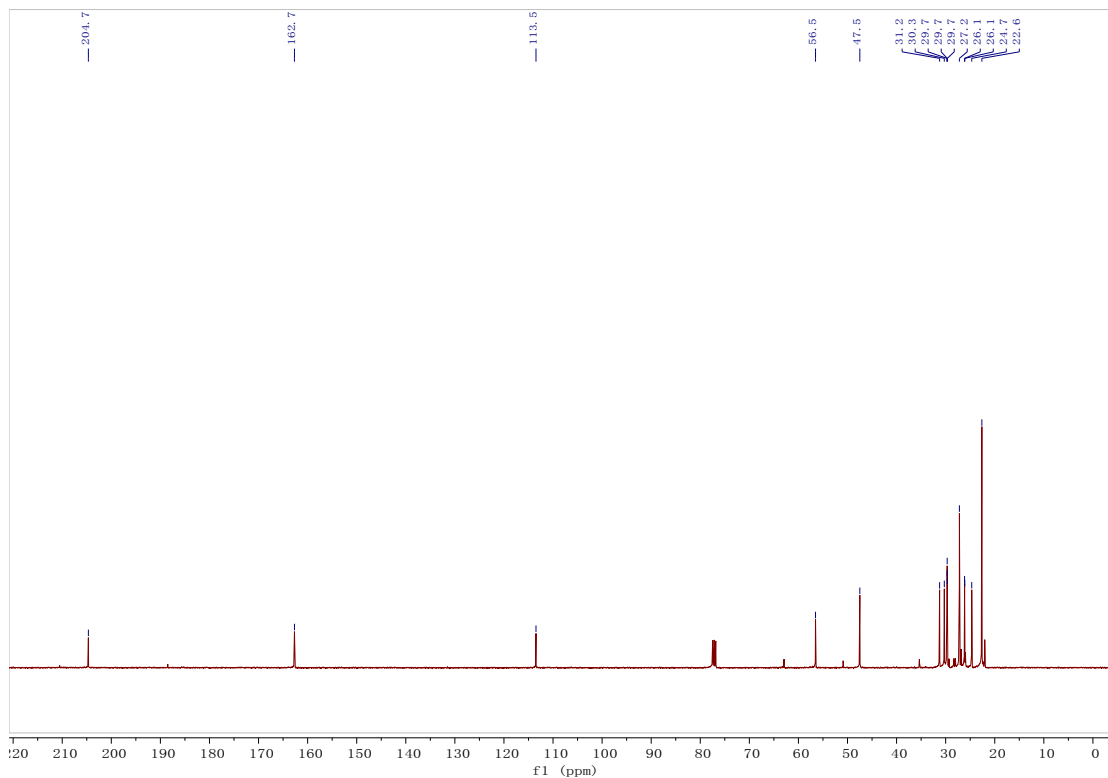



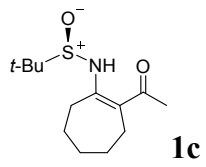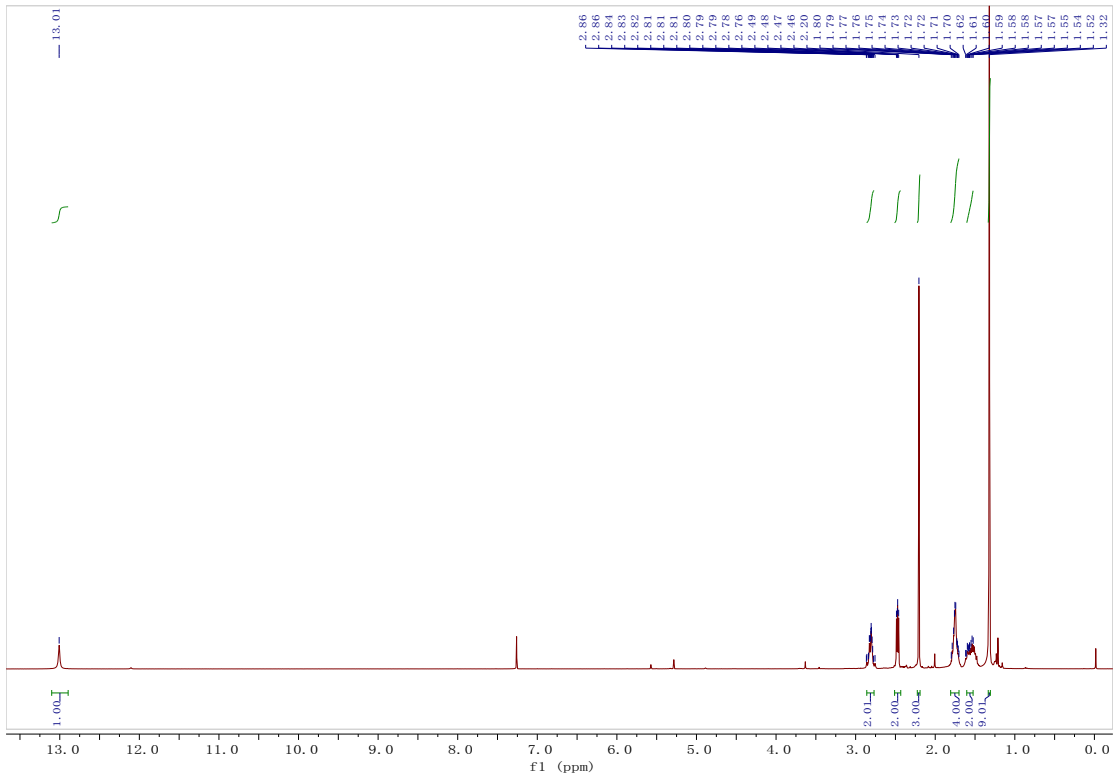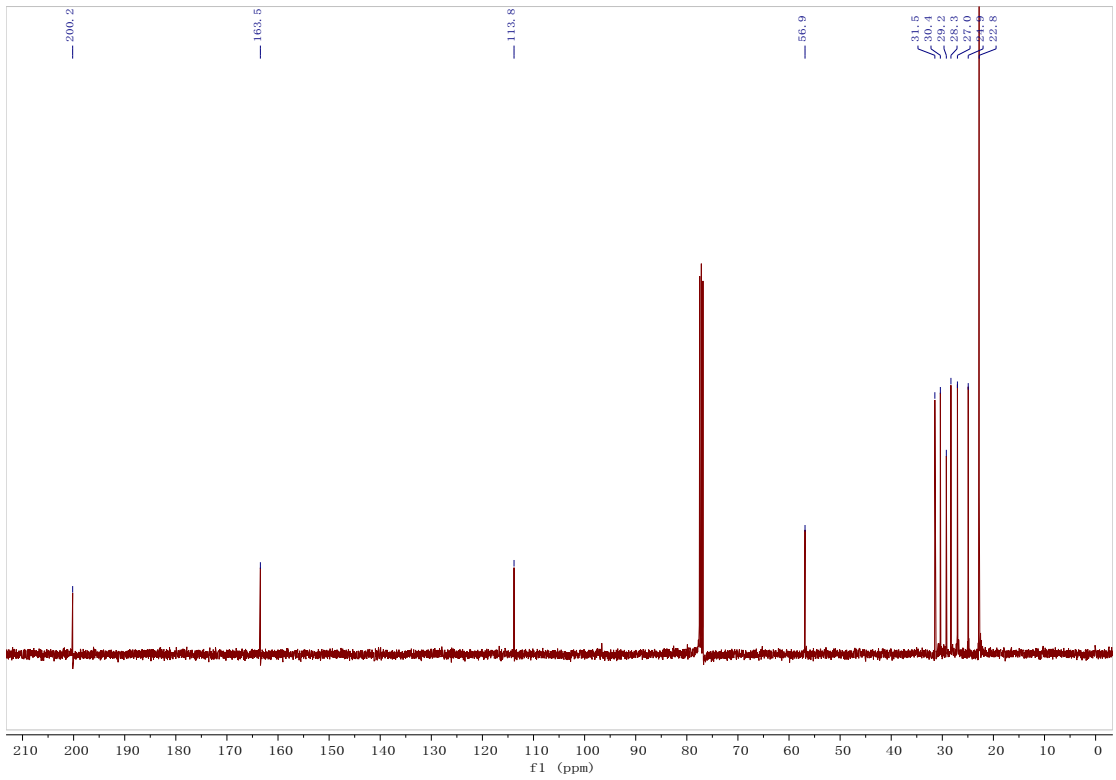

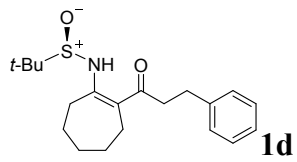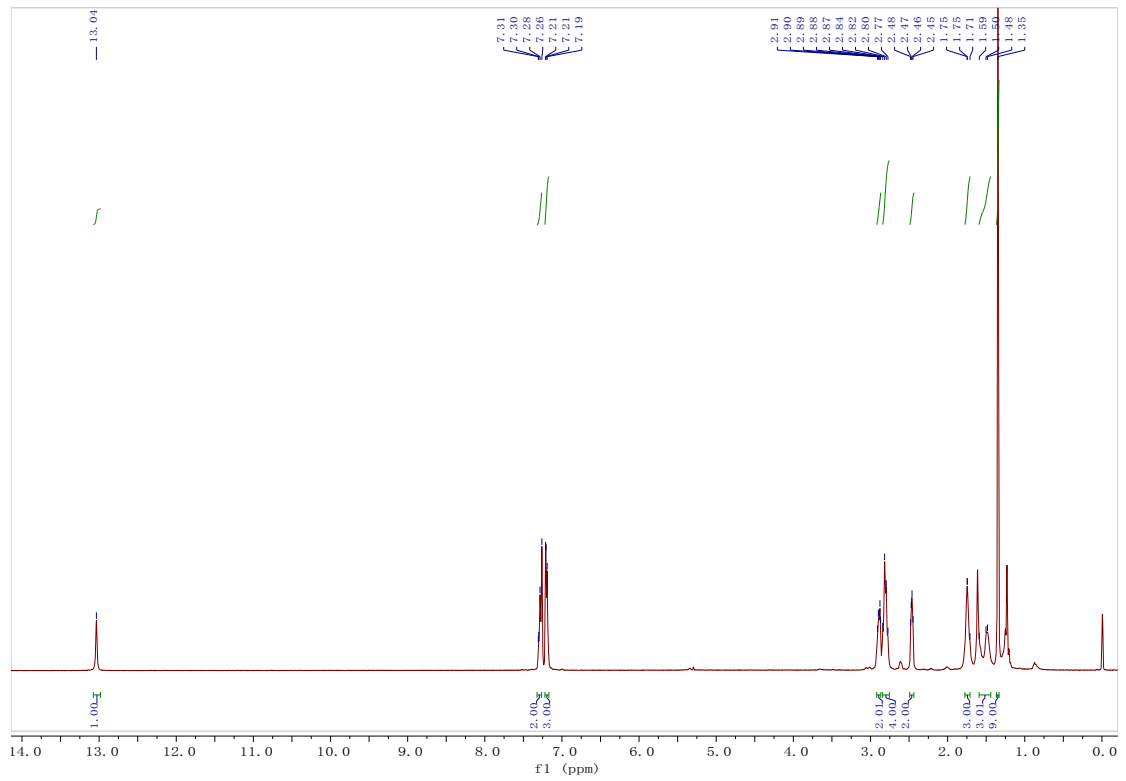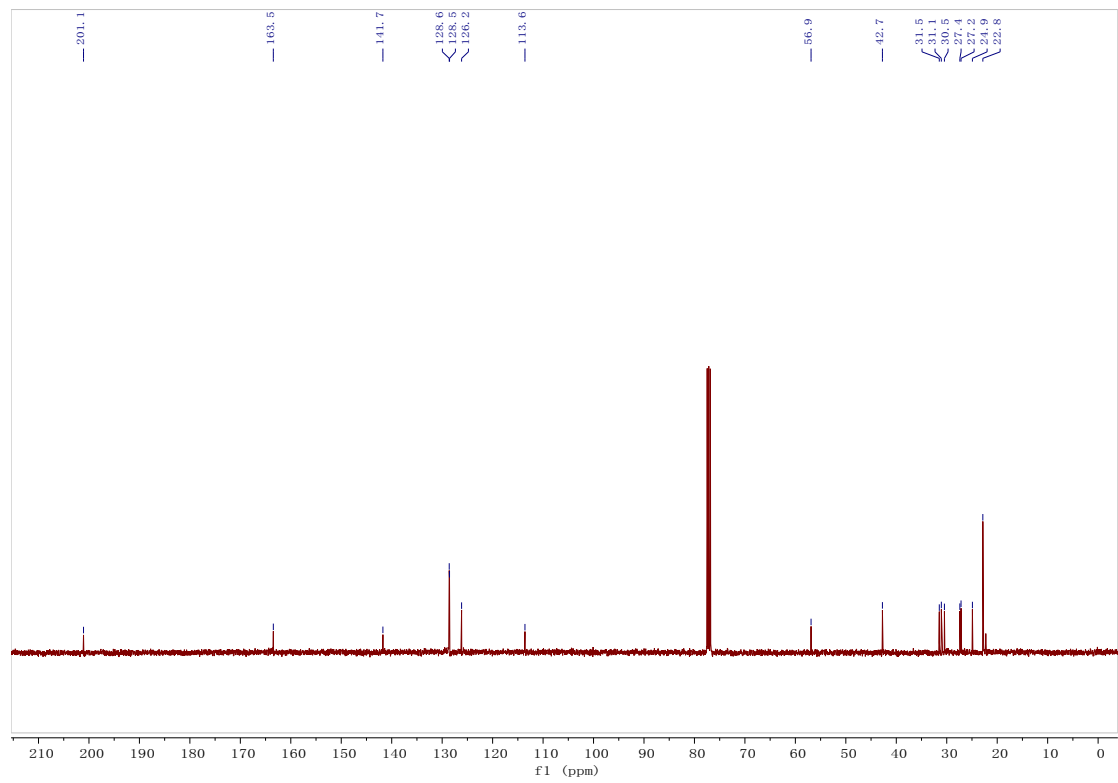

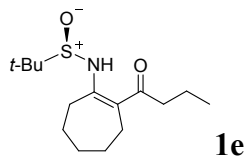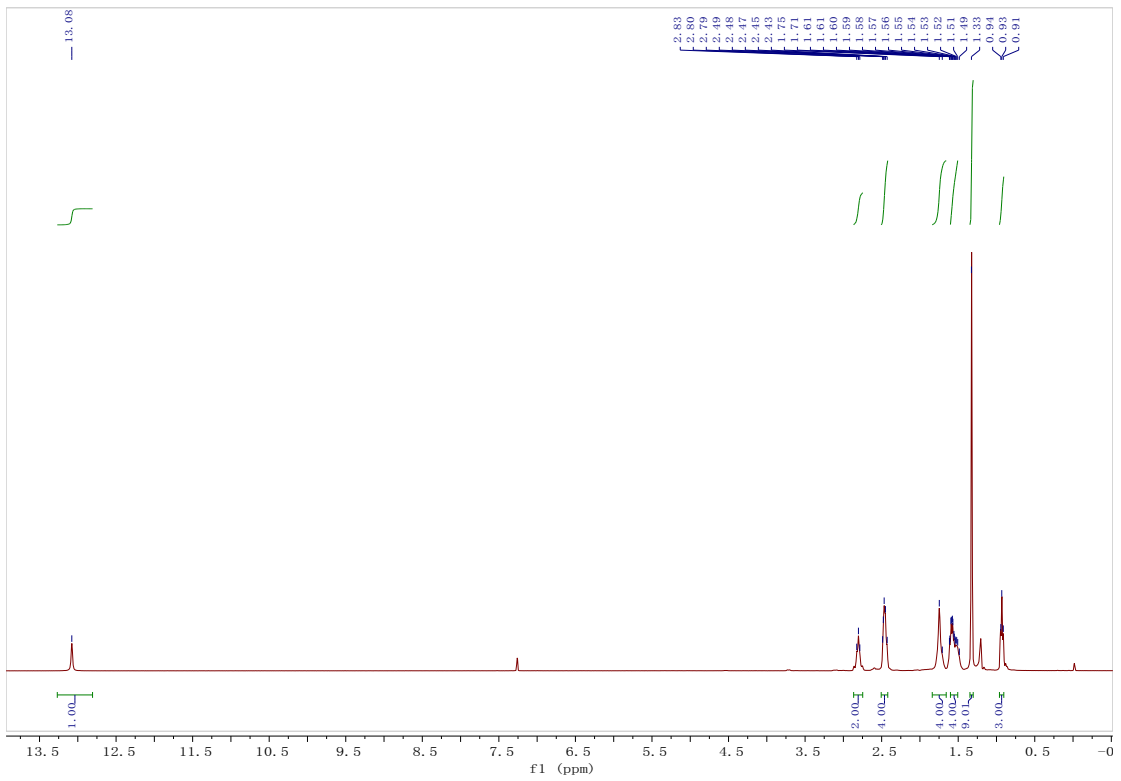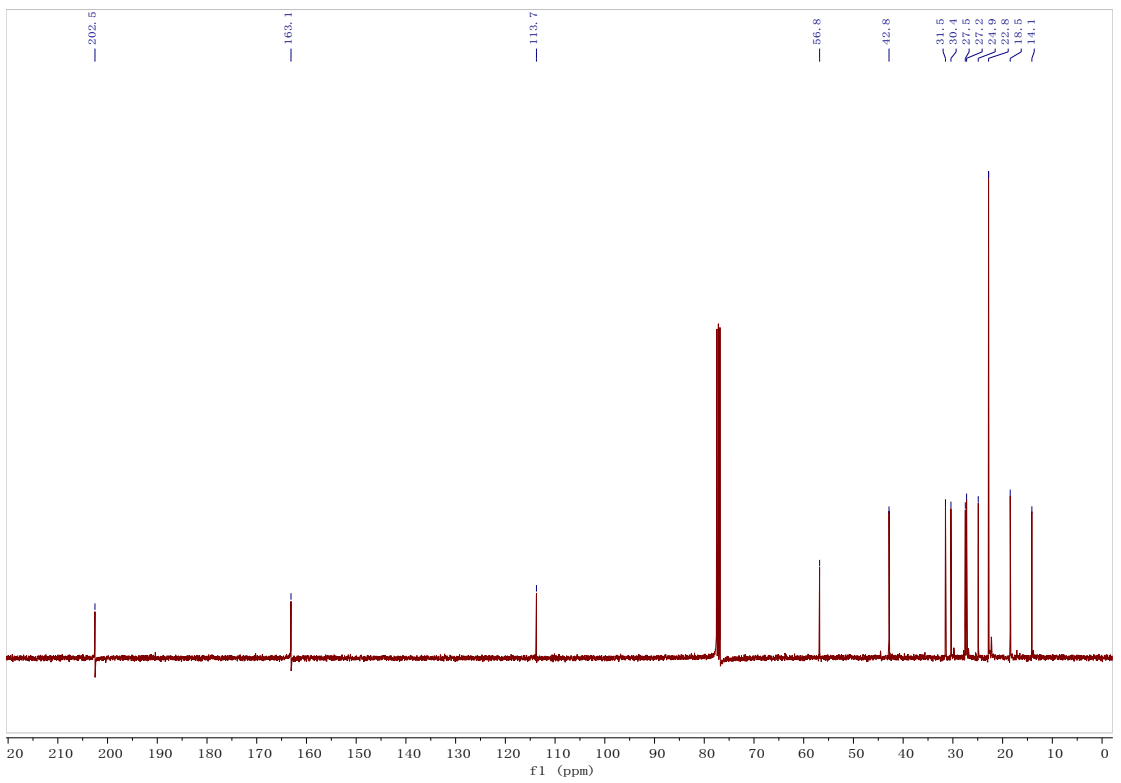

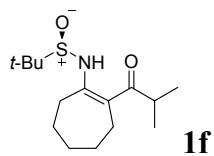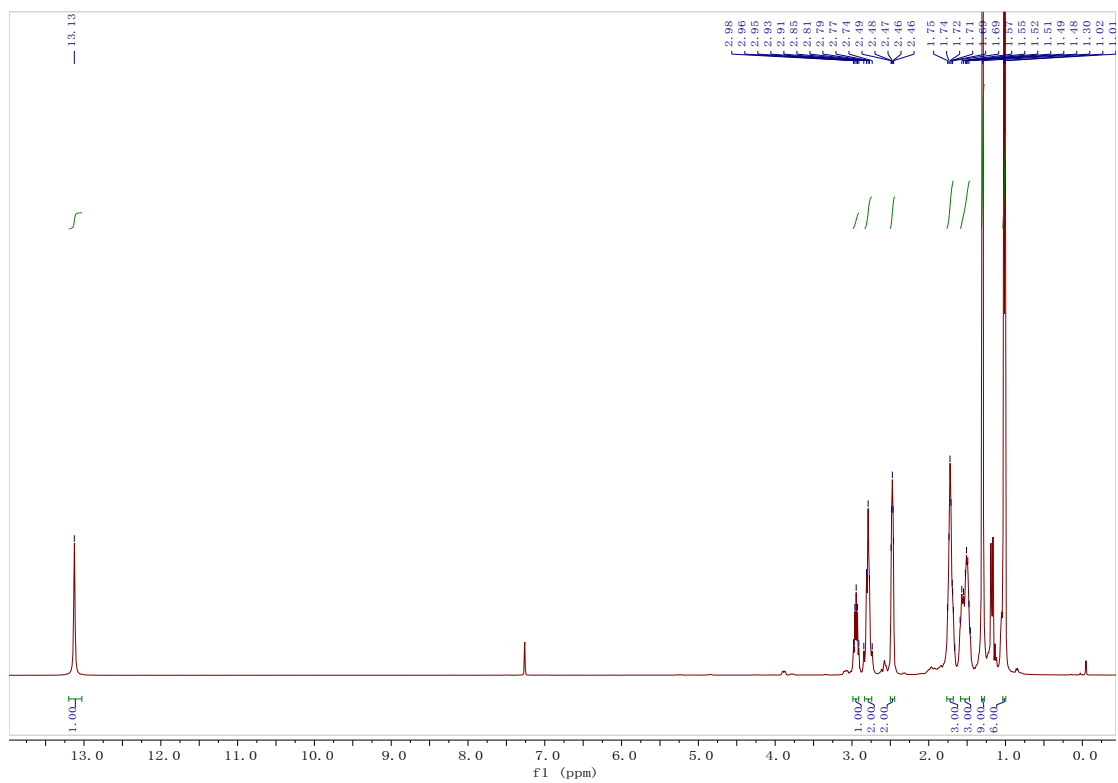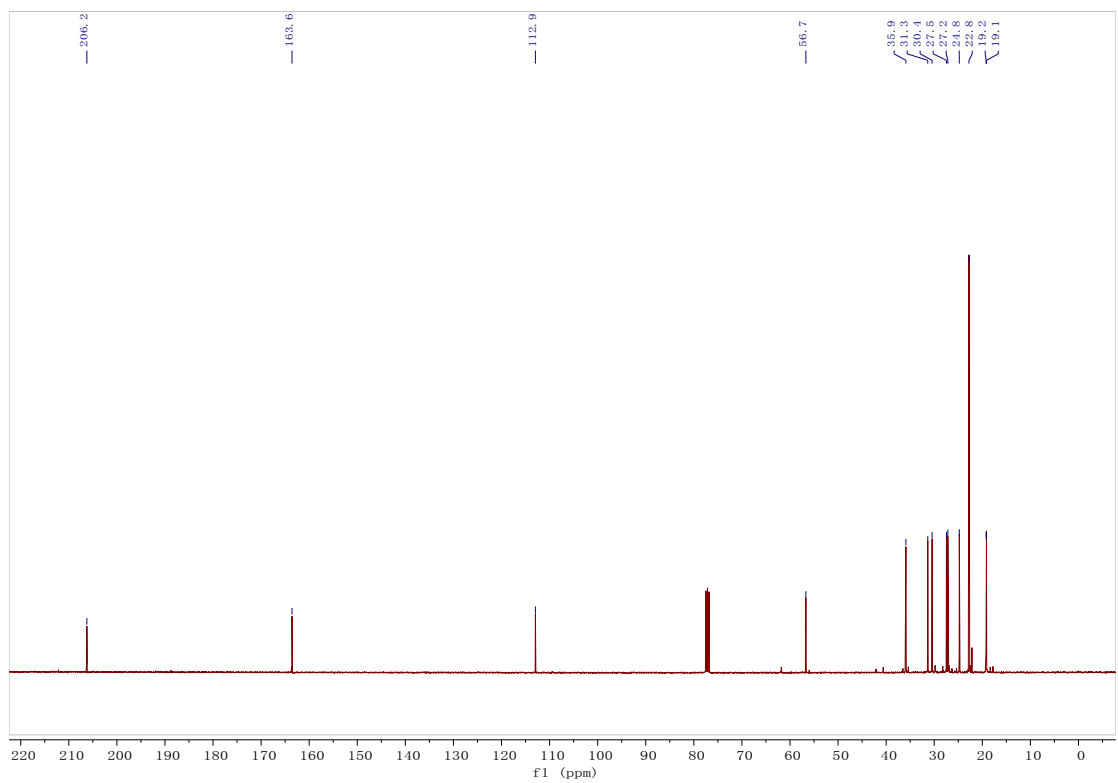

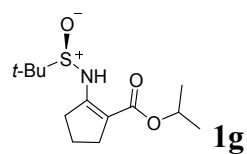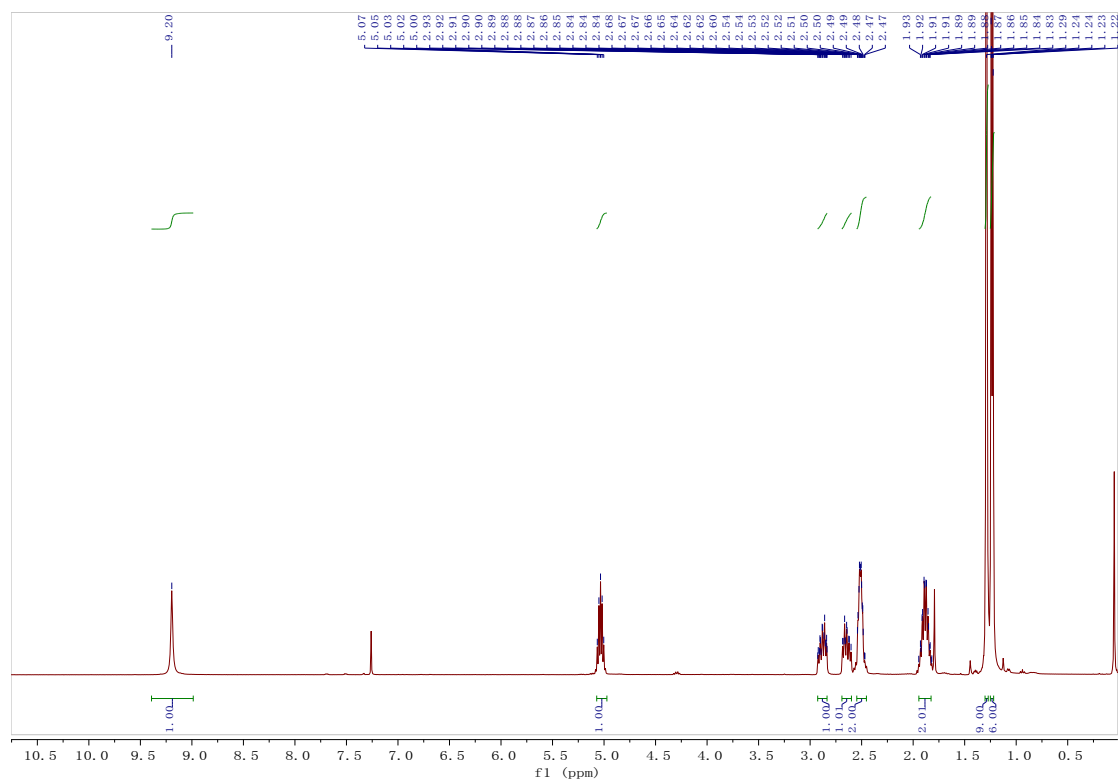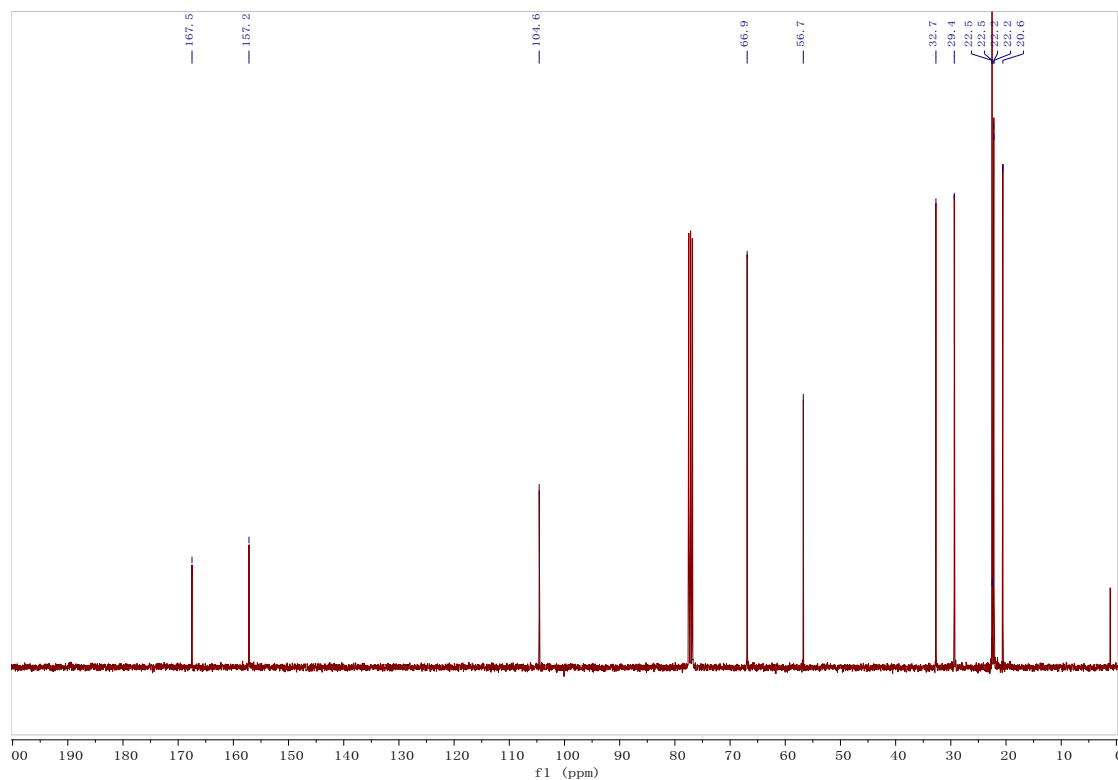

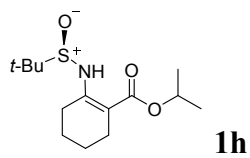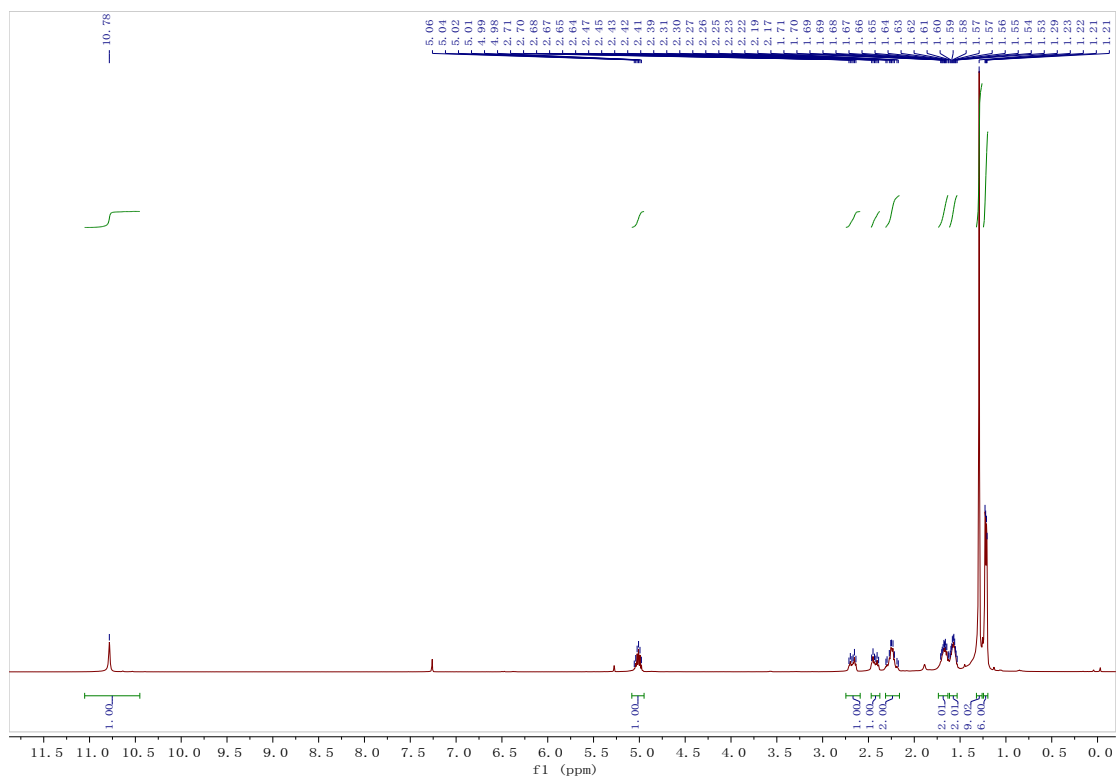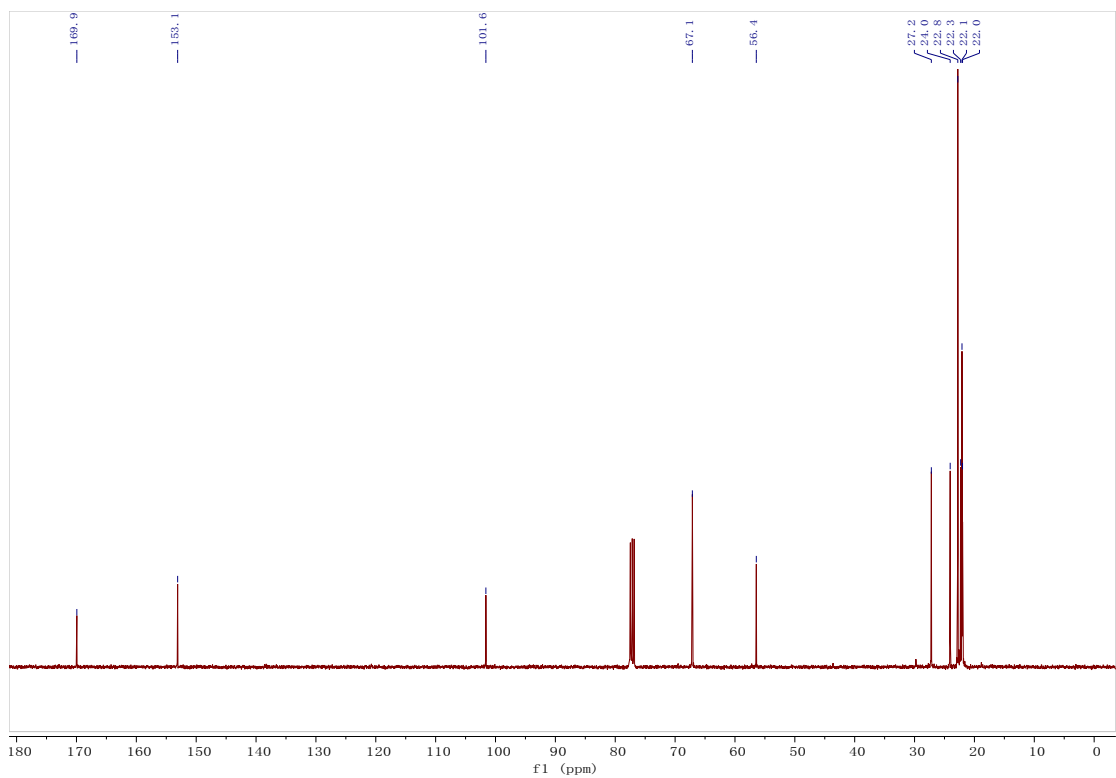

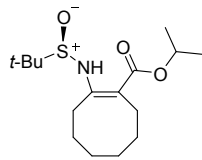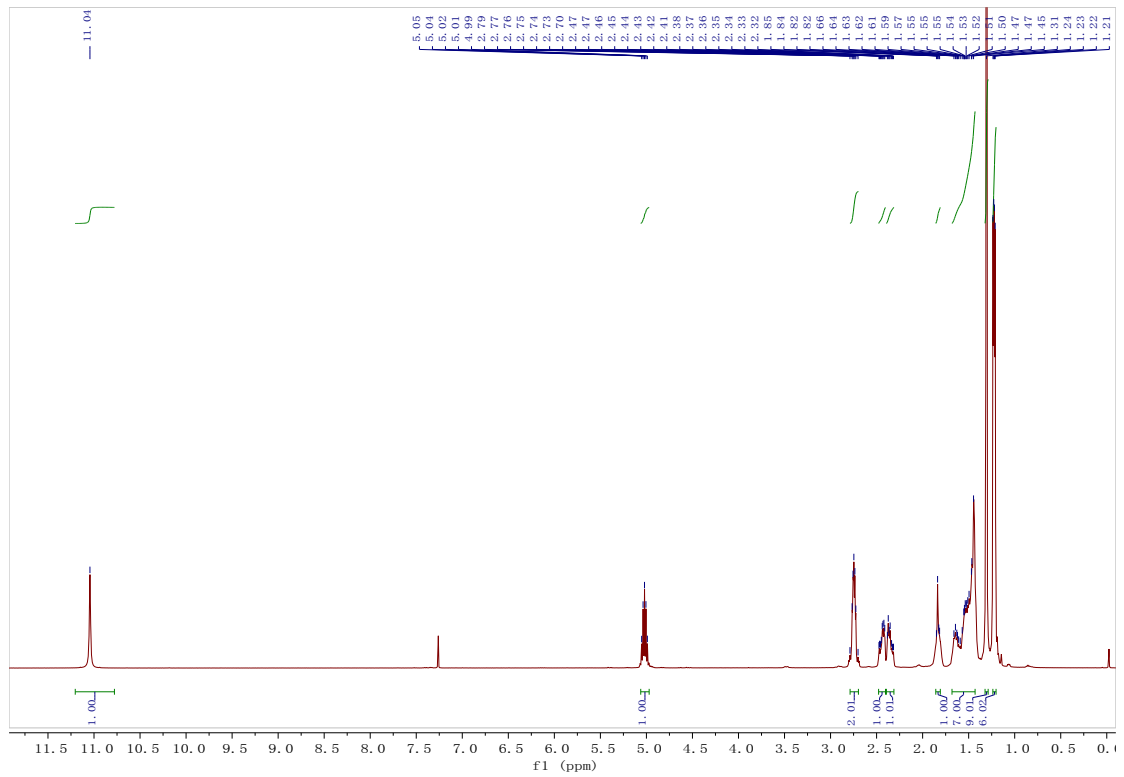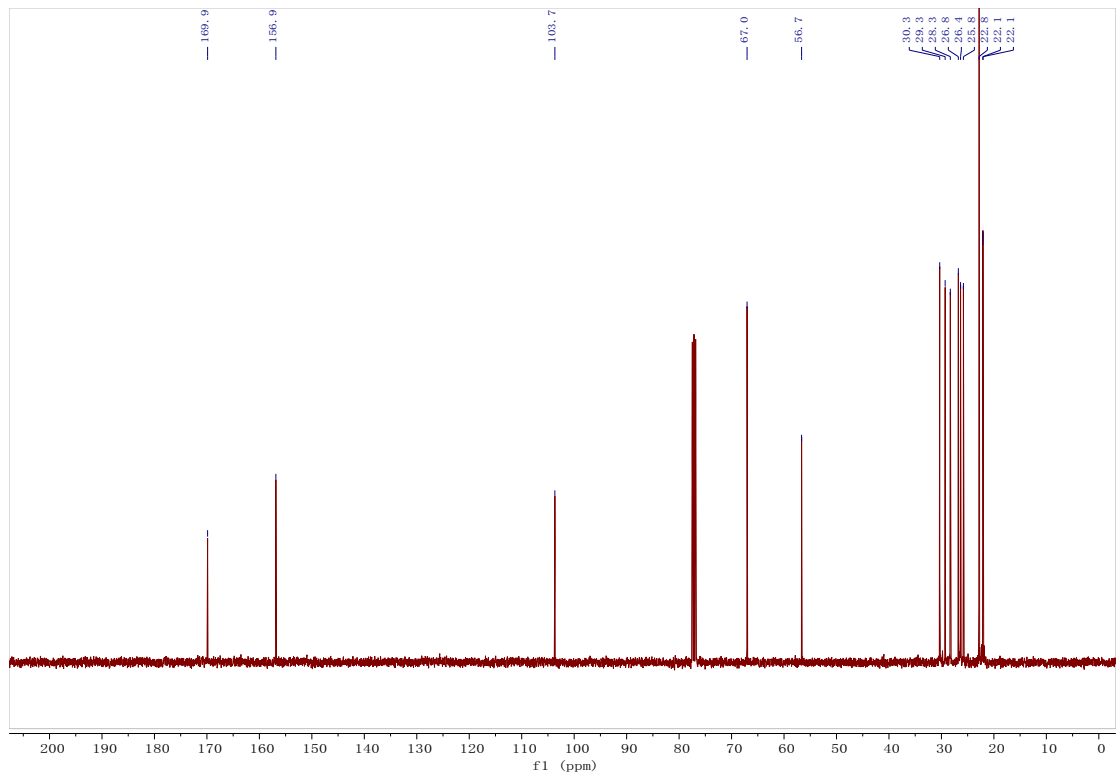

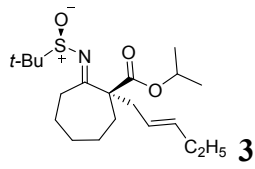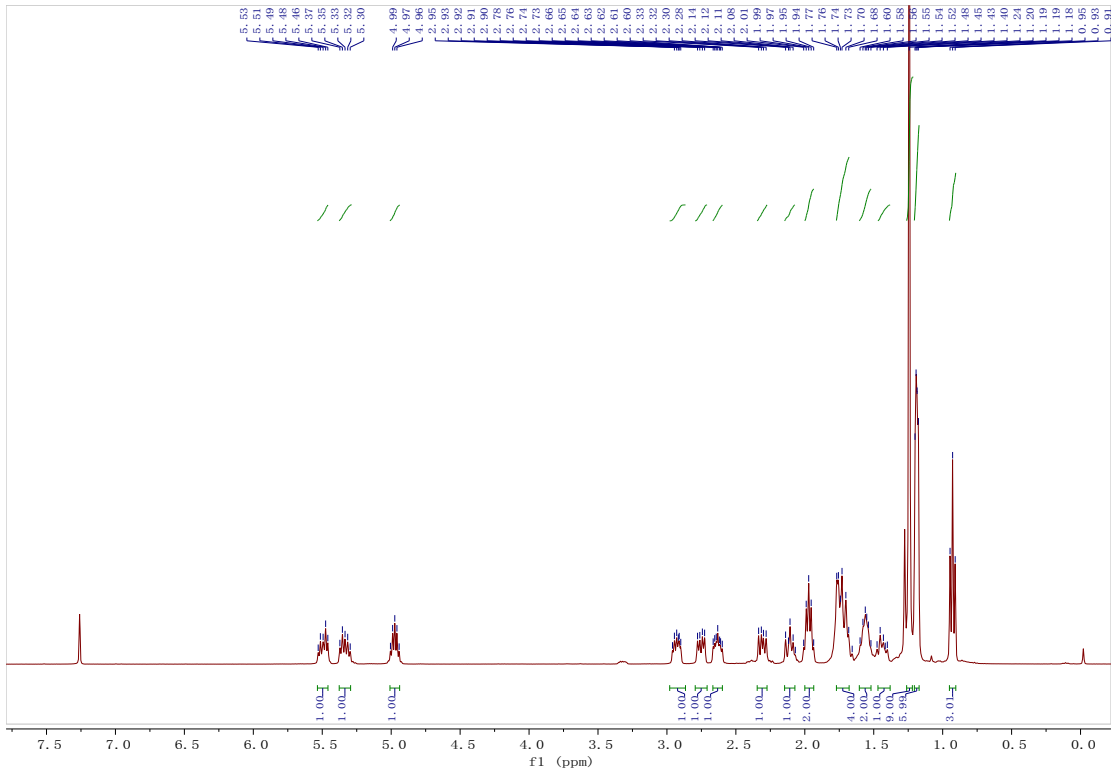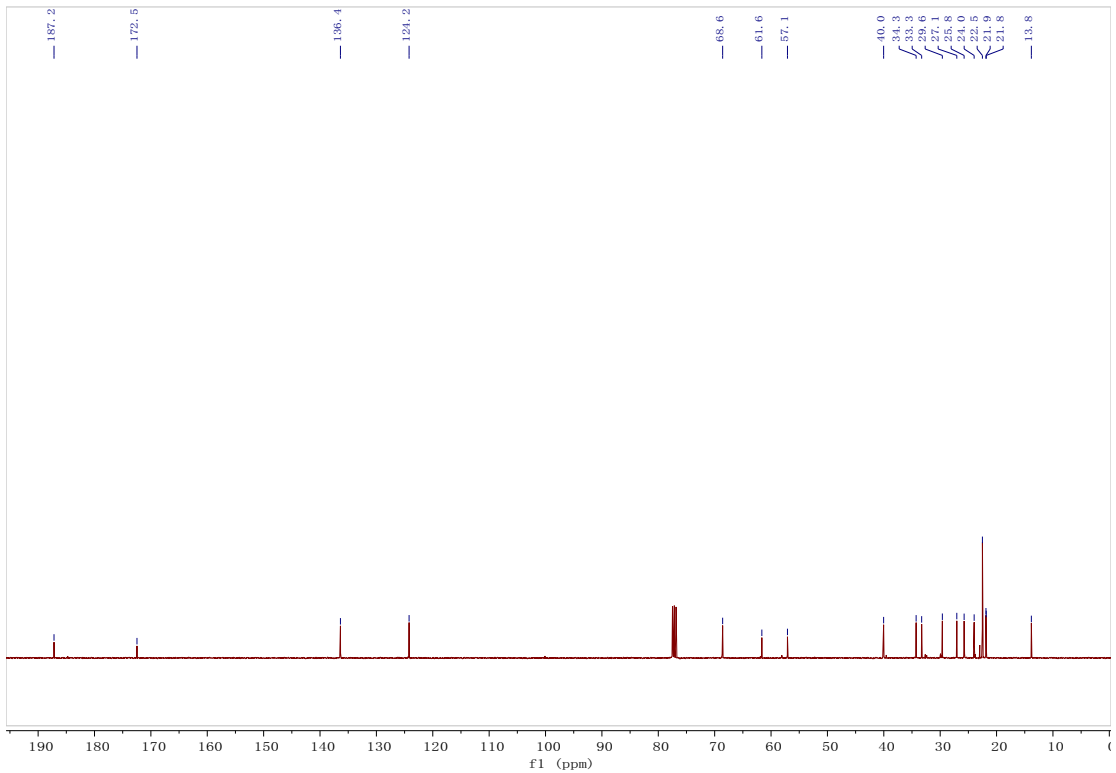



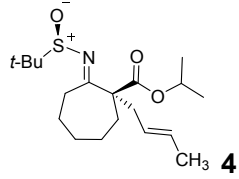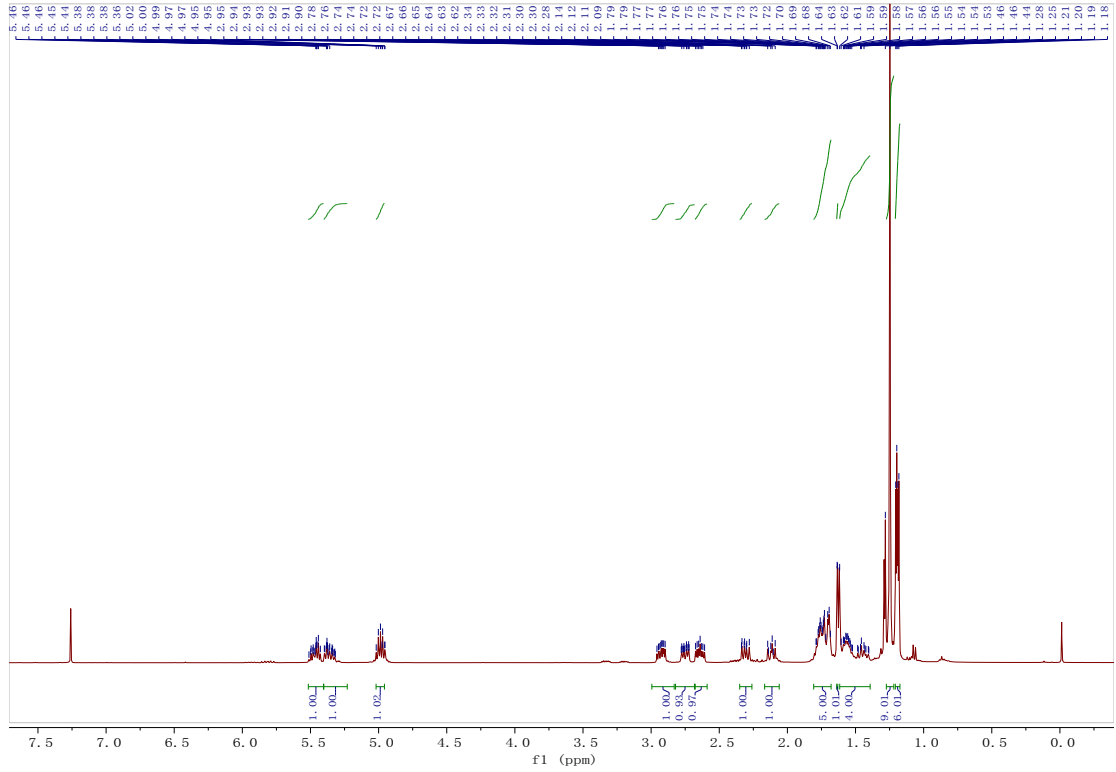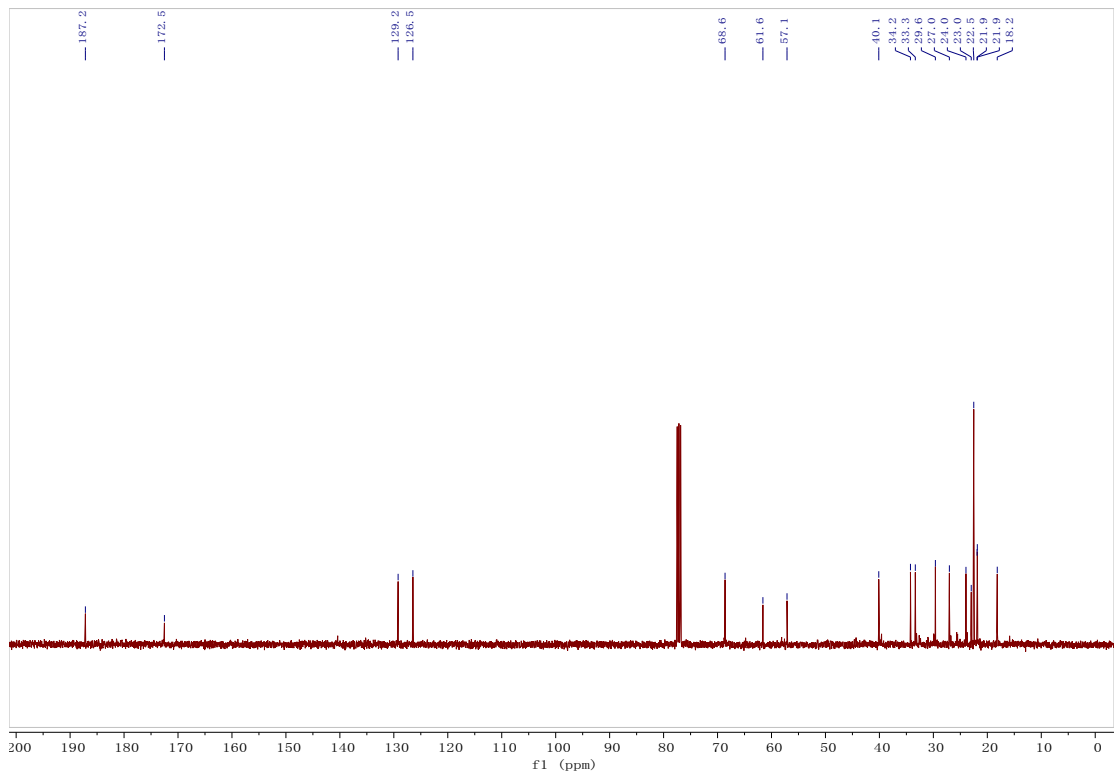

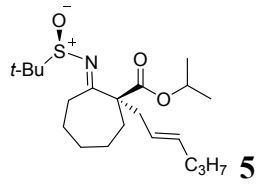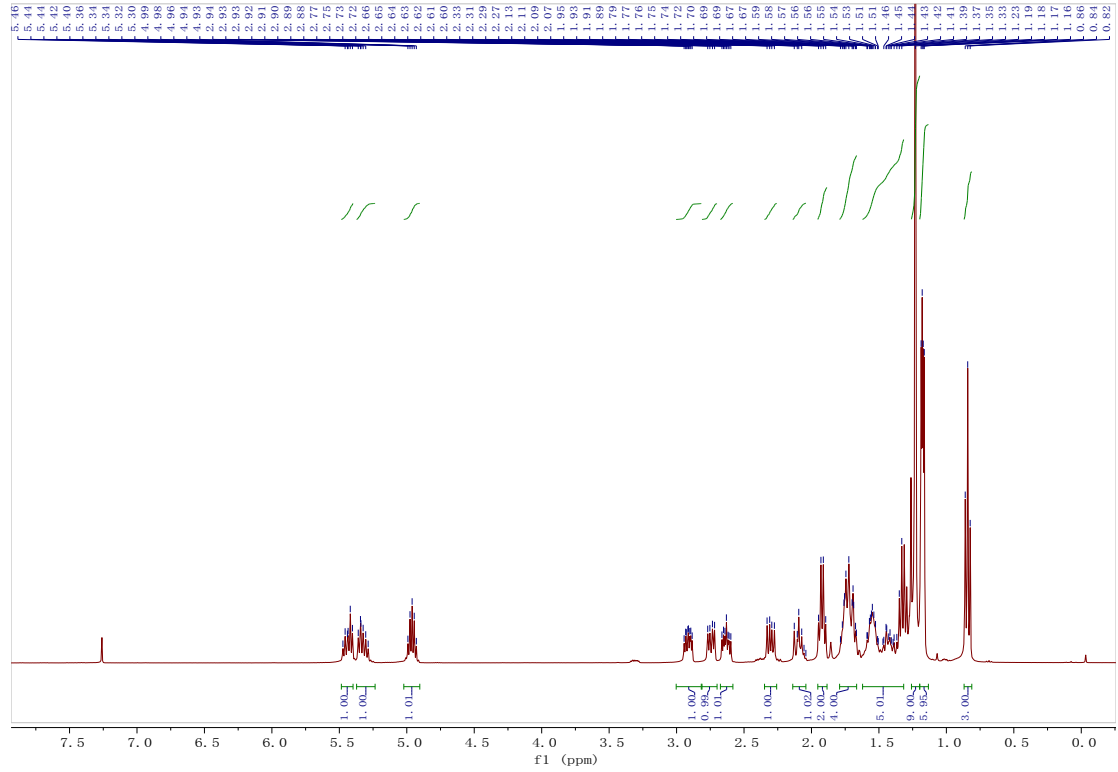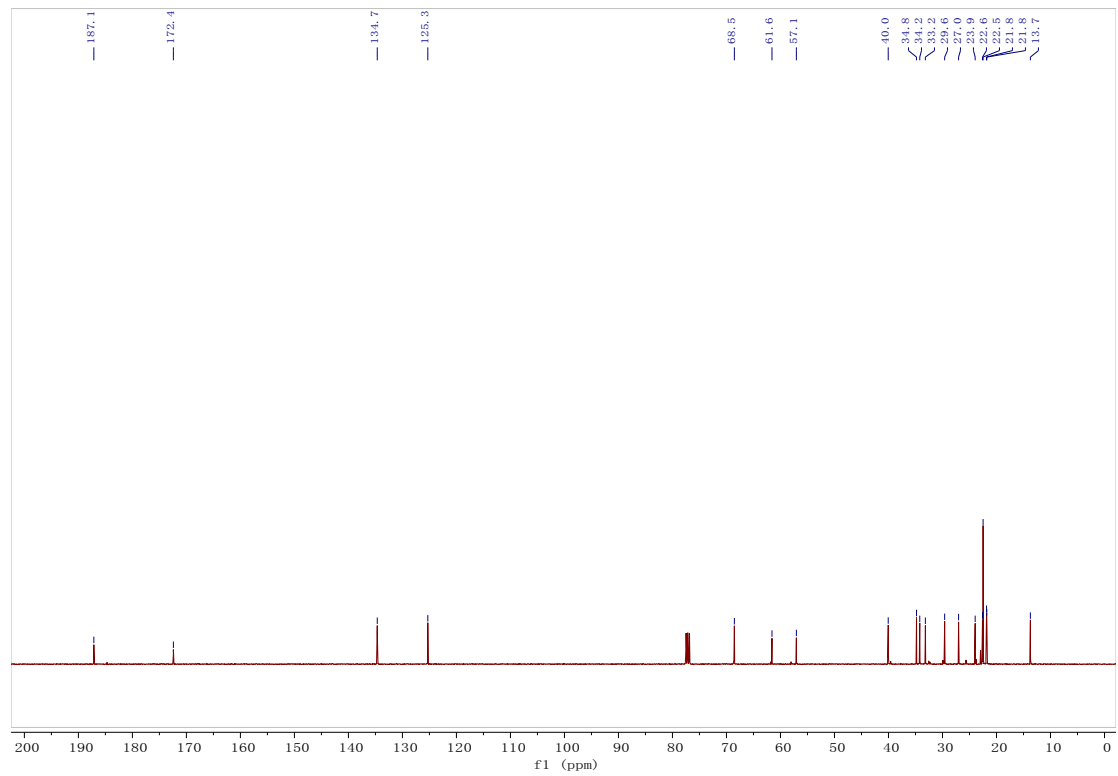

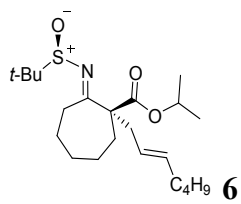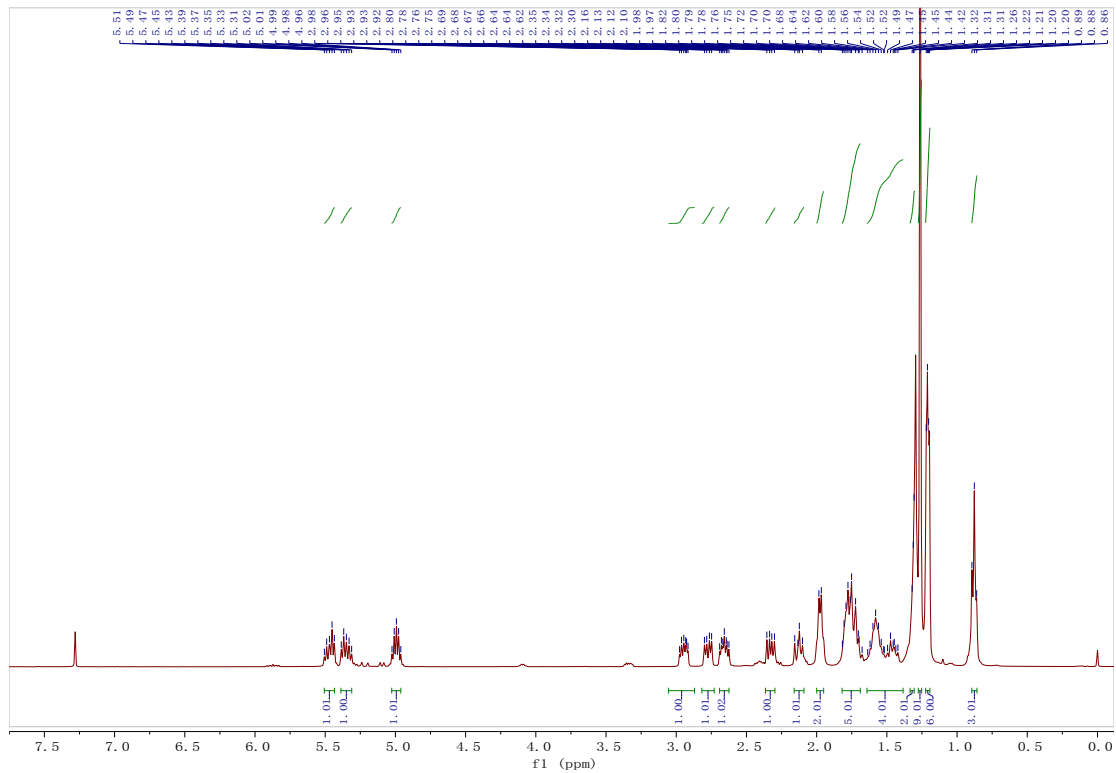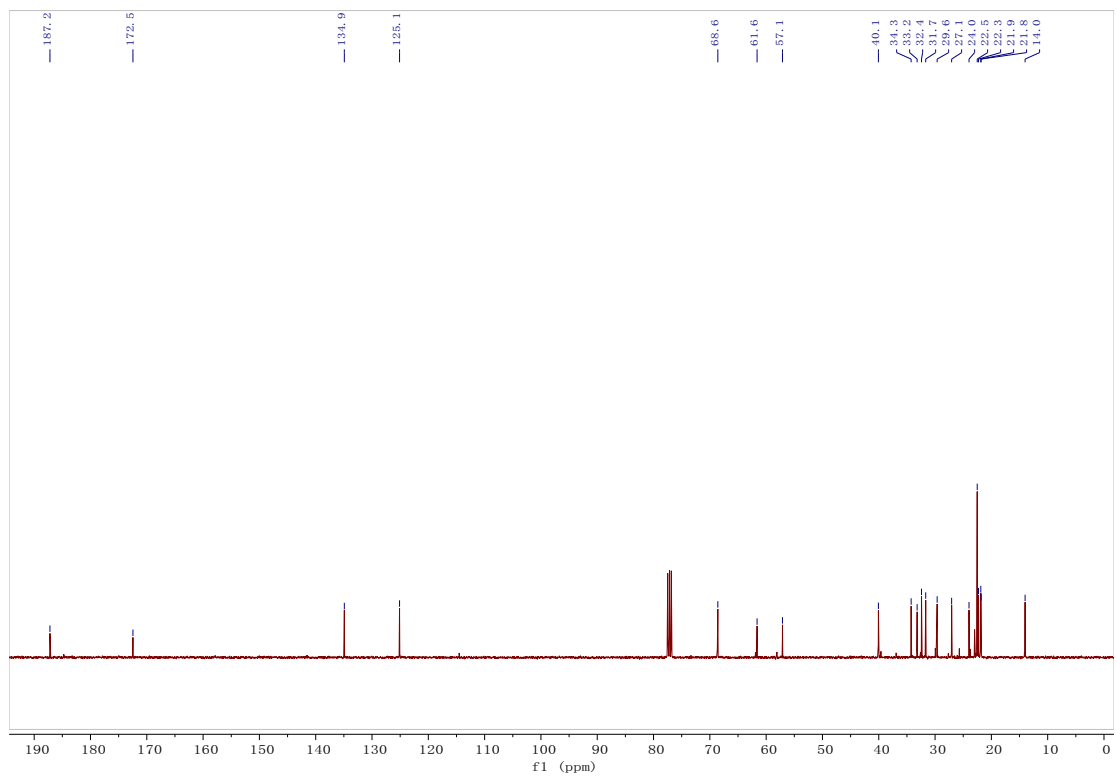

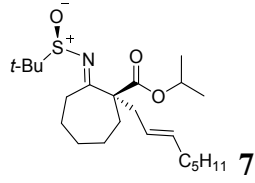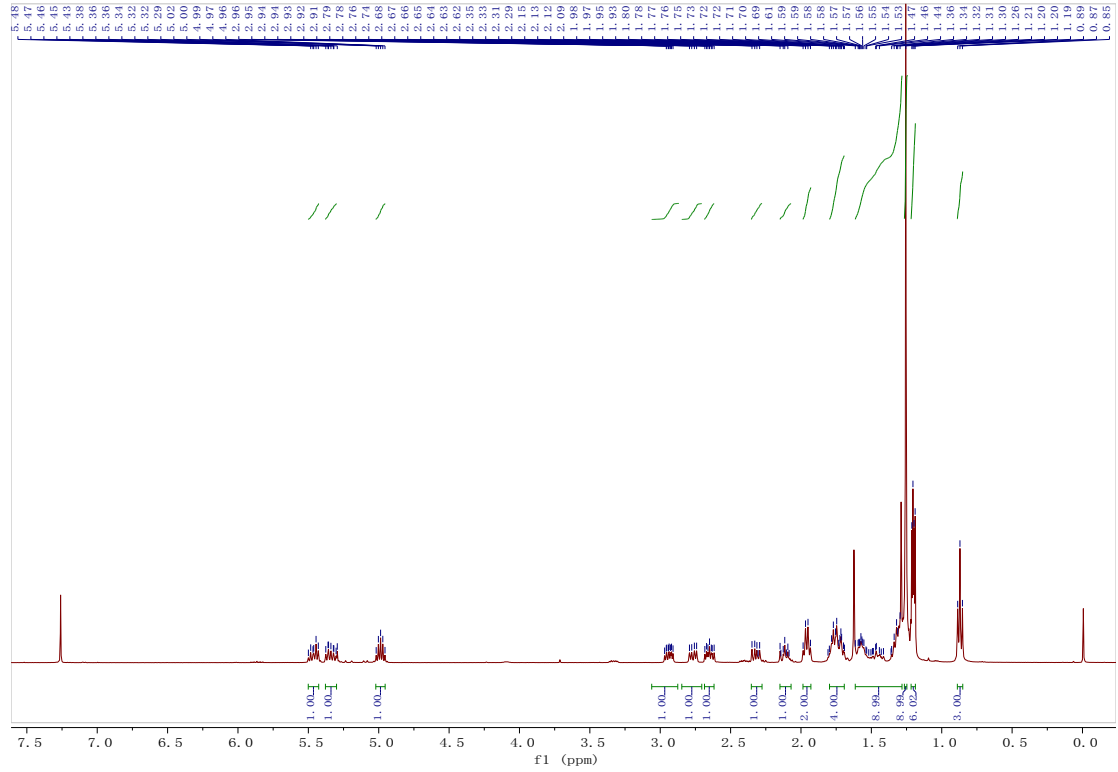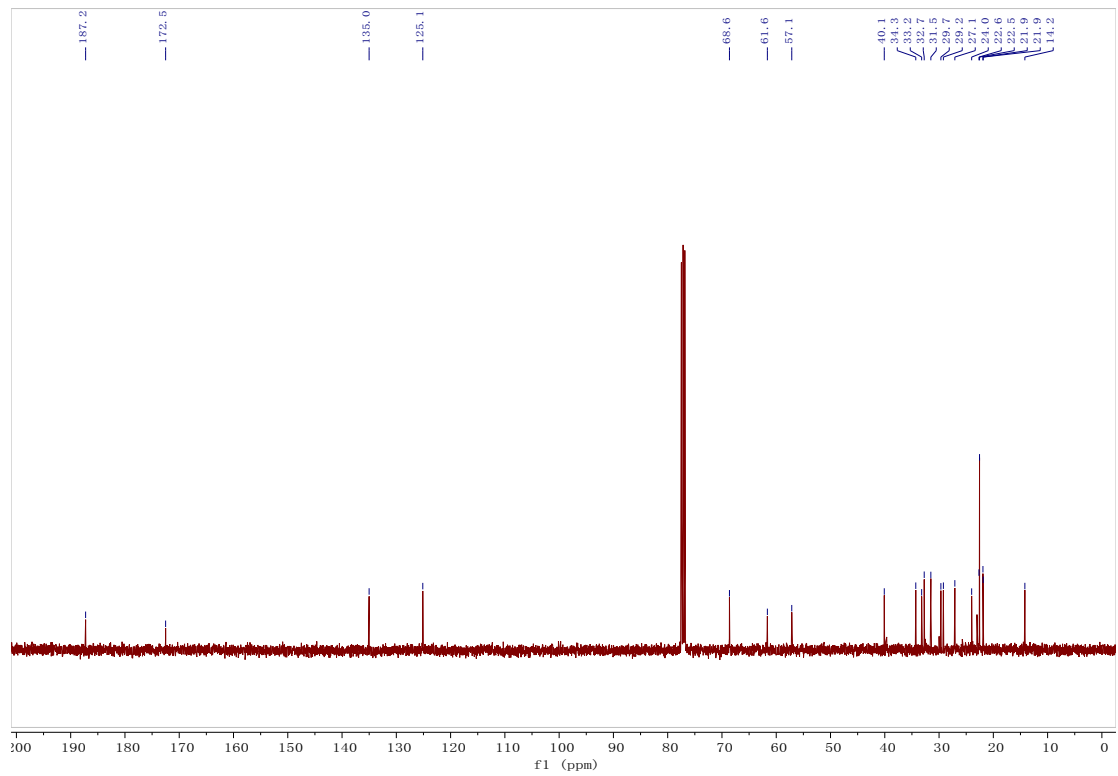

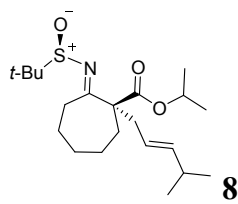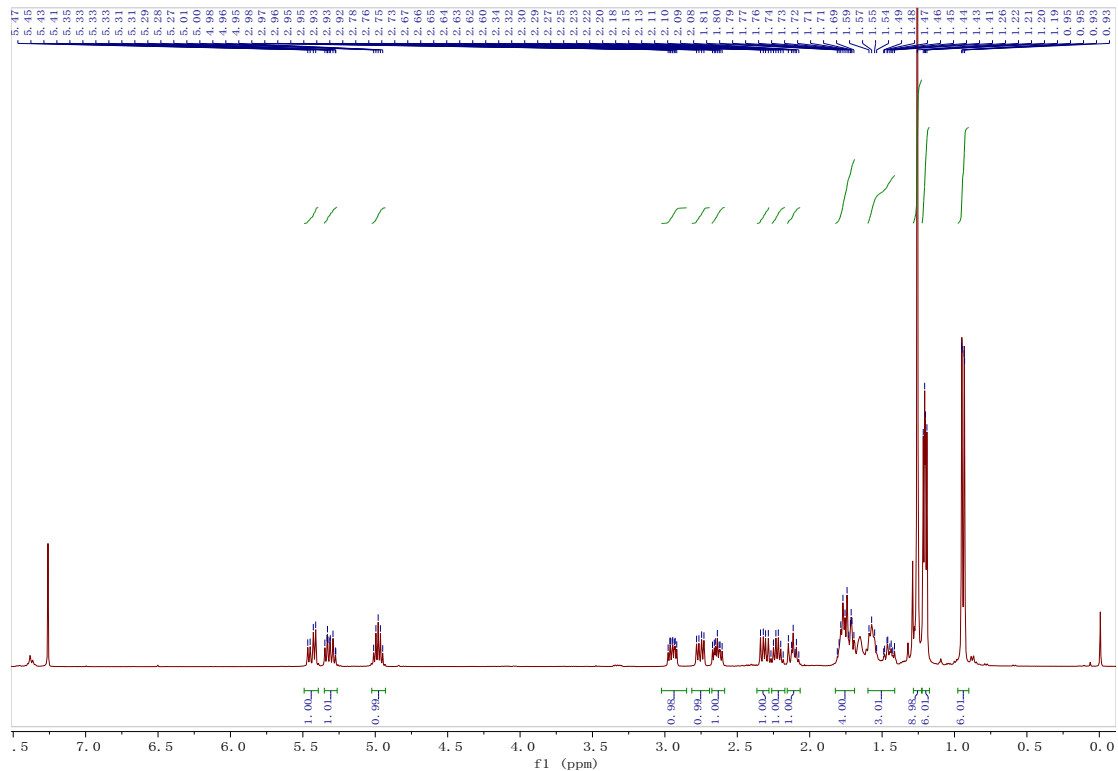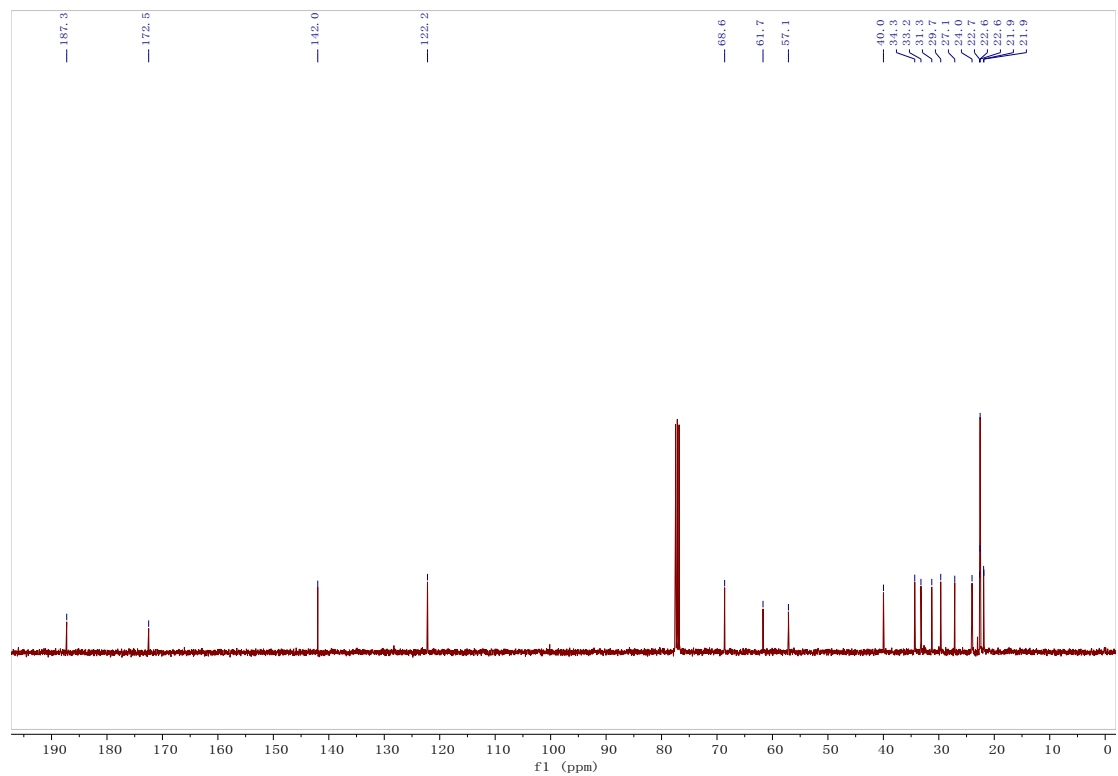

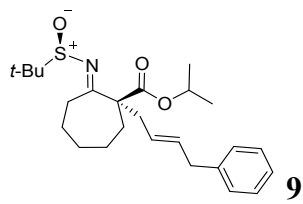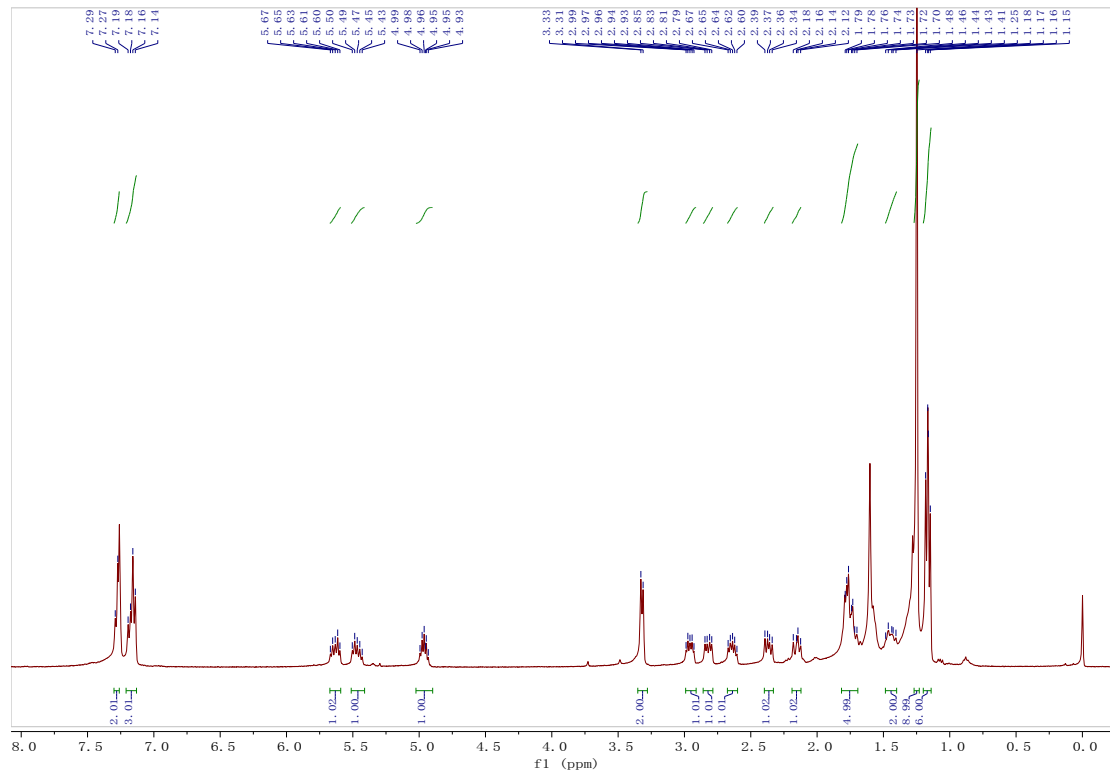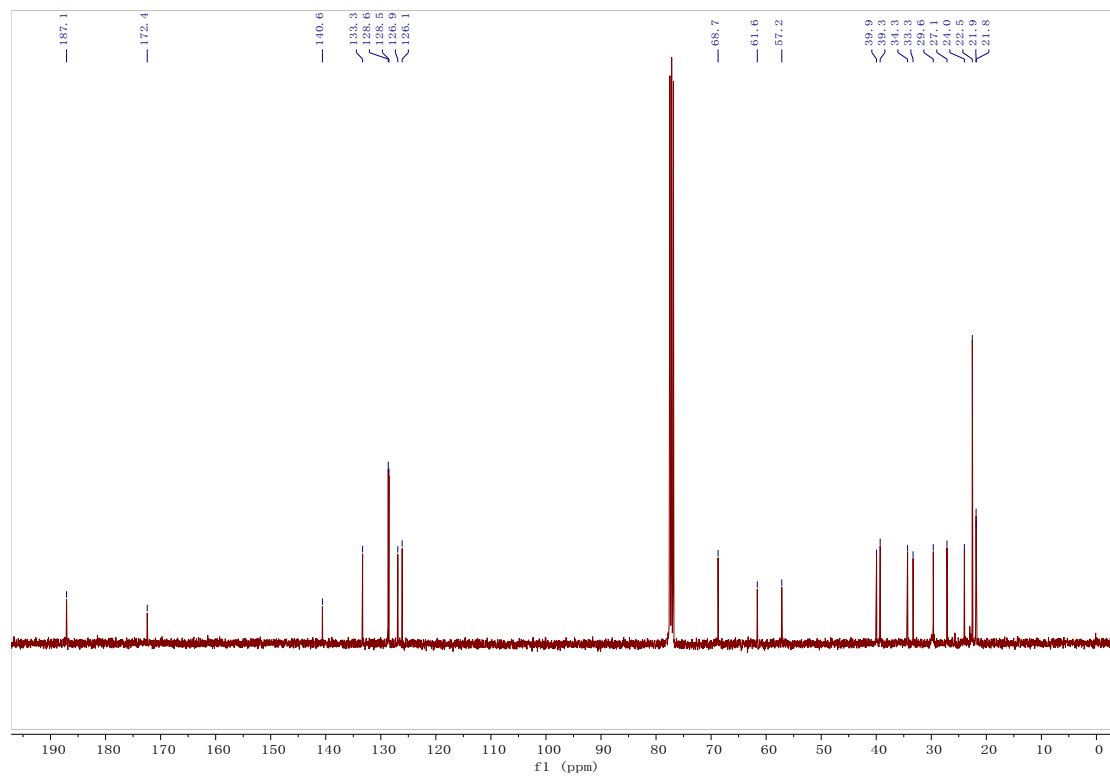

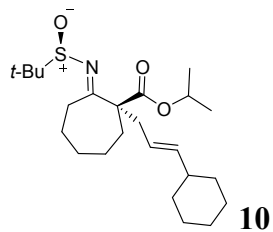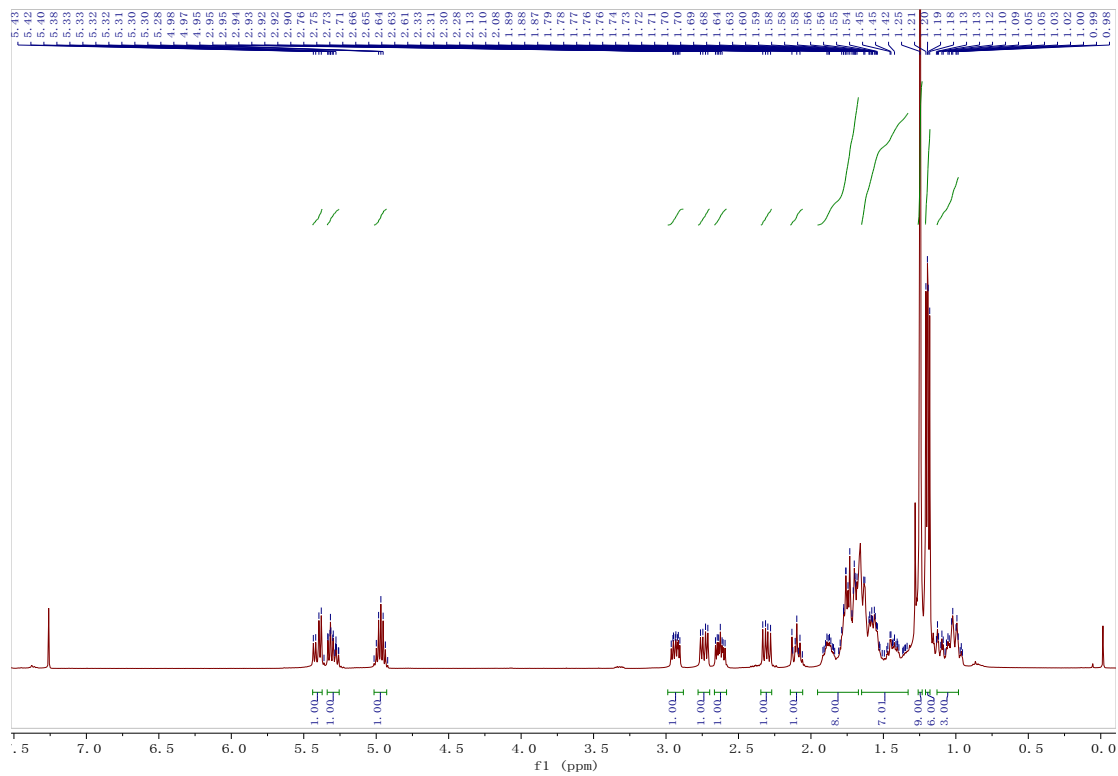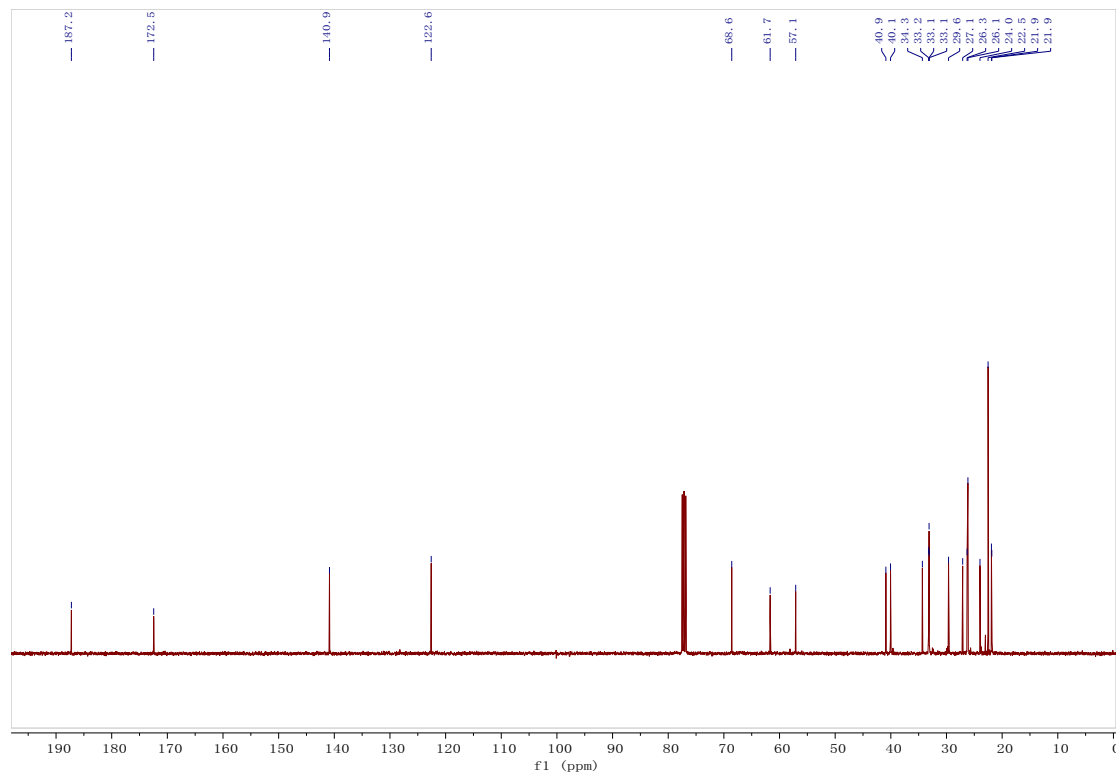

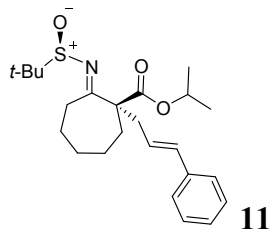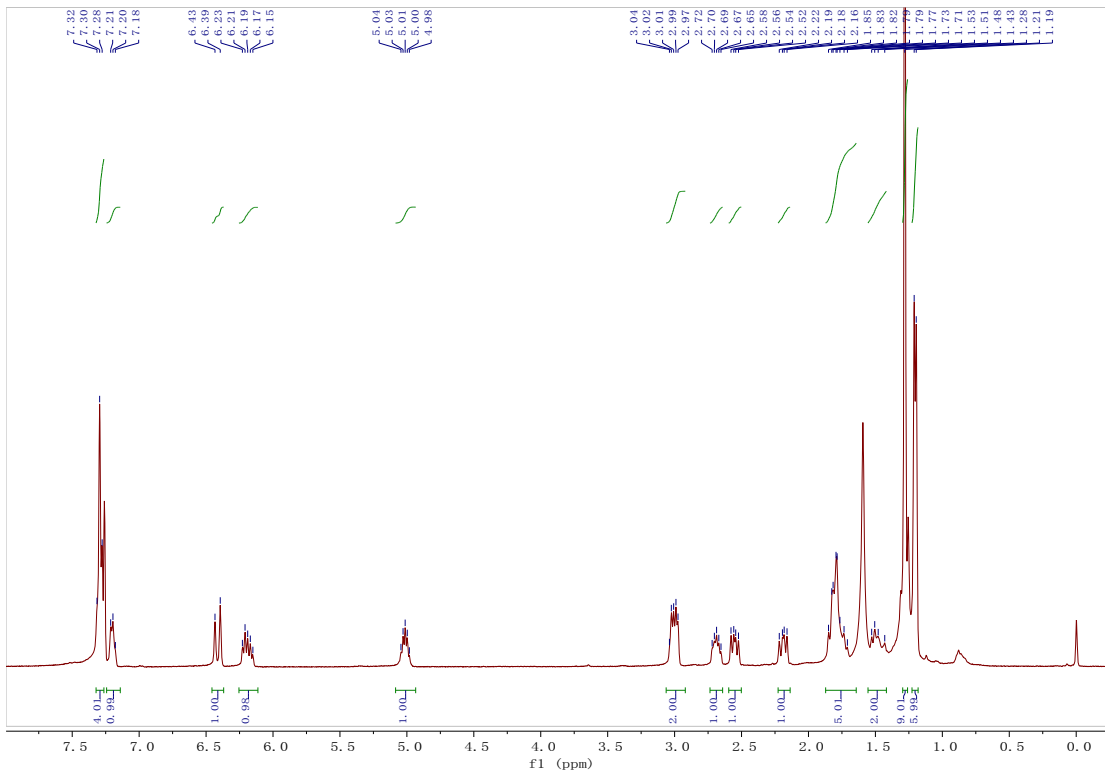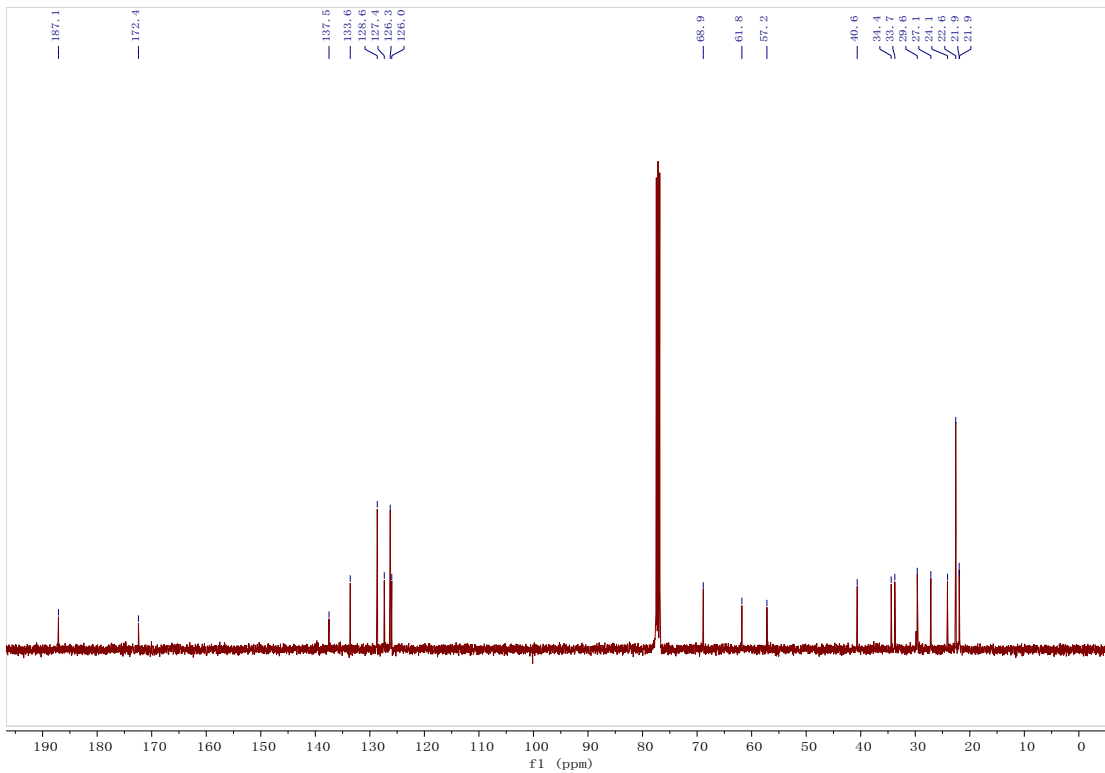



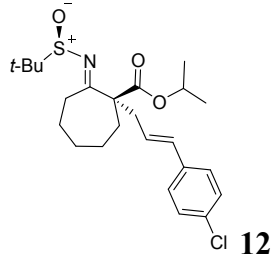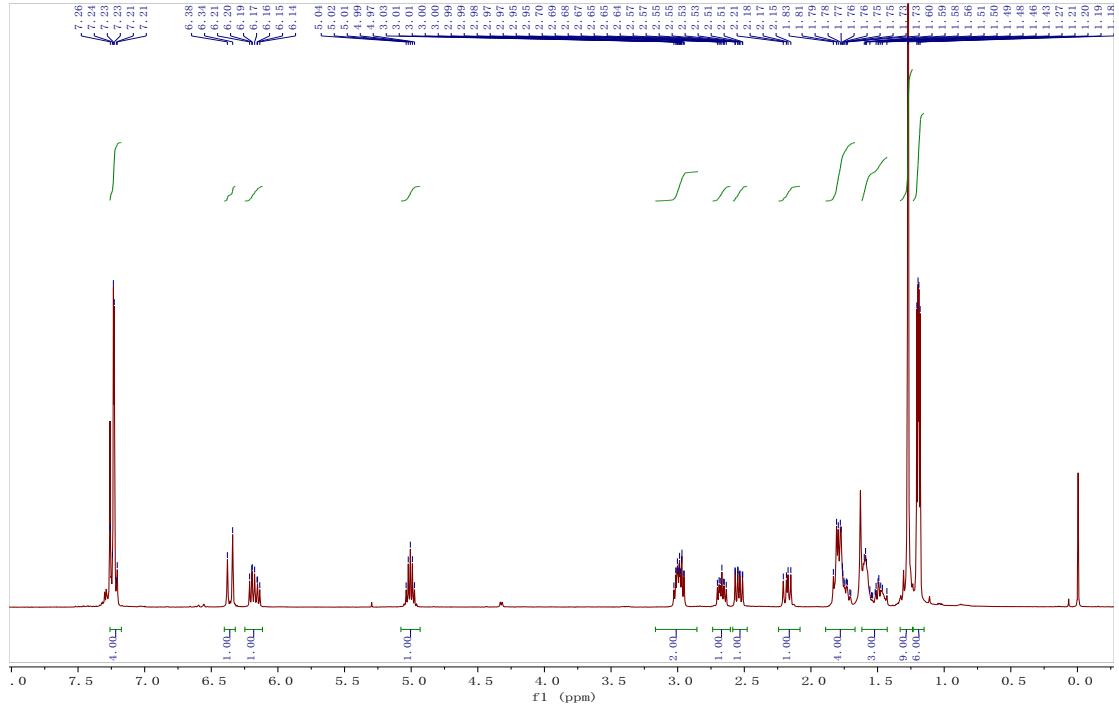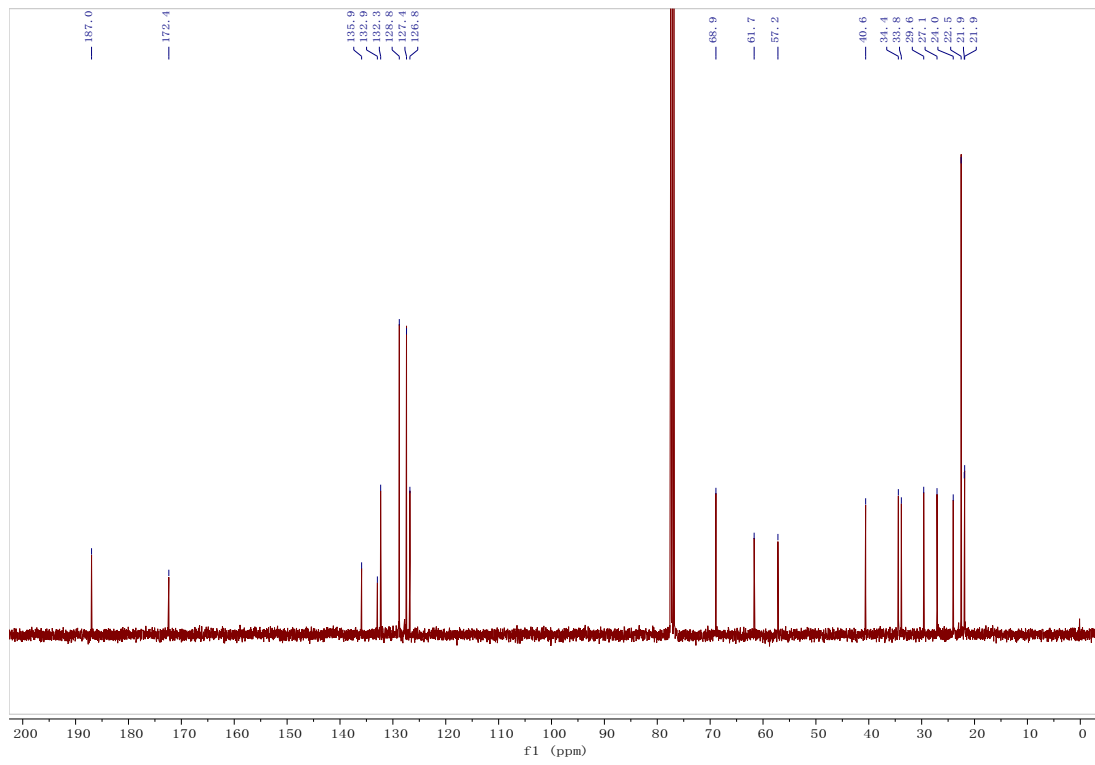

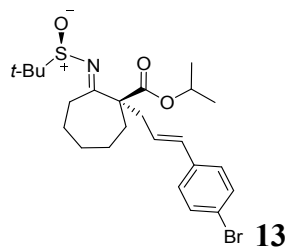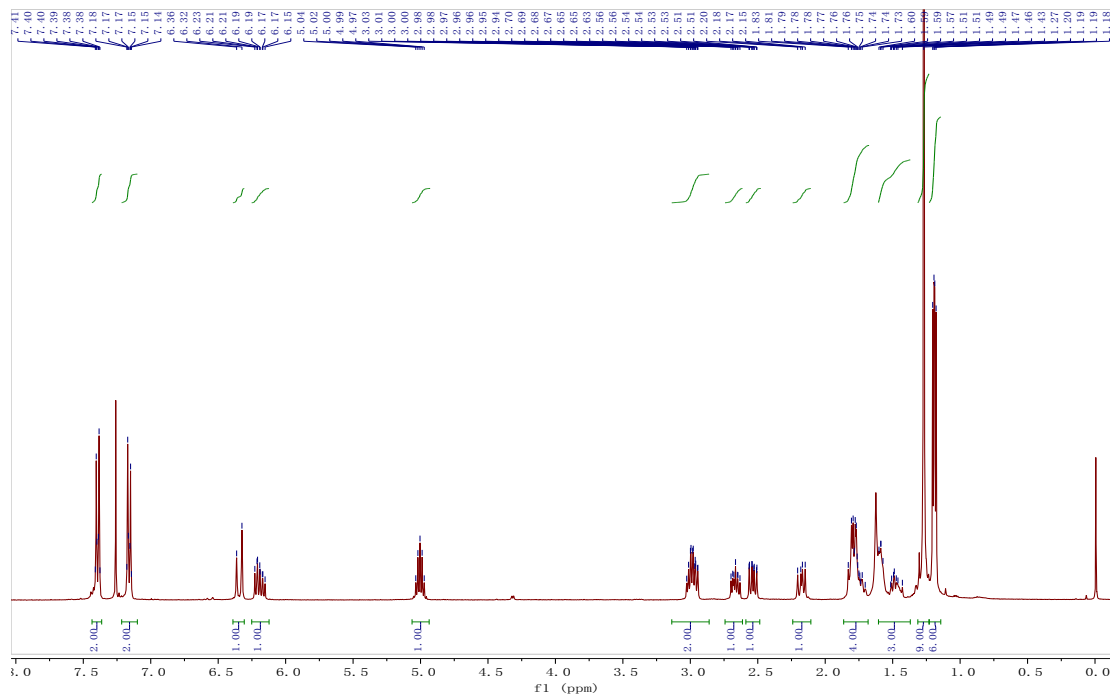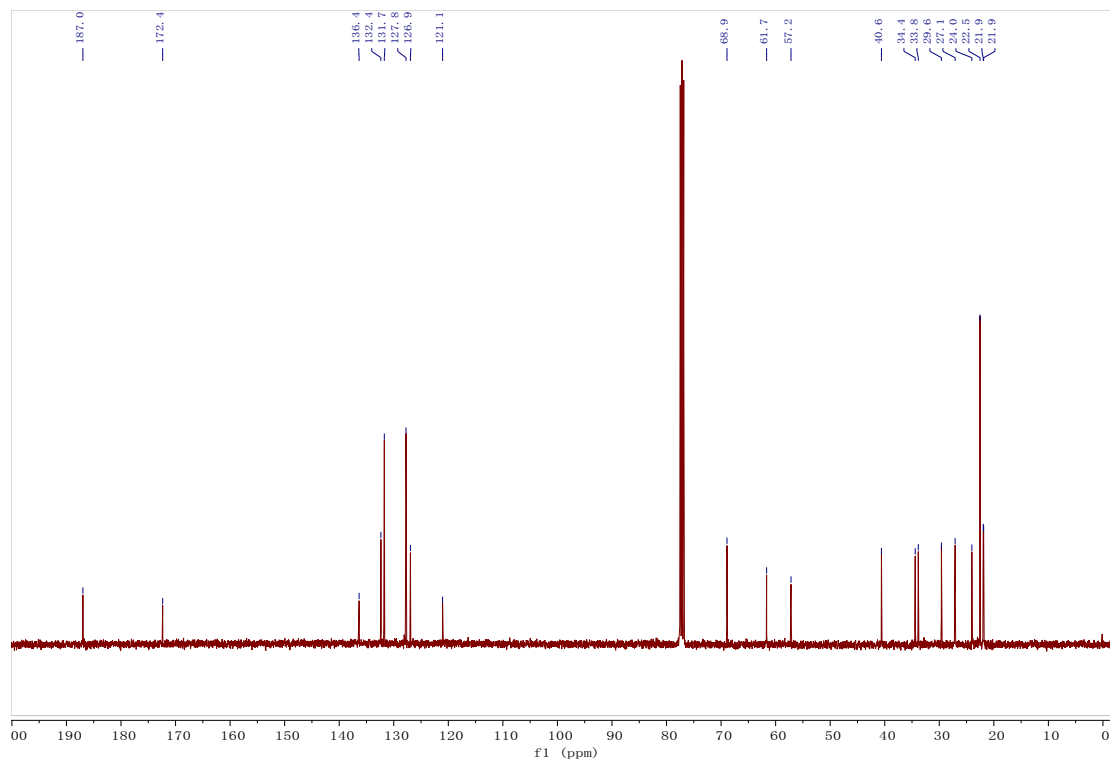

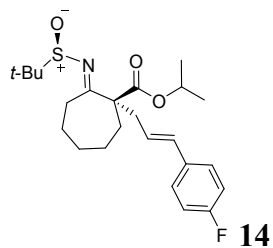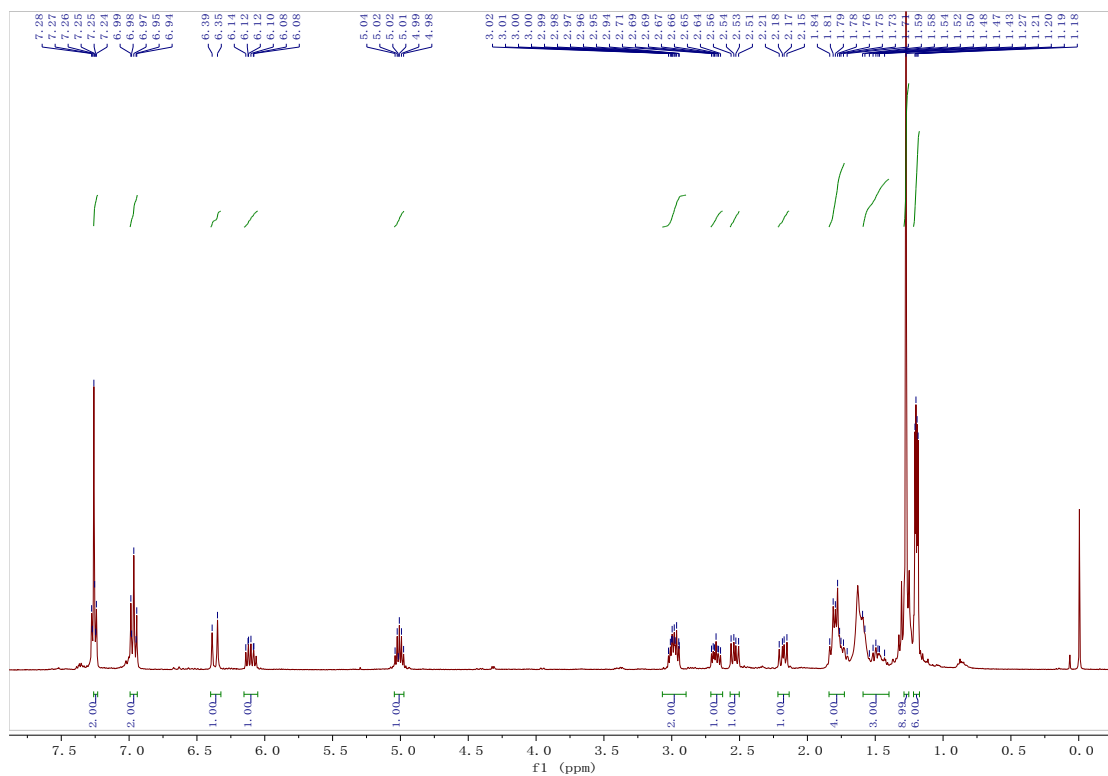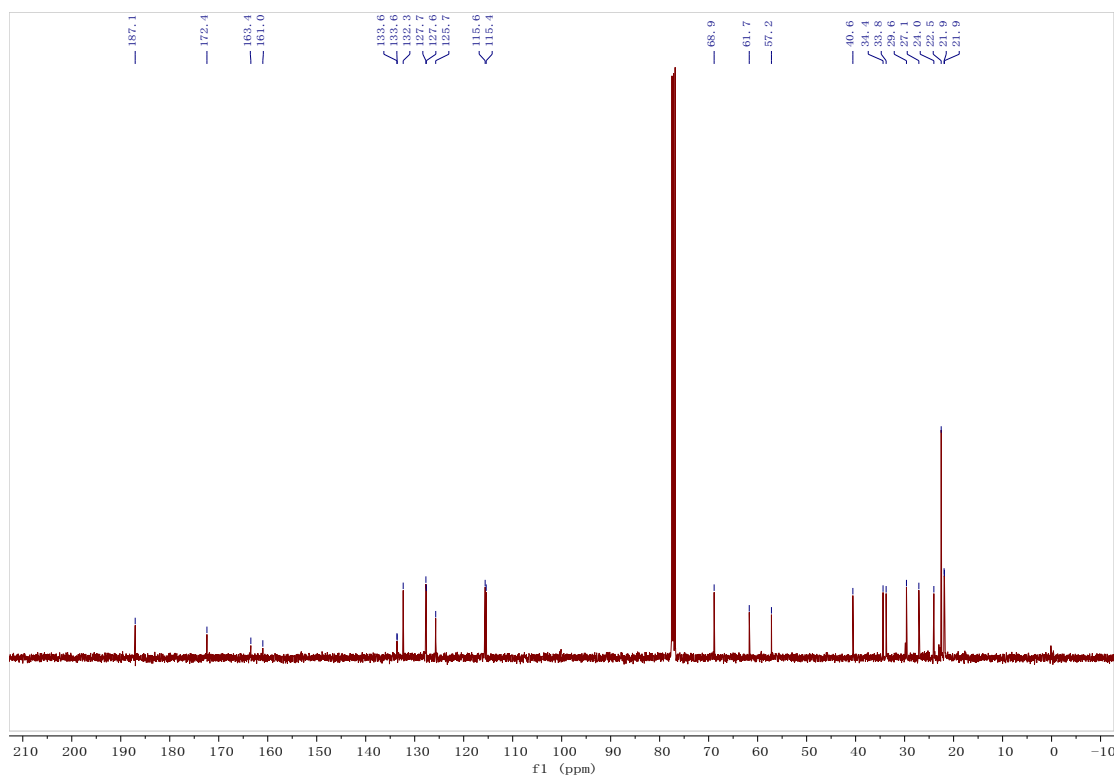

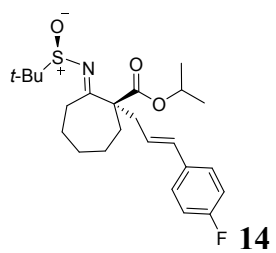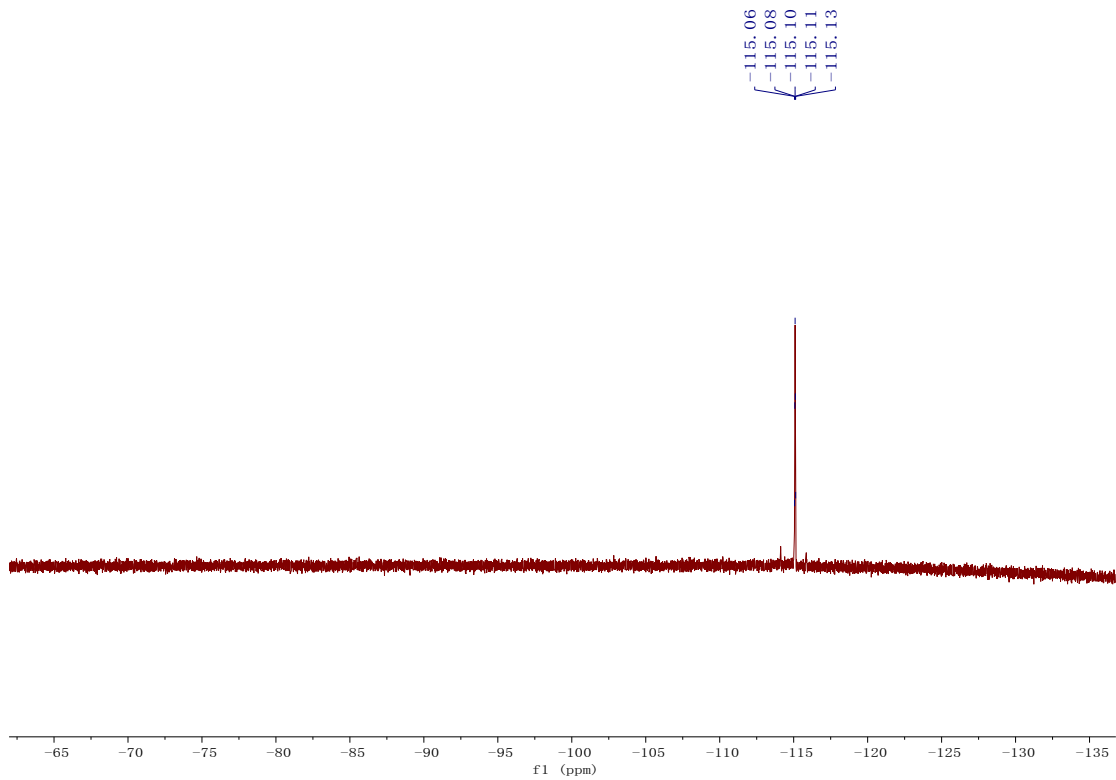

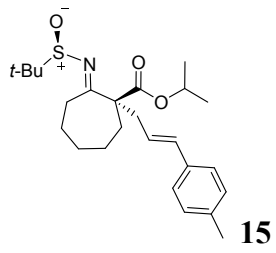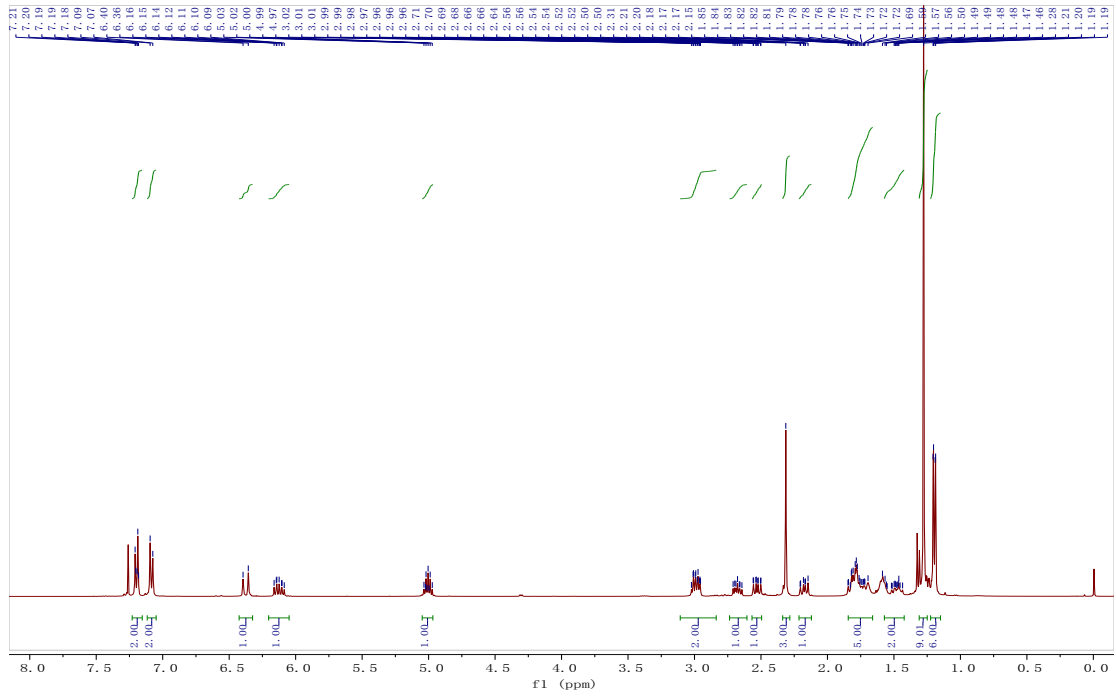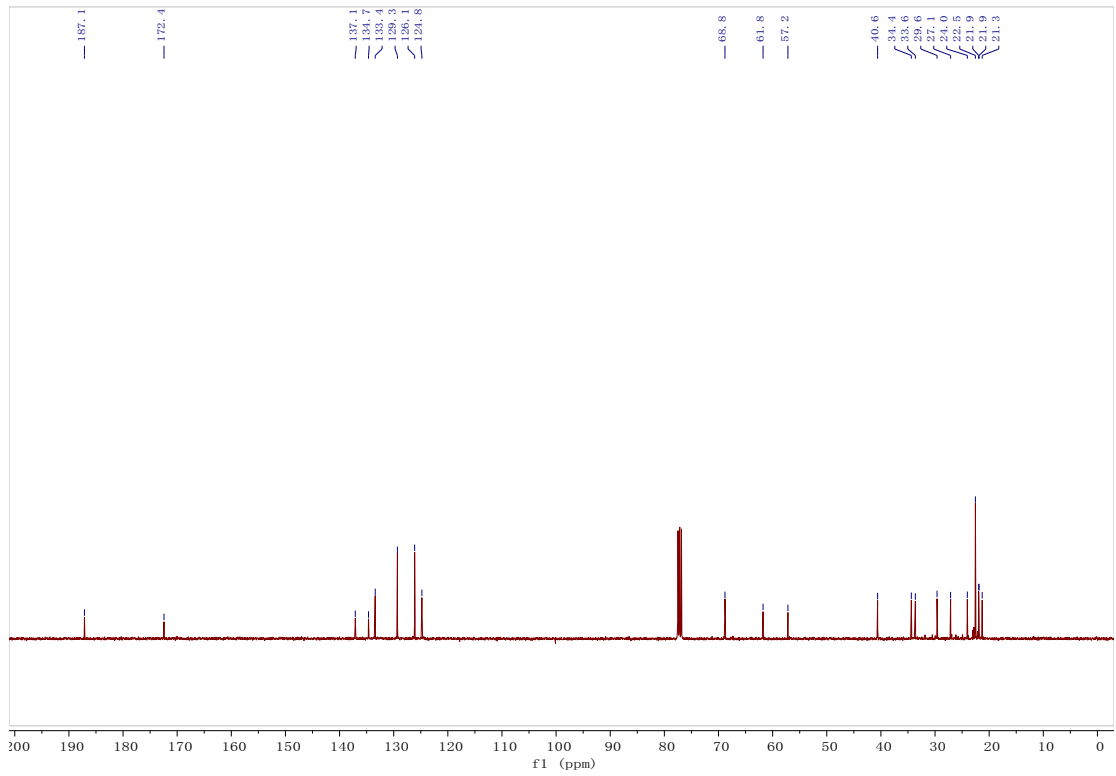

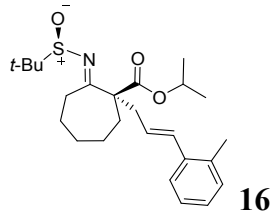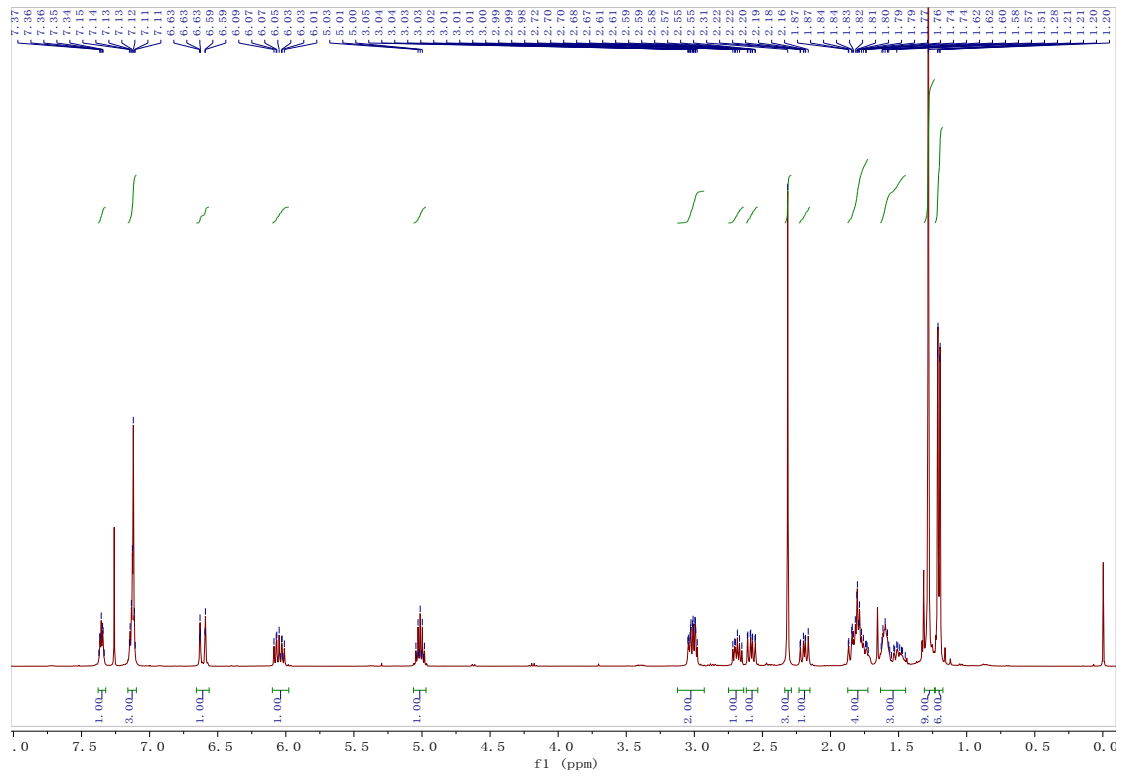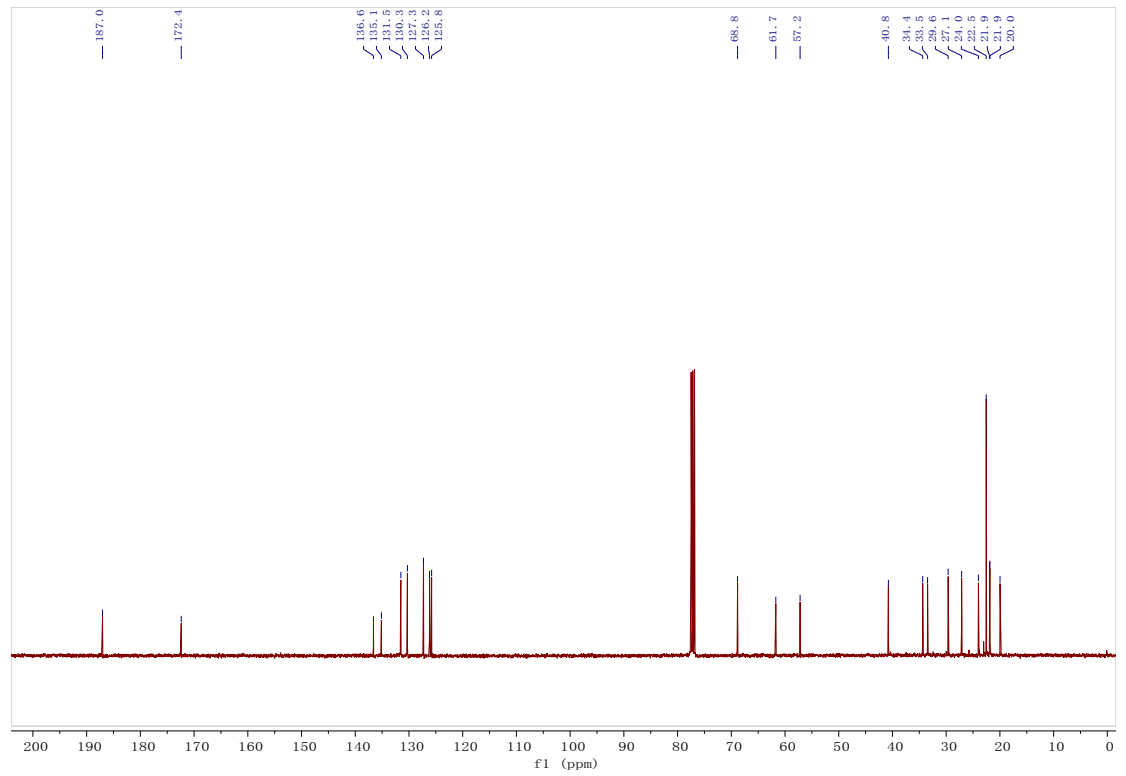

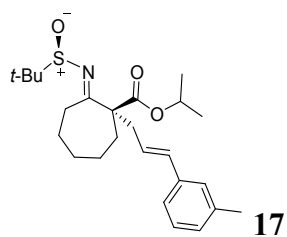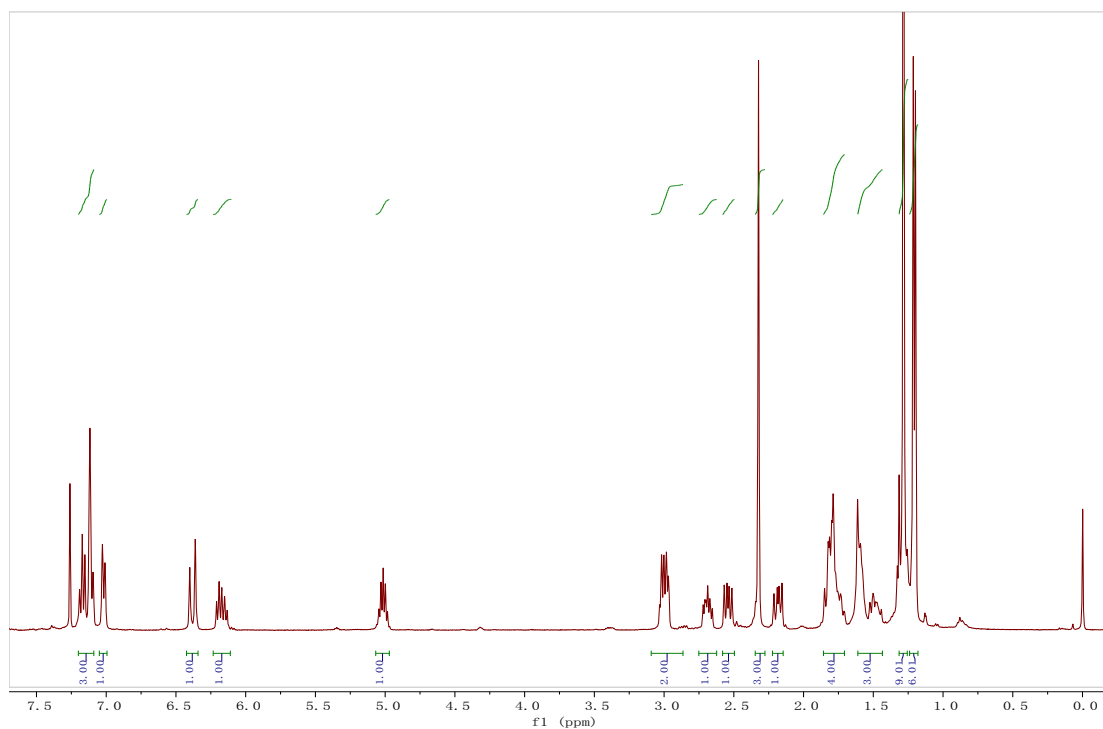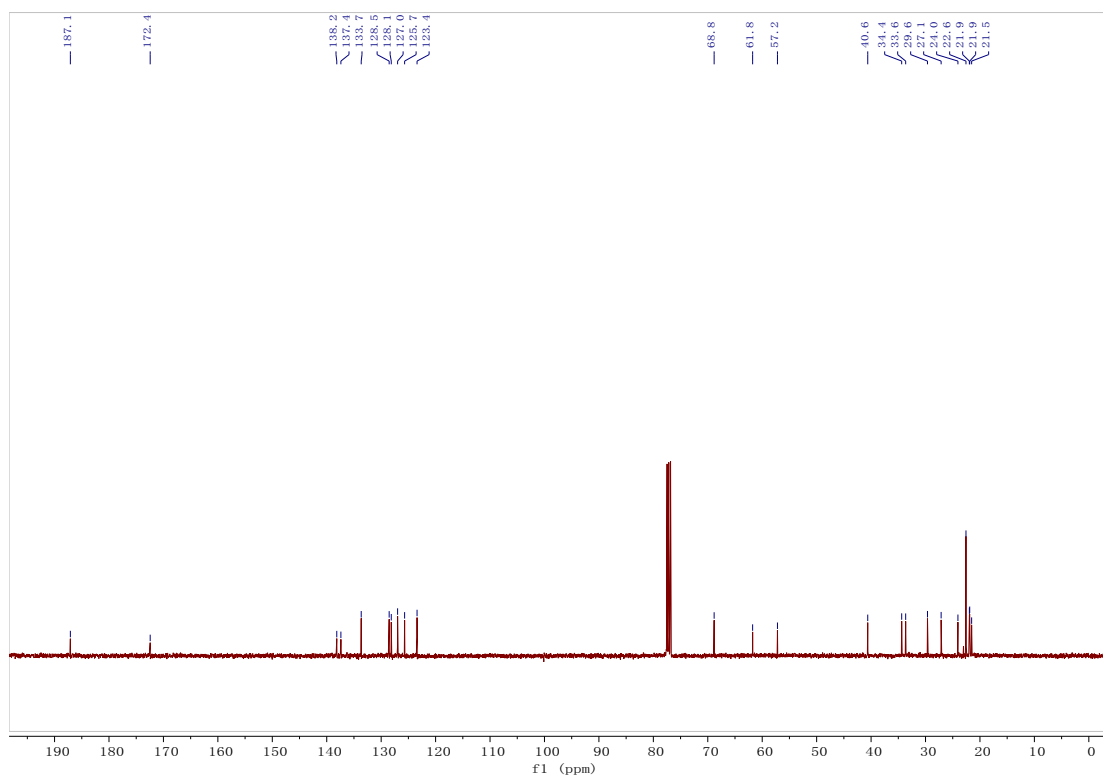

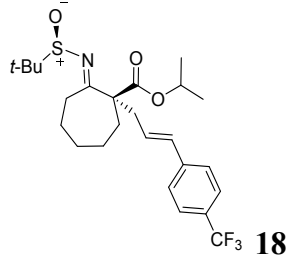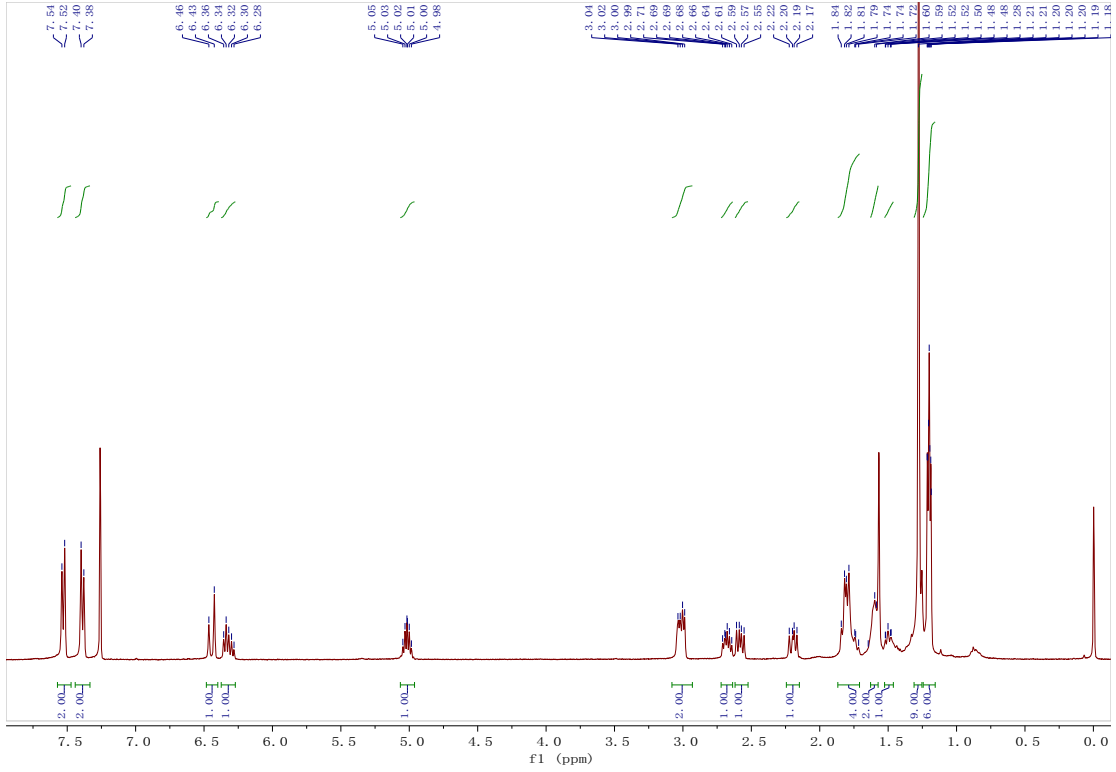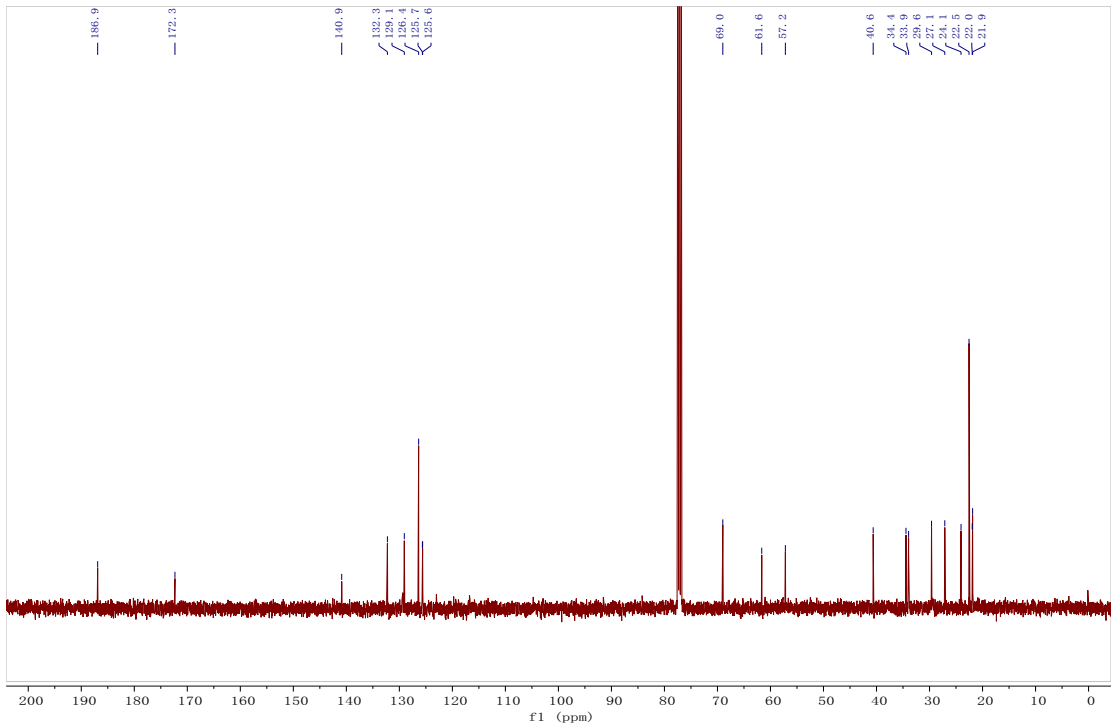



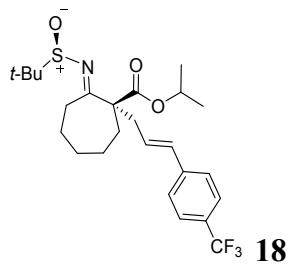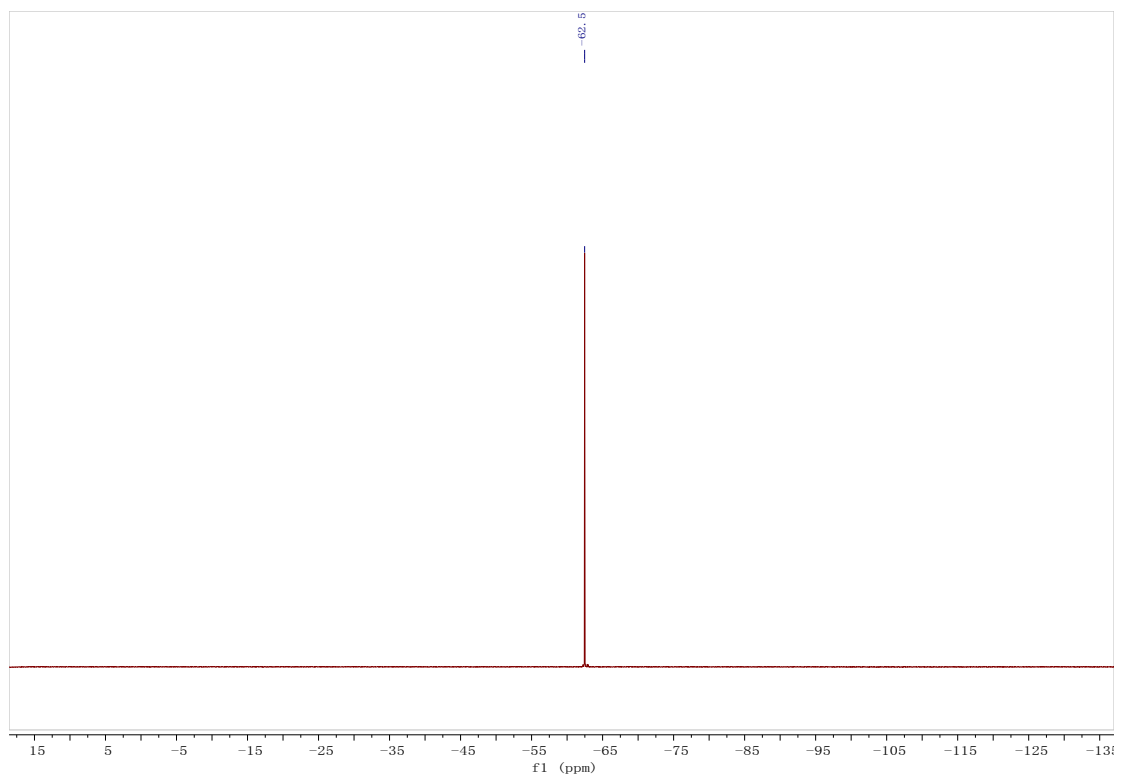

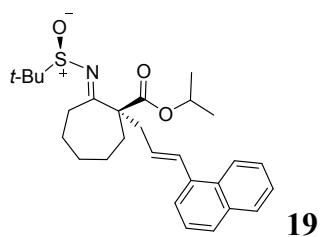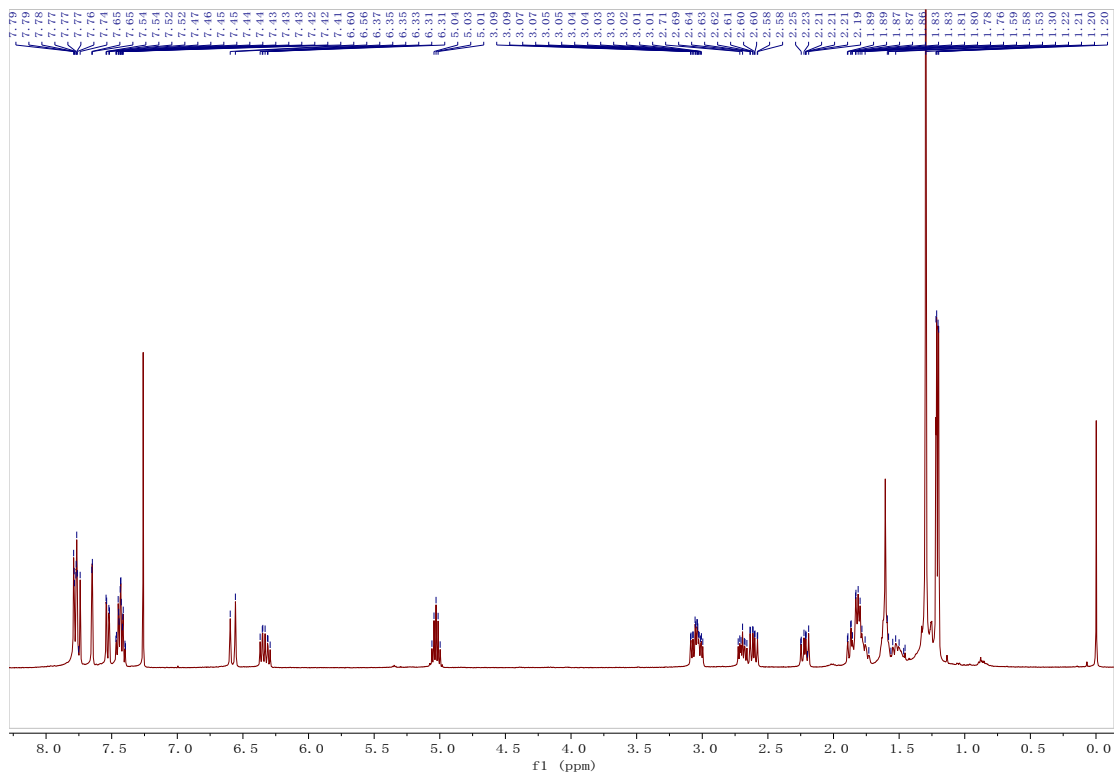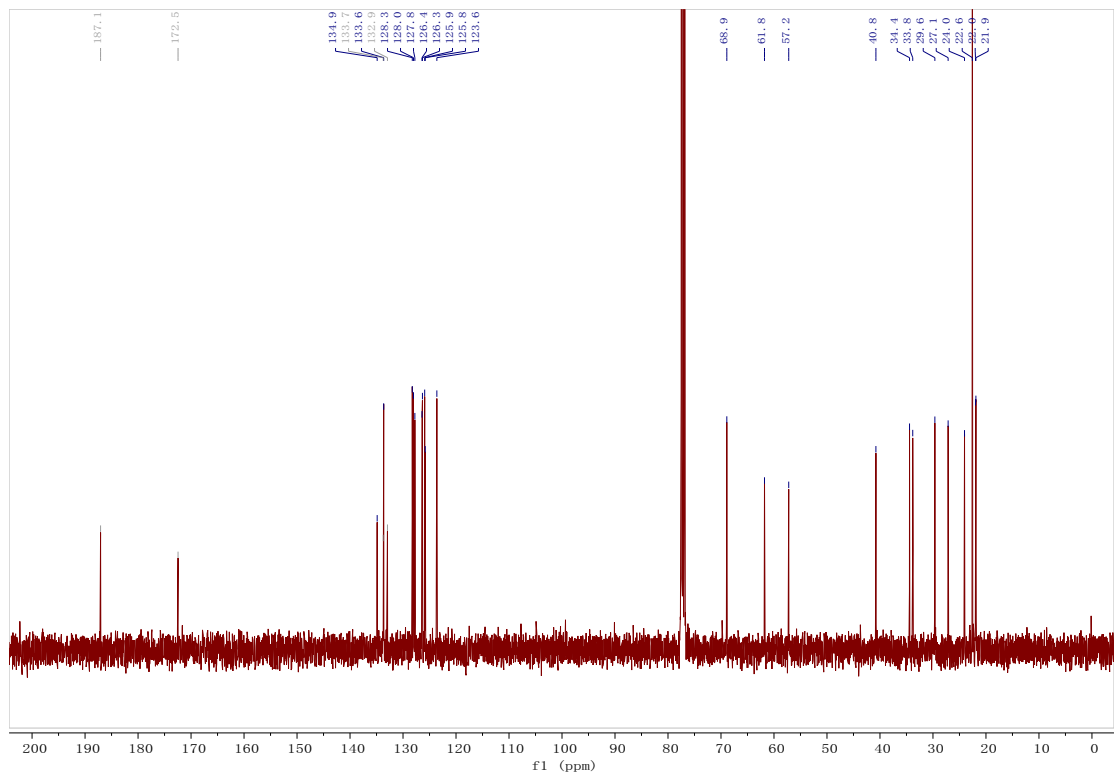

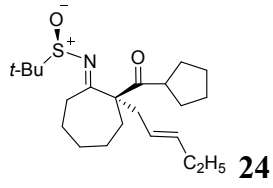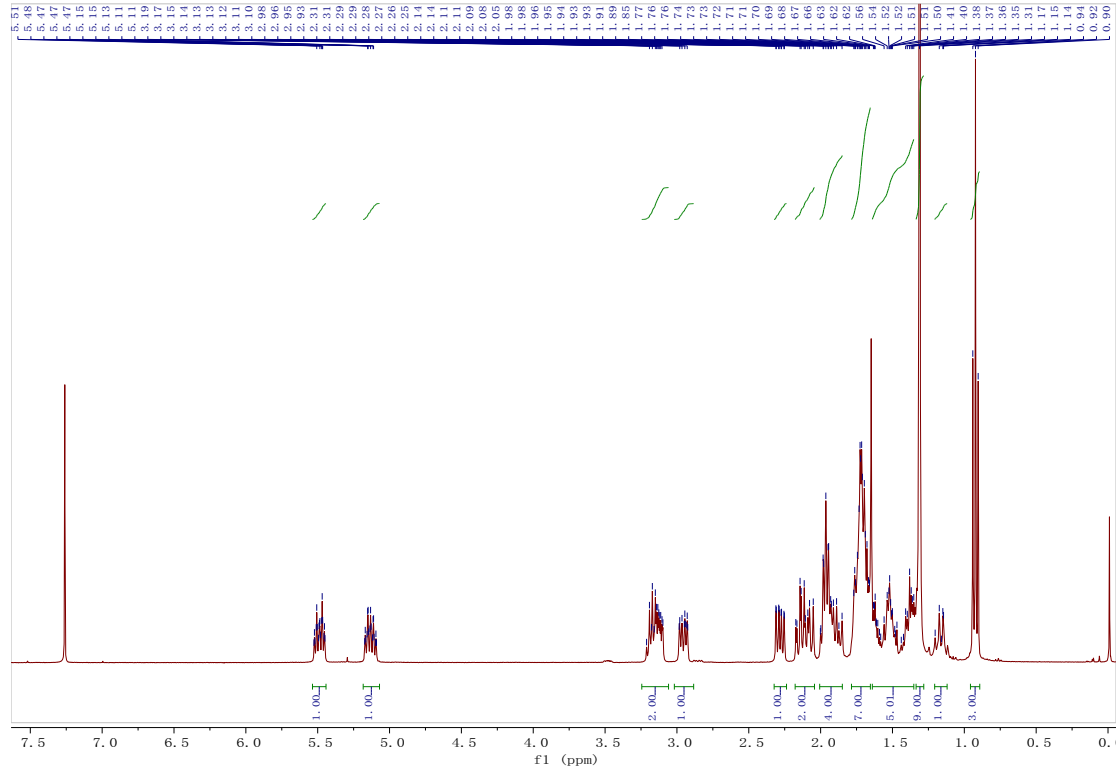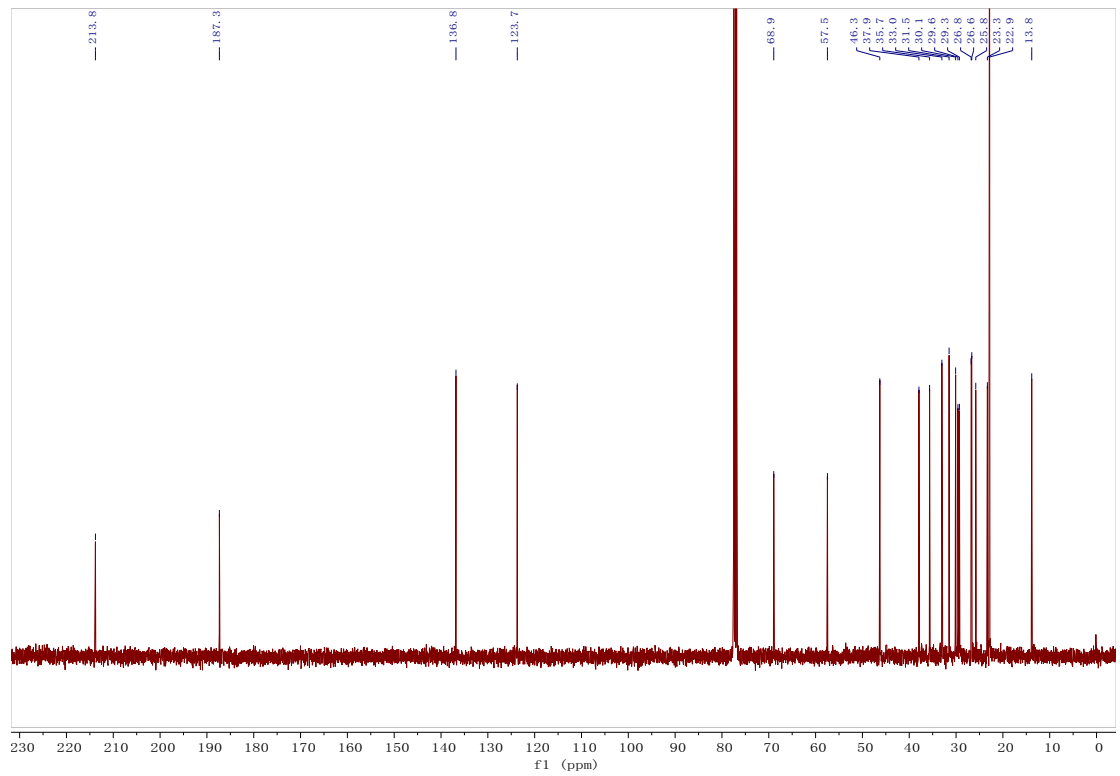

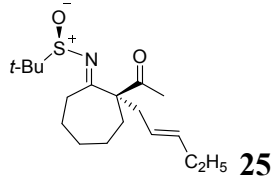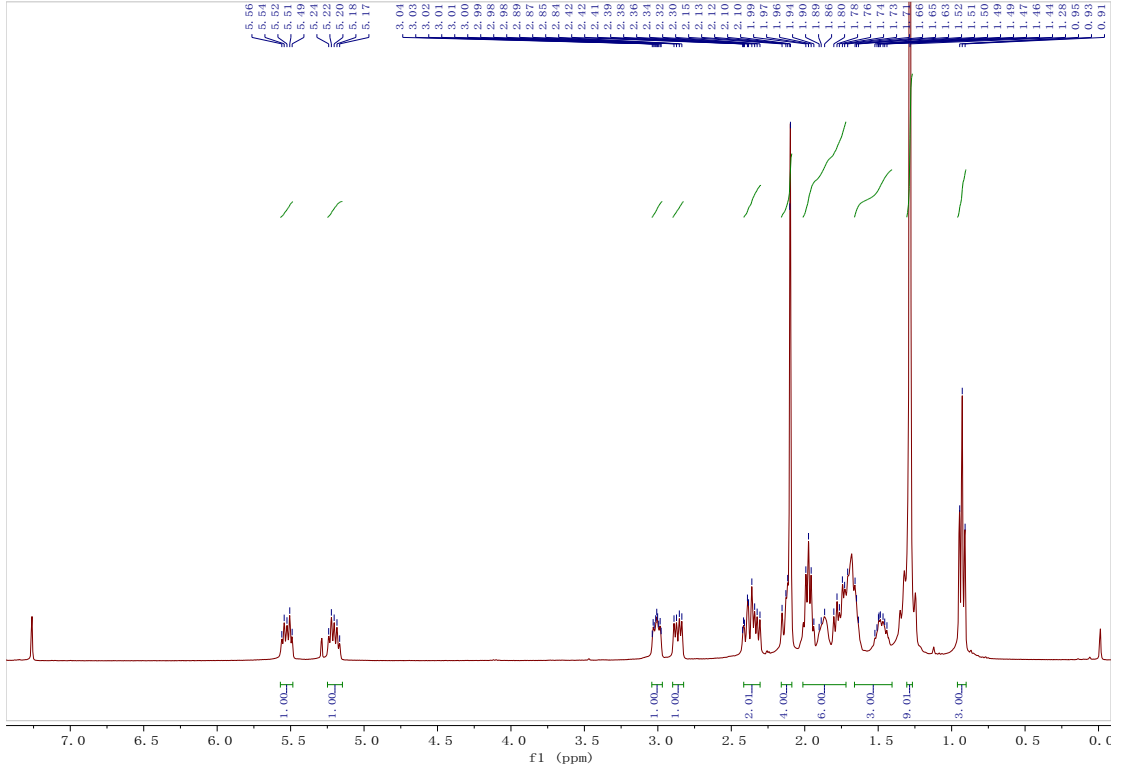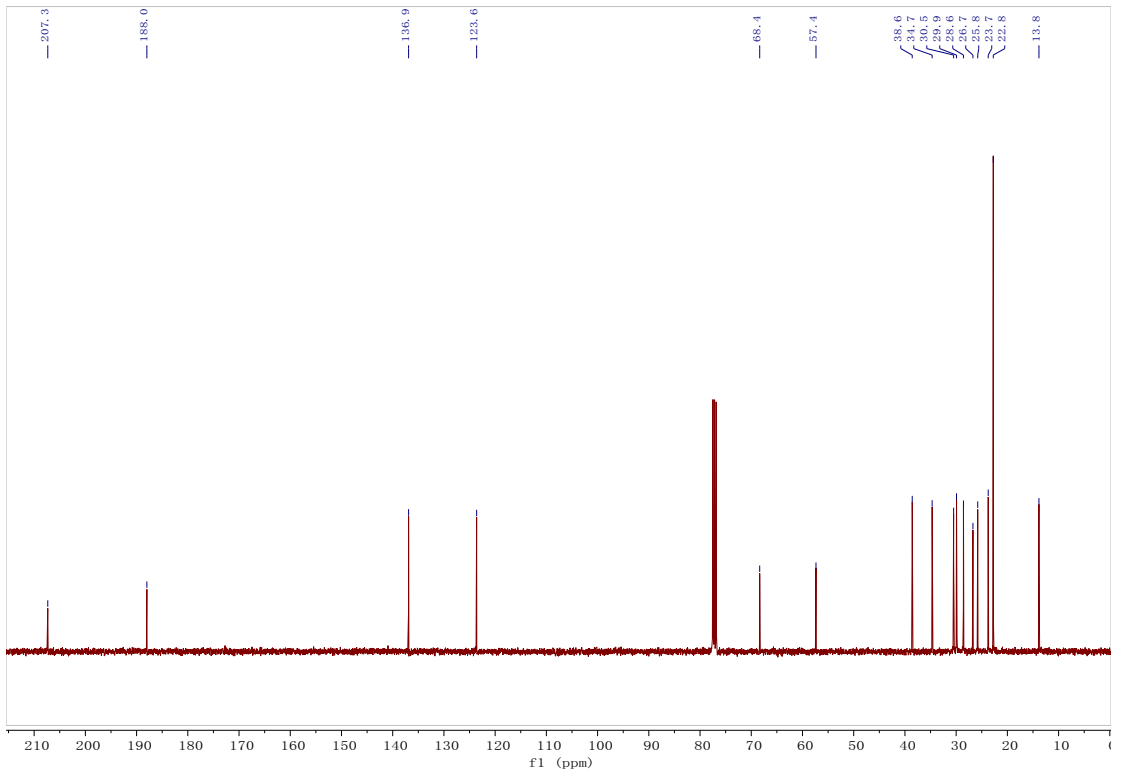

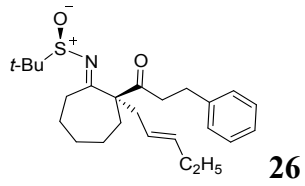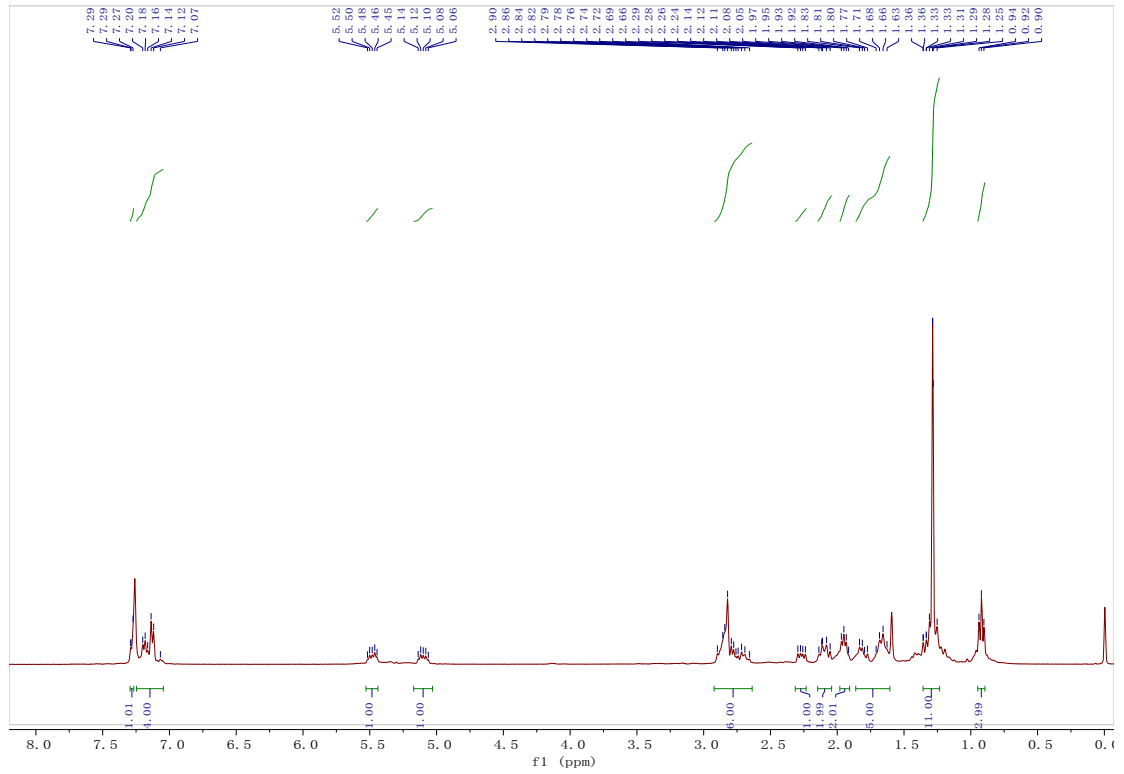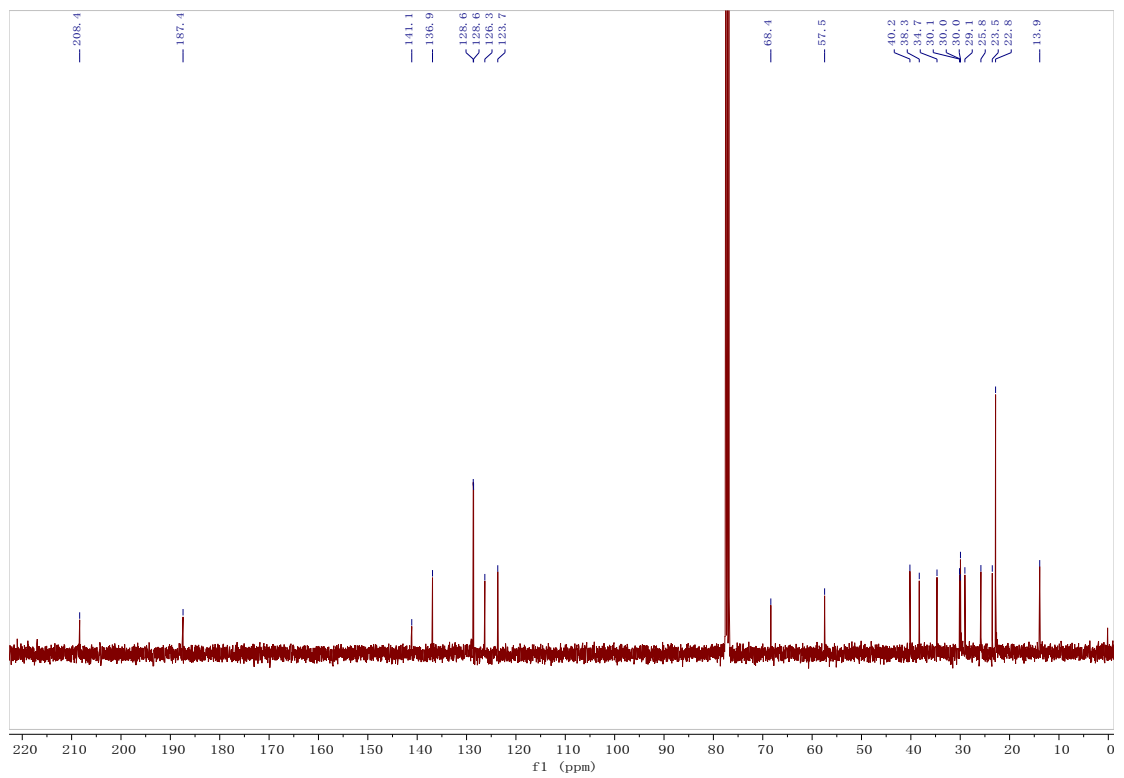

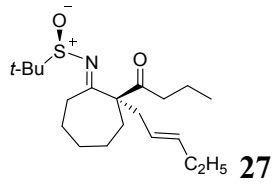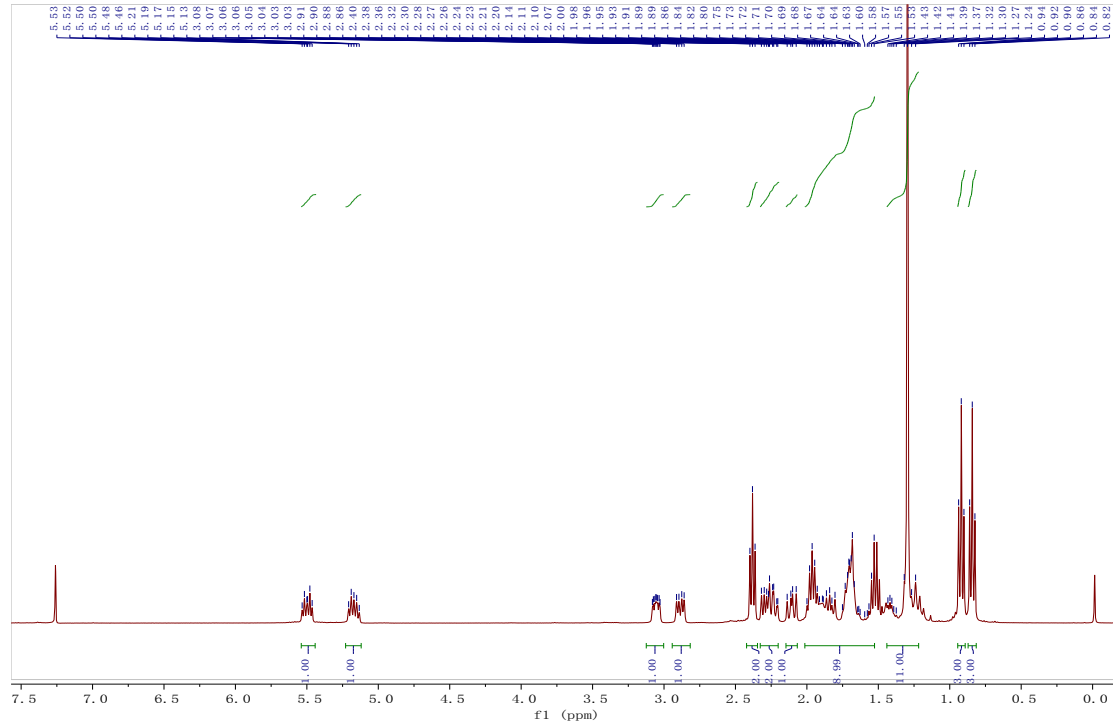

— 209.35

— 187.76

— 136.77

— 123.75

— 68.29

— 57.40

— 40.29

— 38.35

— 35.02

— 30.08

— 30.00

— 29.08

— 25.80

— 23.48

— 22.78

— 17.37

— 13.92

— 13.85

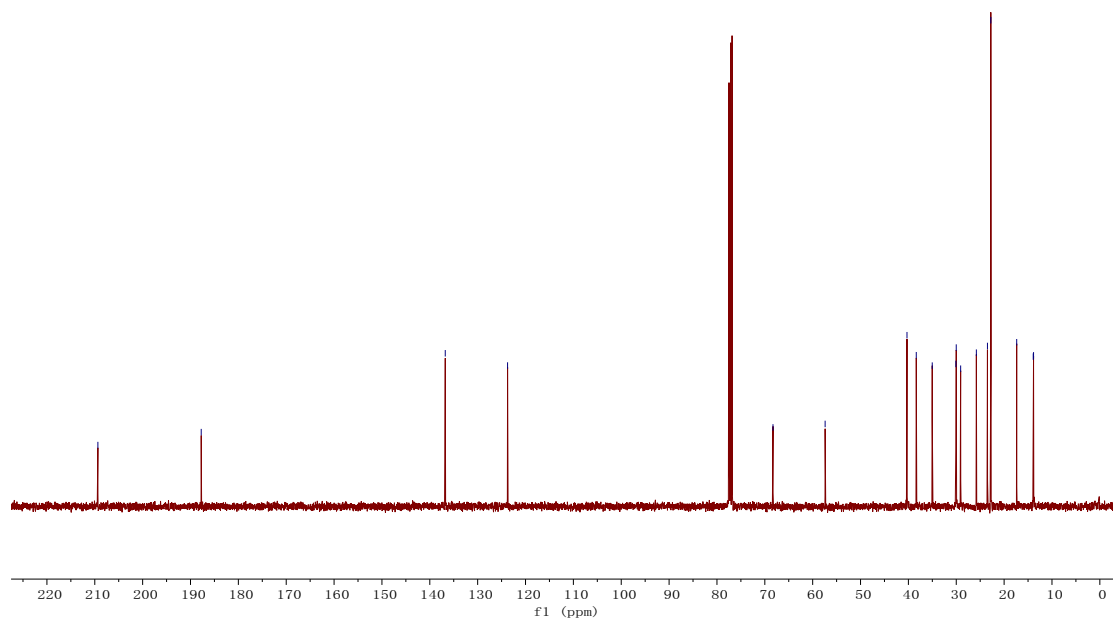

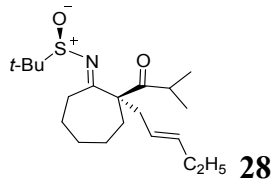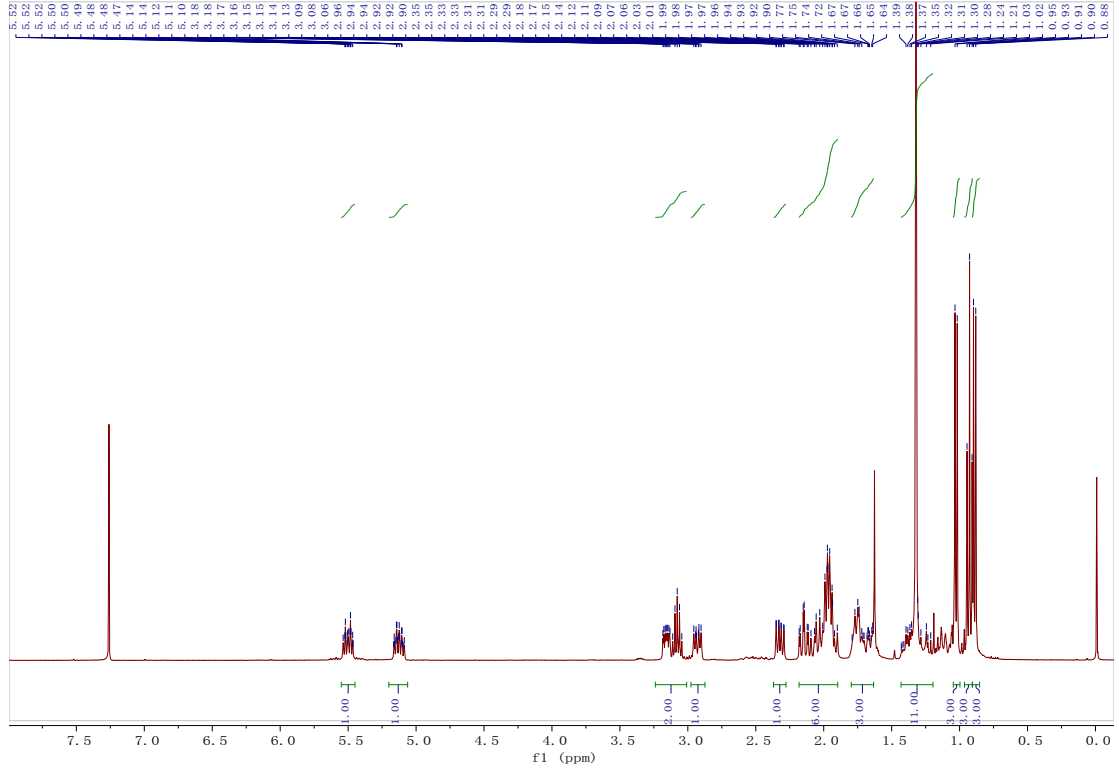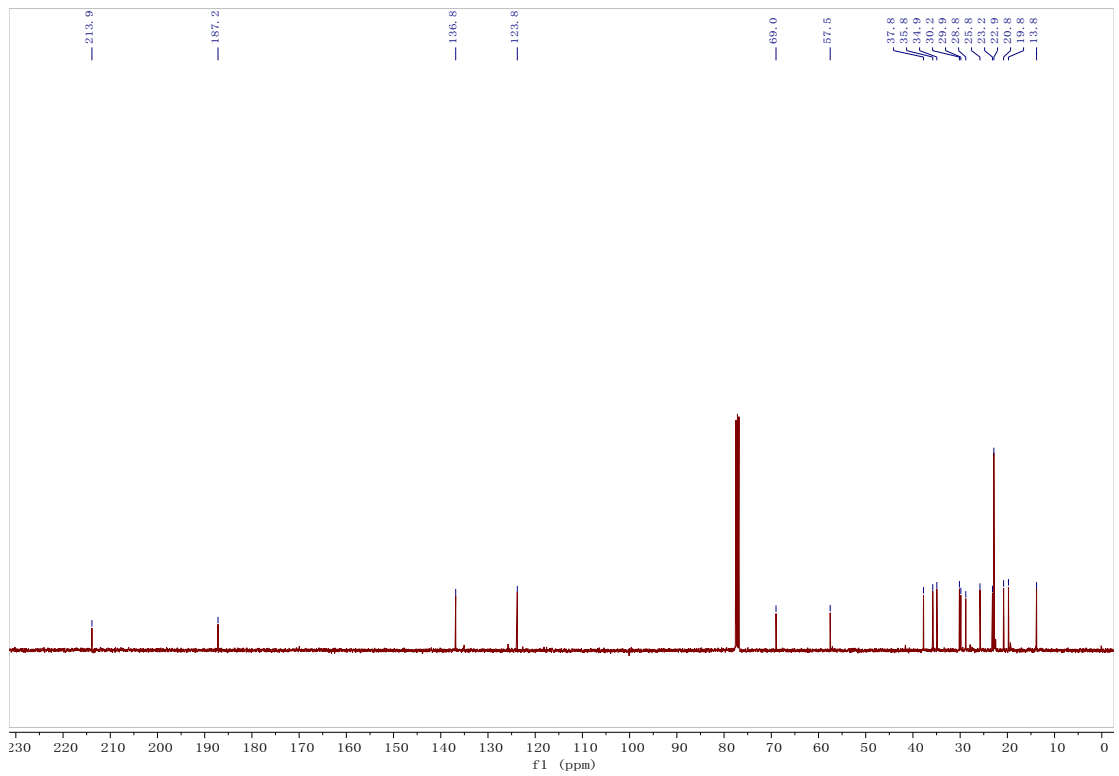

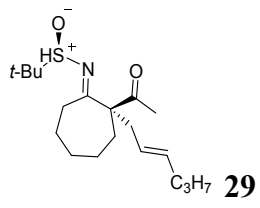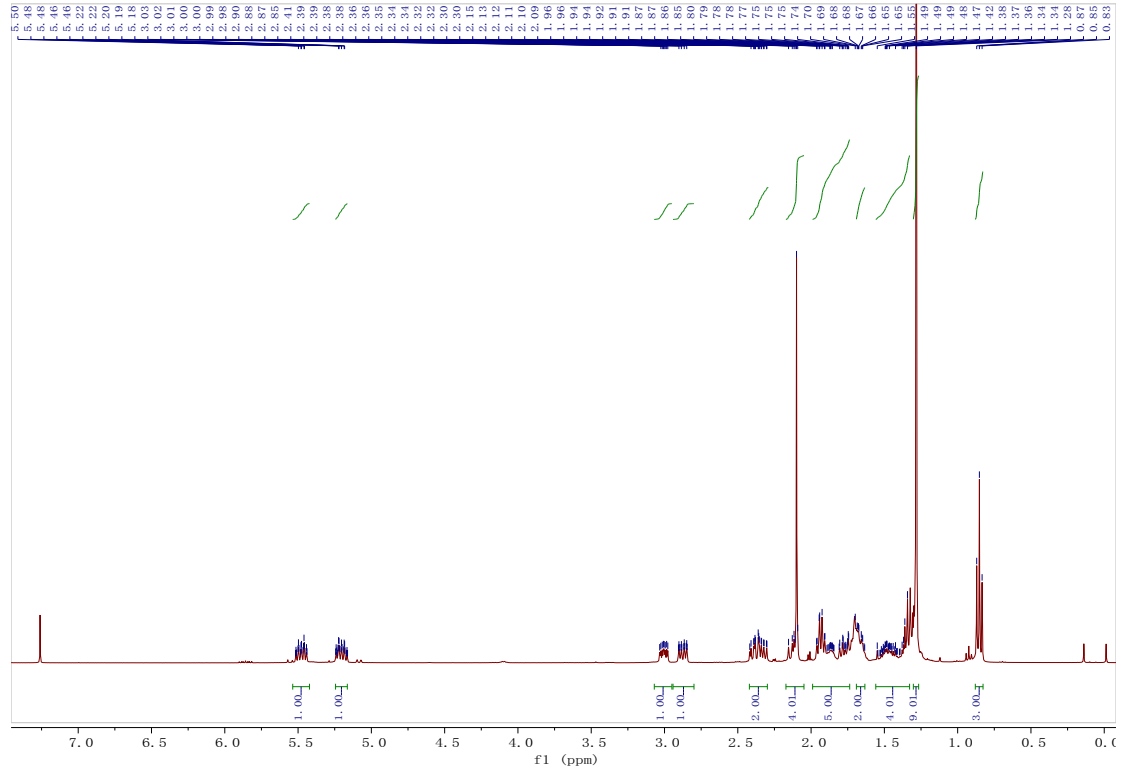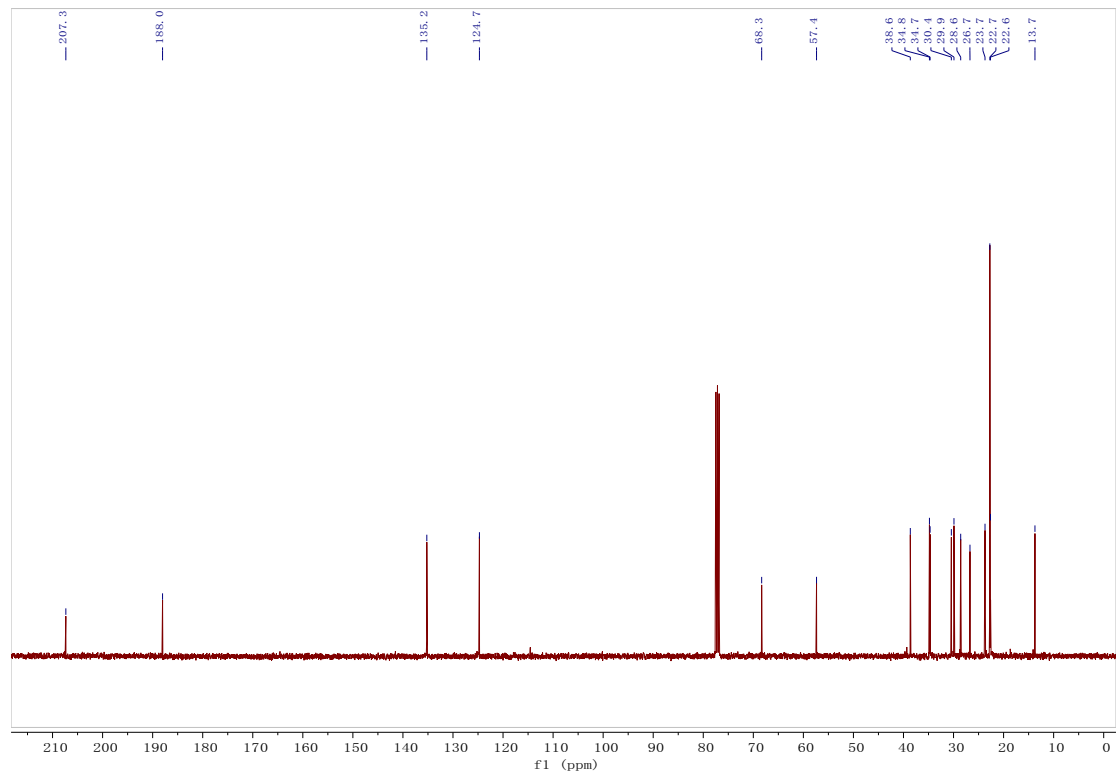



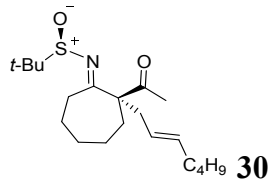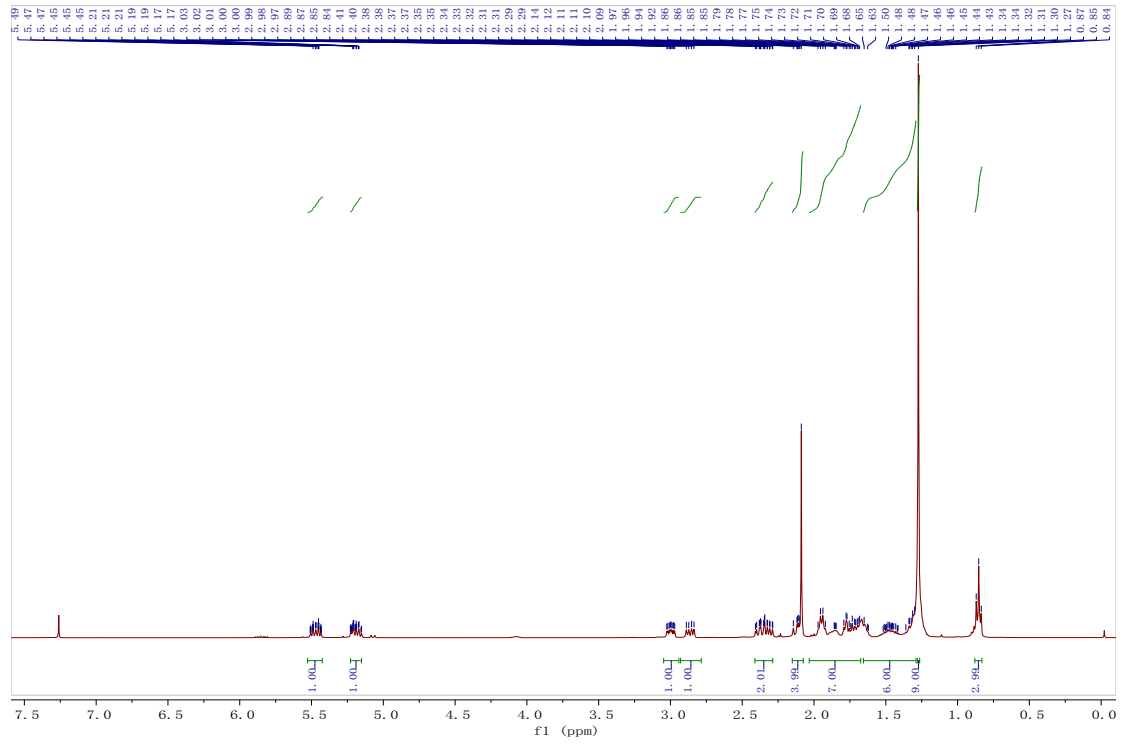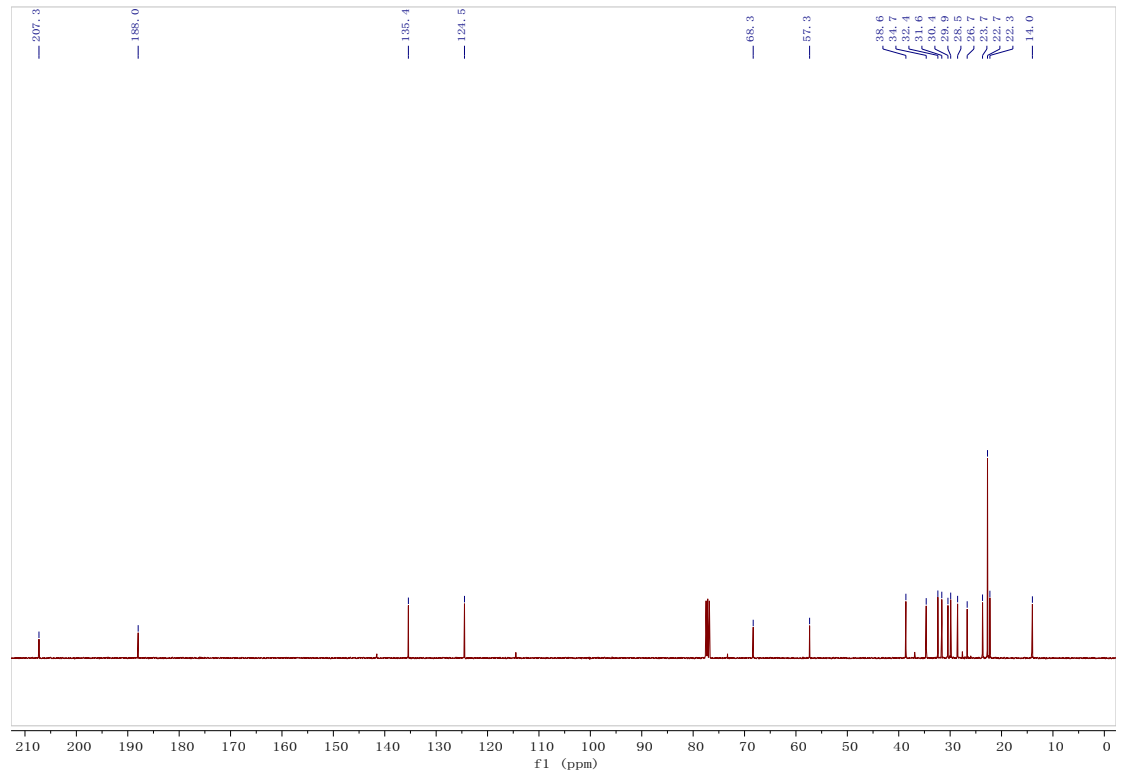

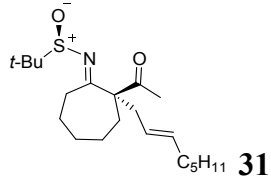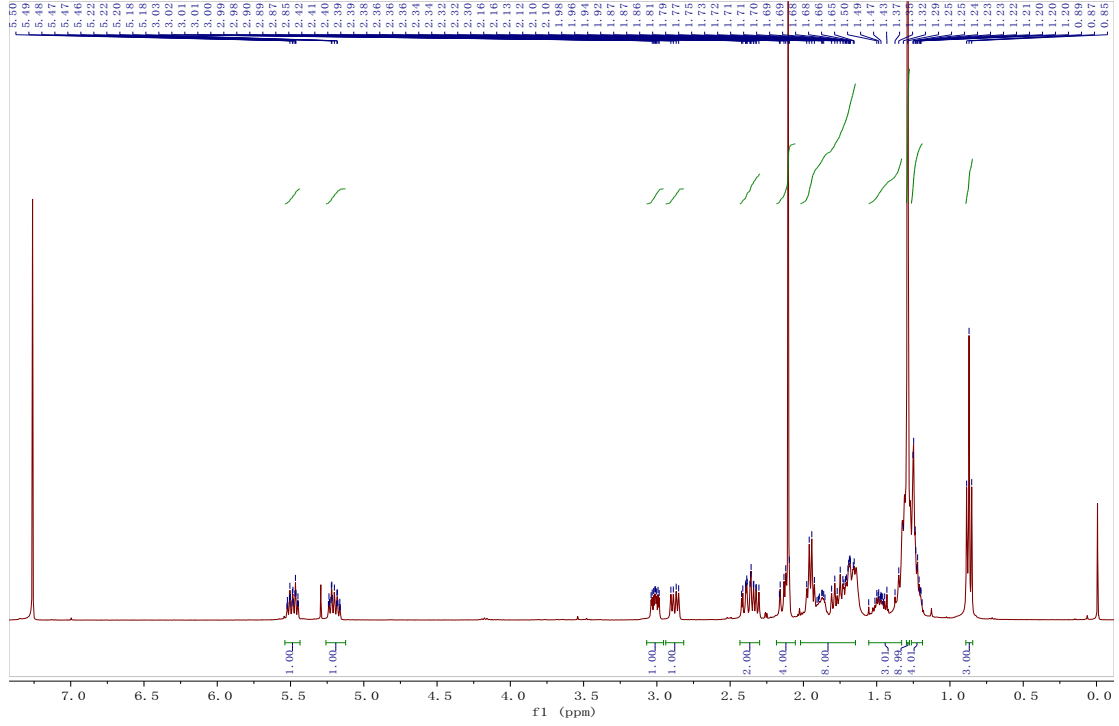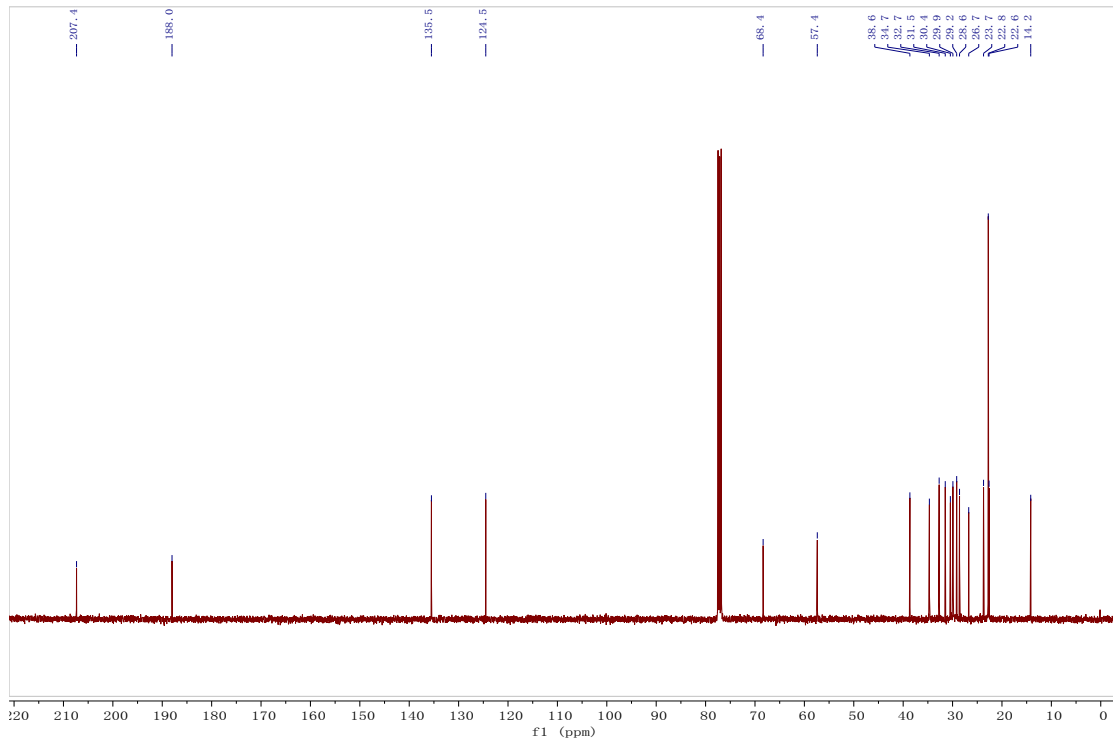

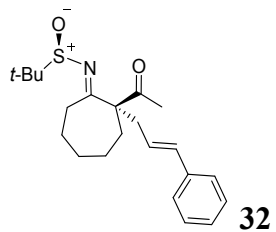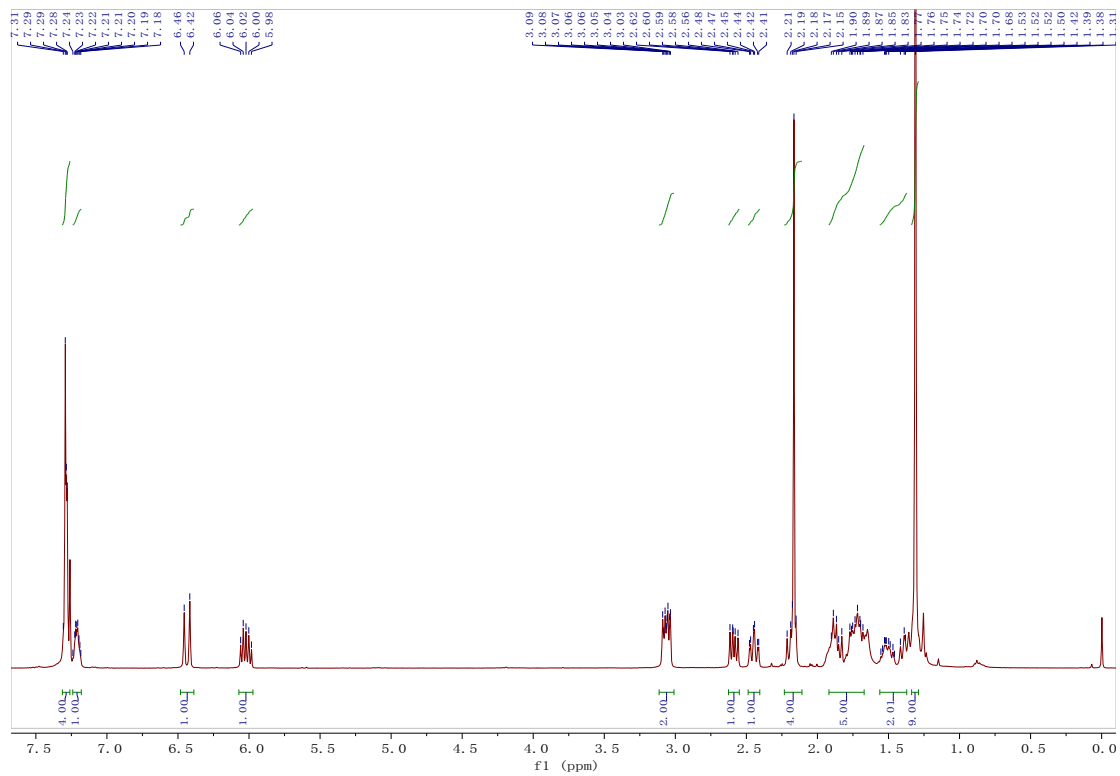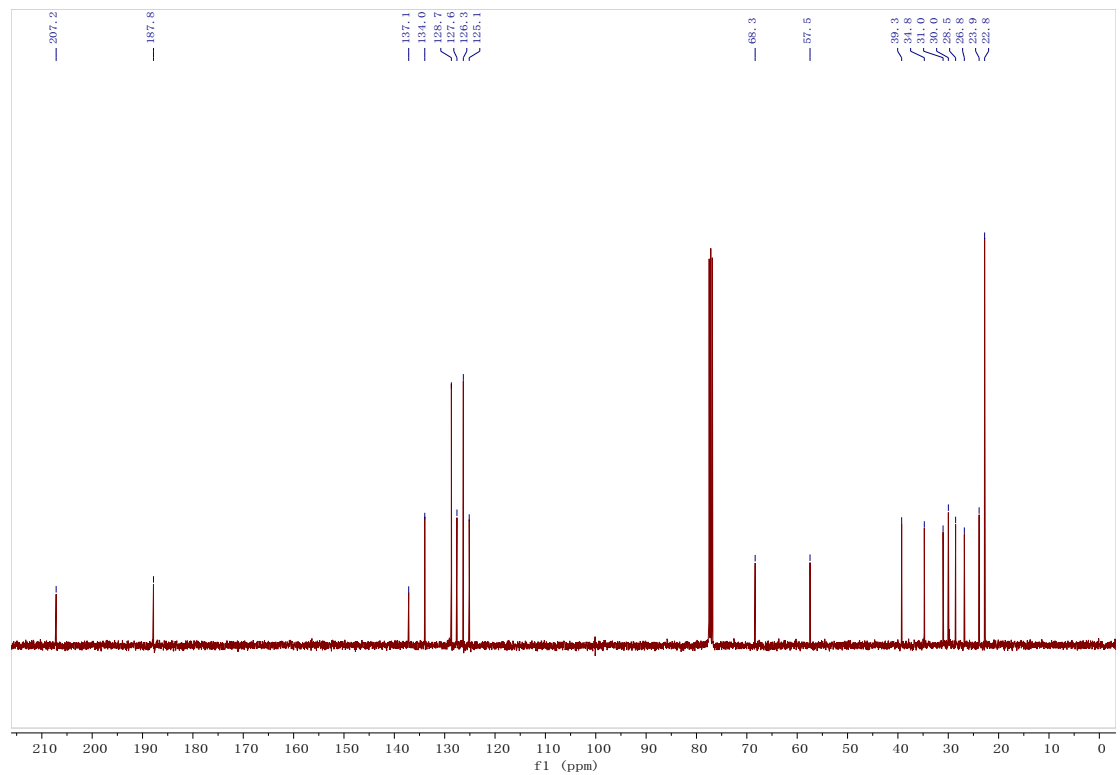

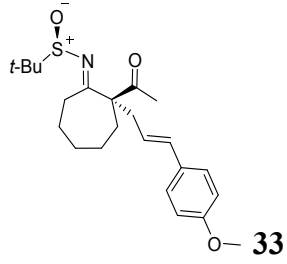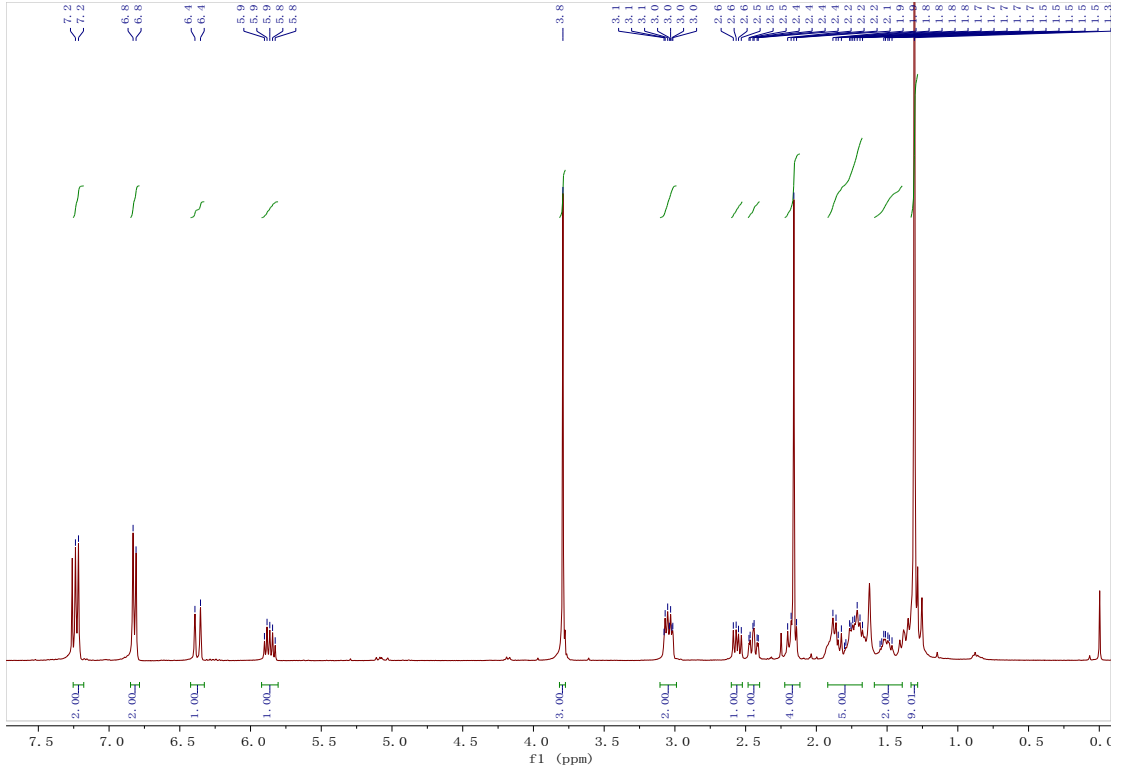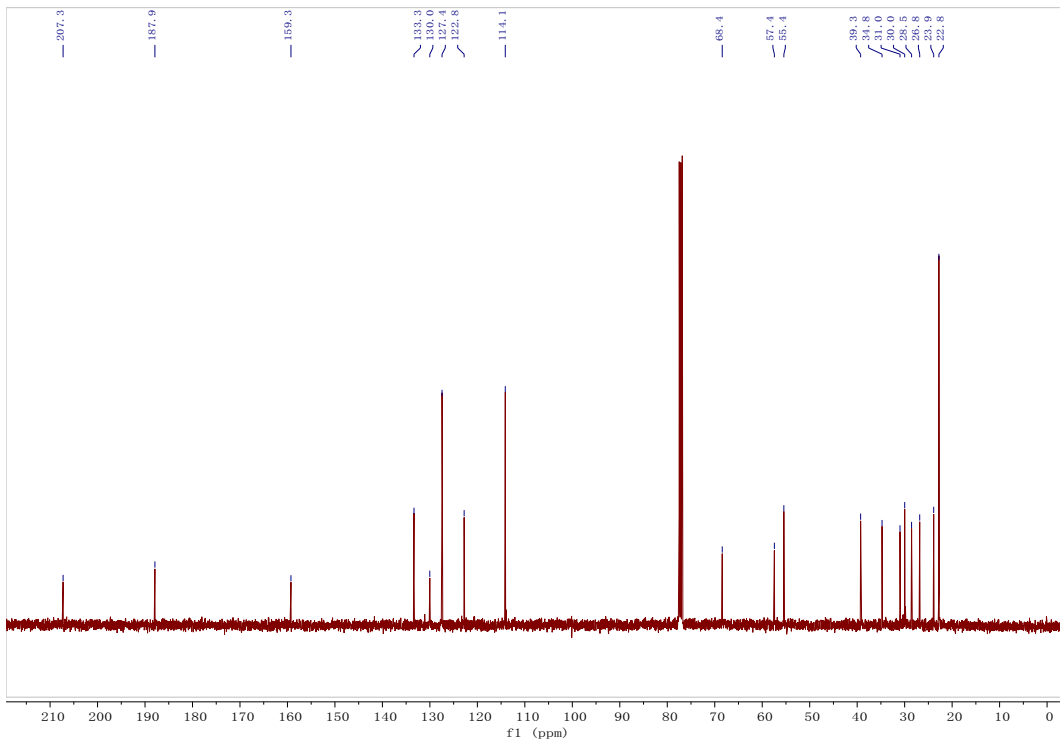

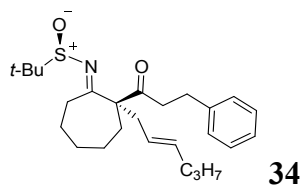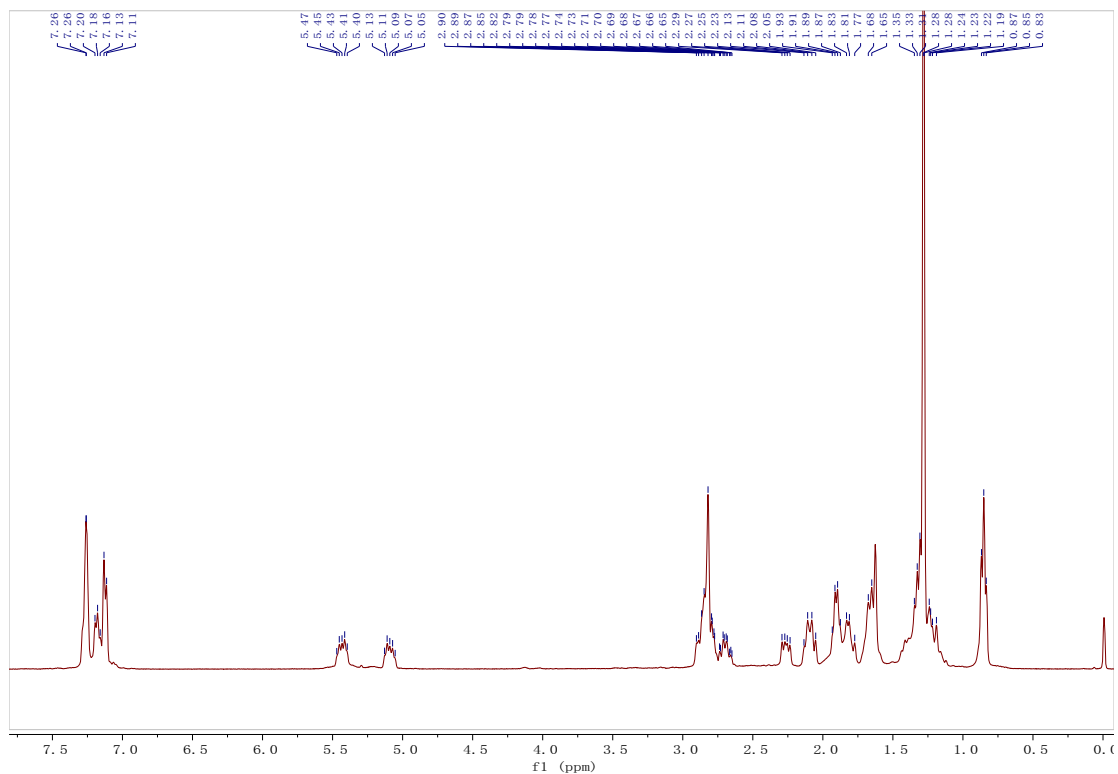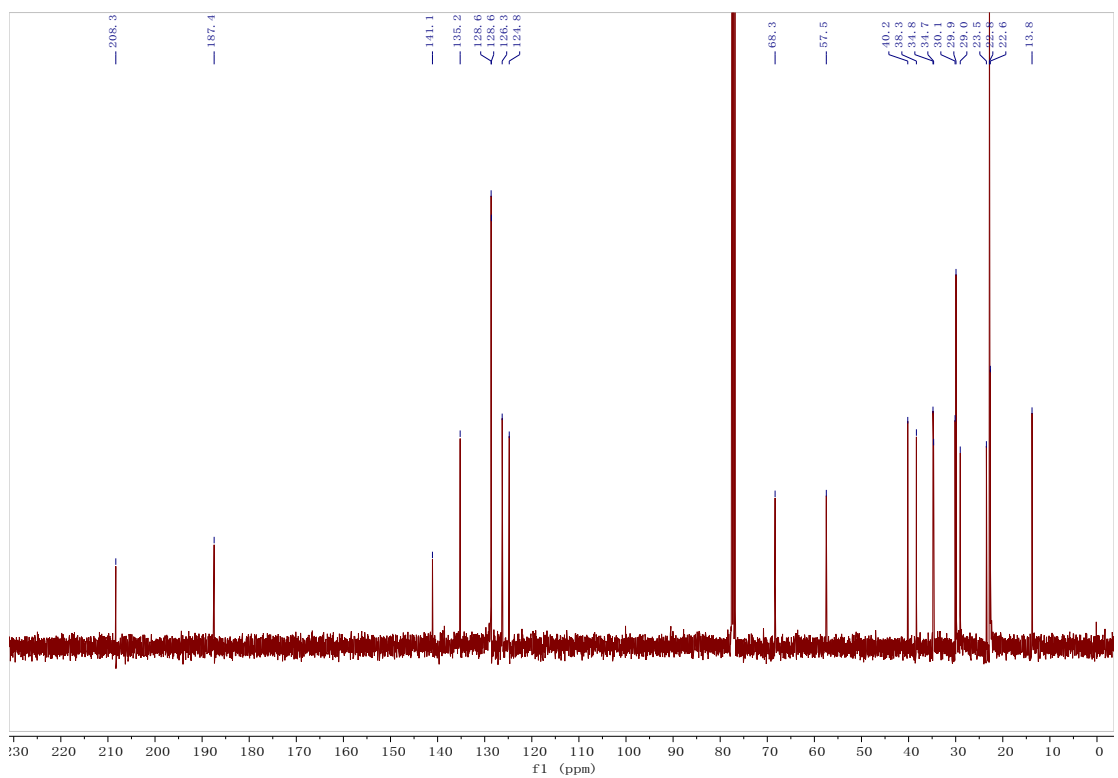

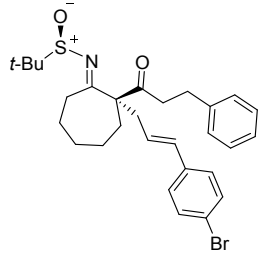

35

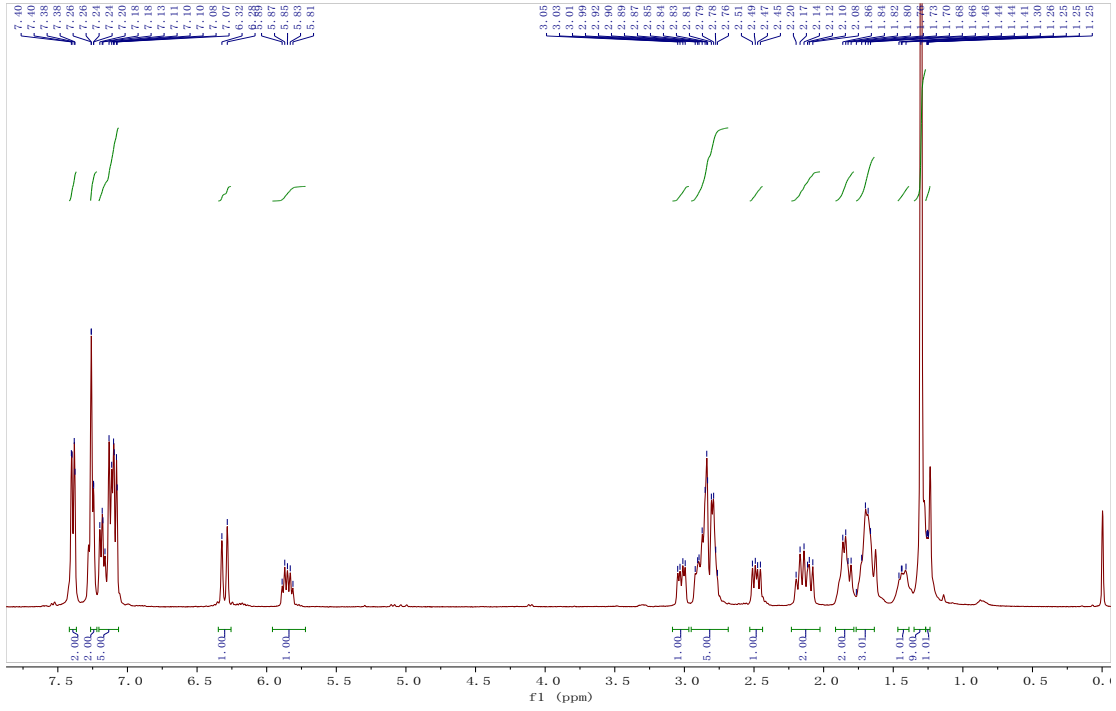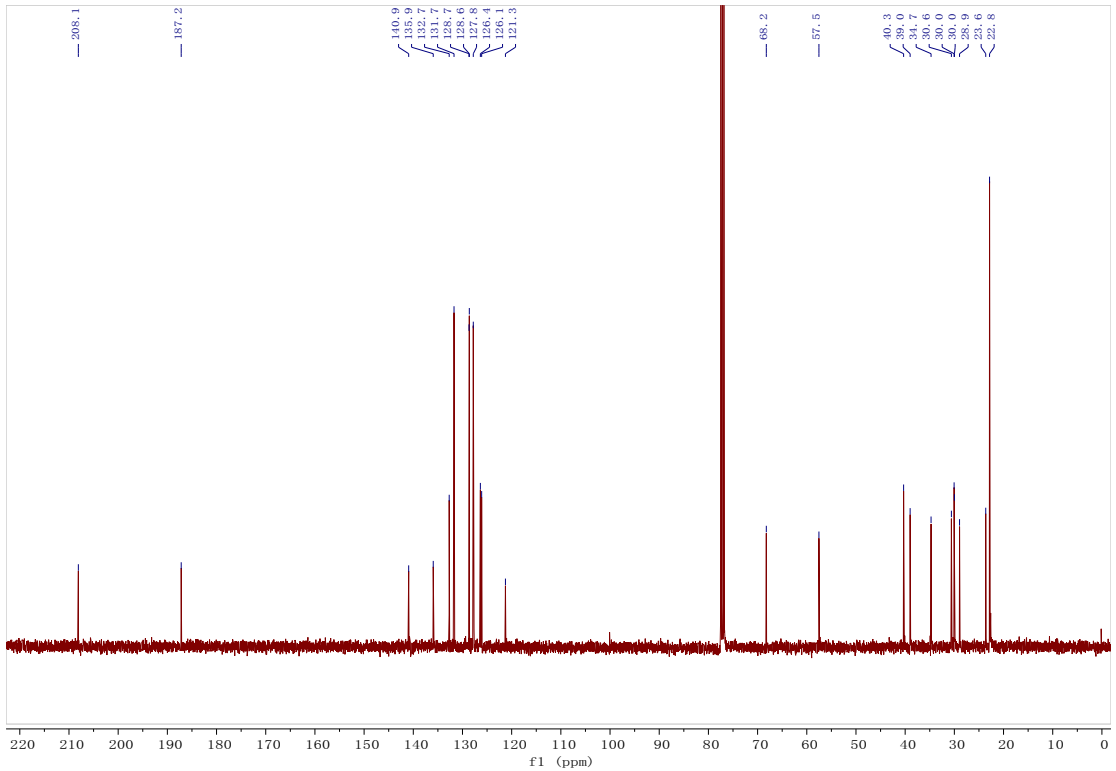

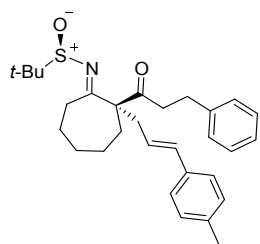

36

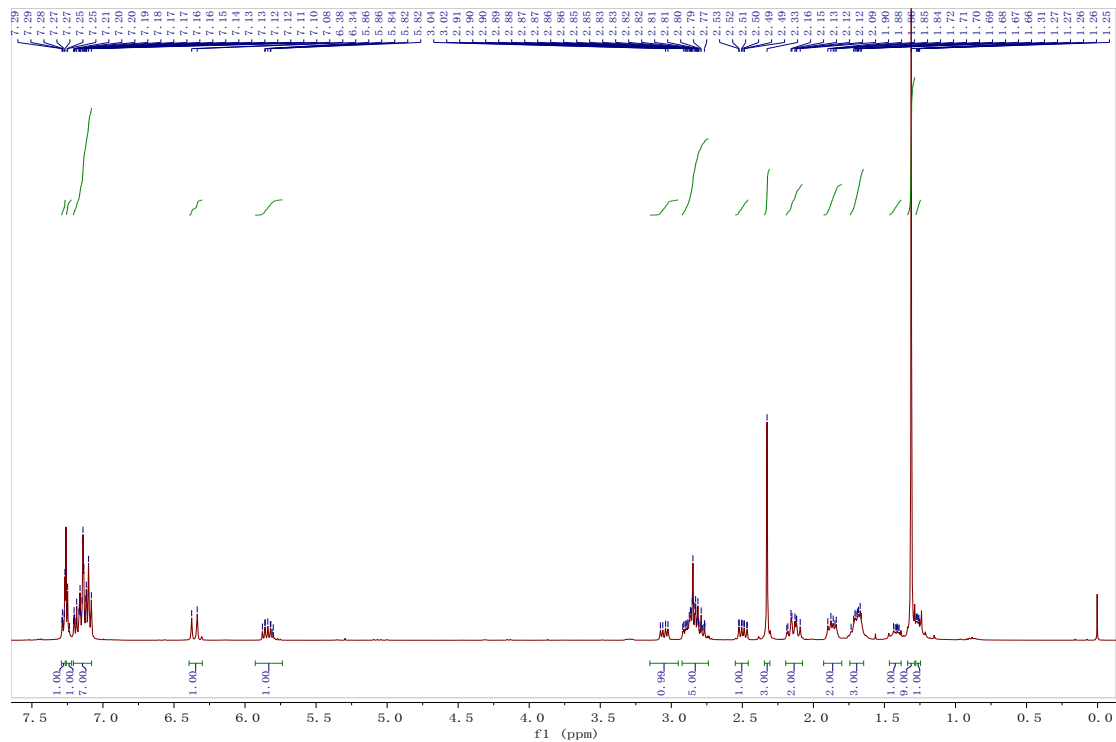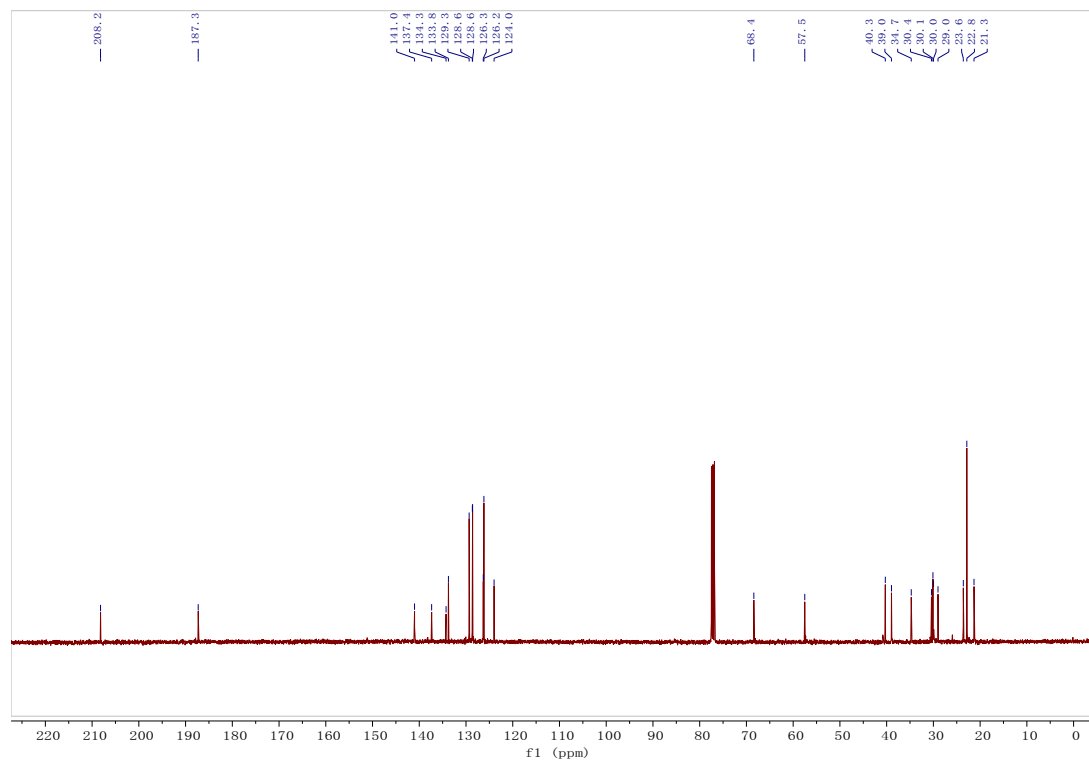

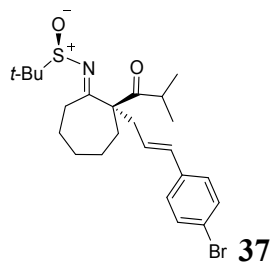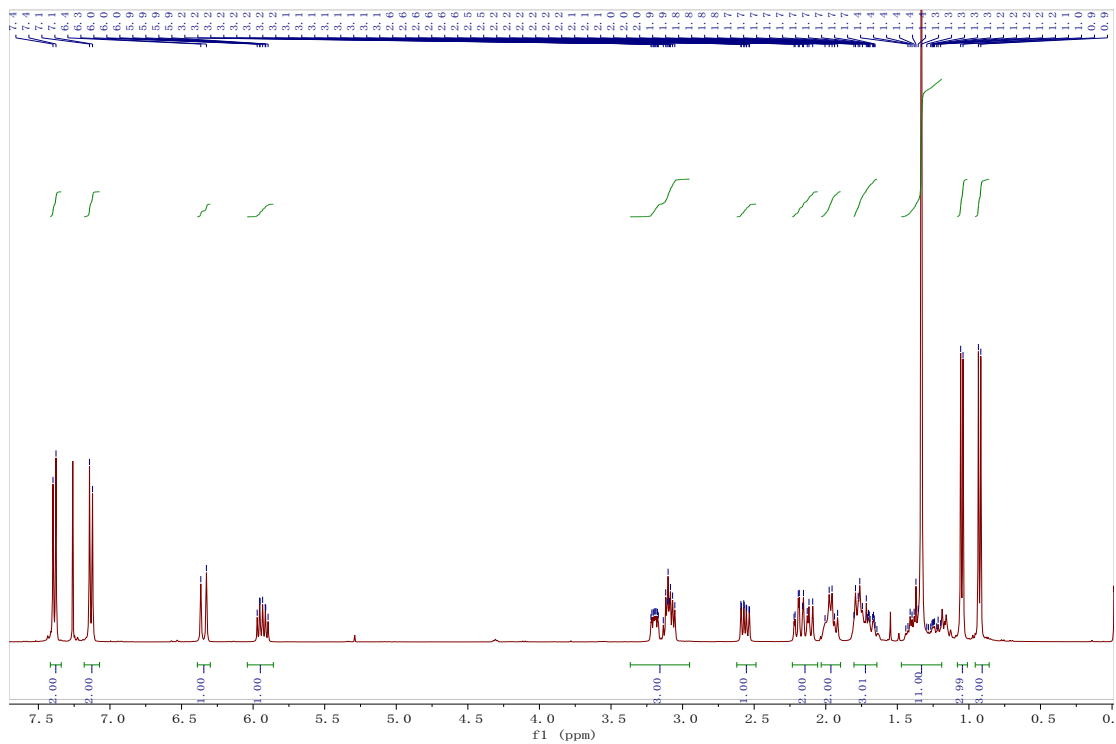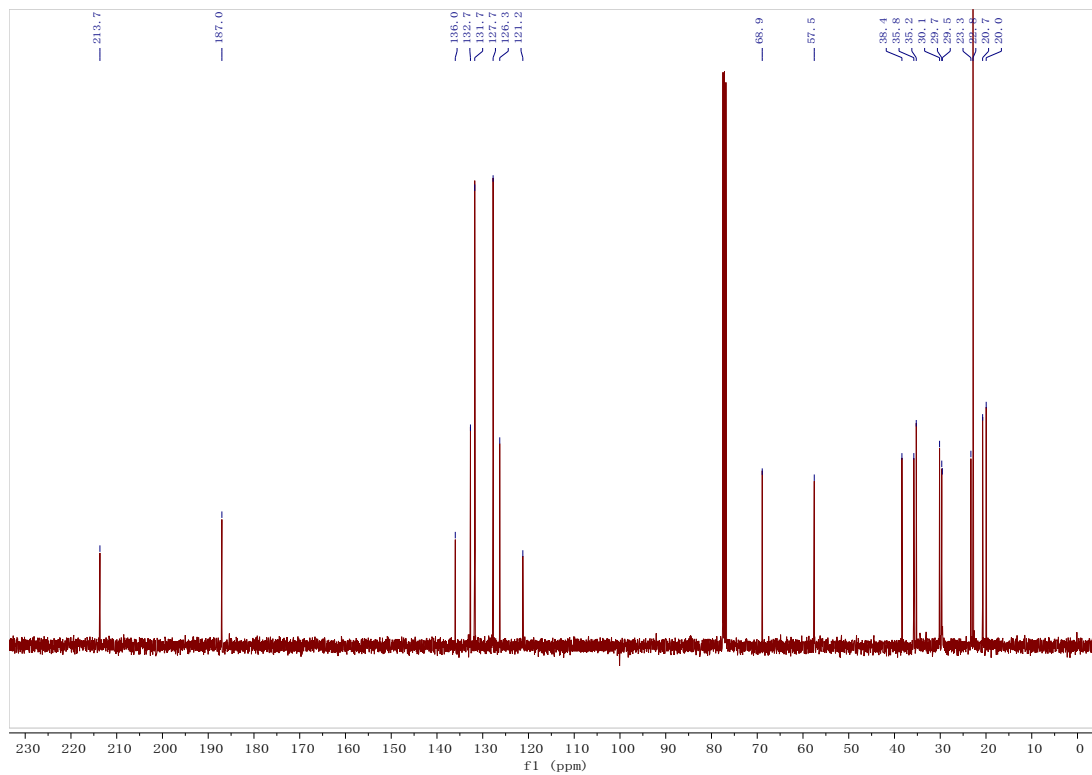



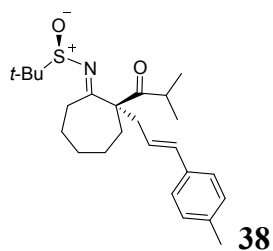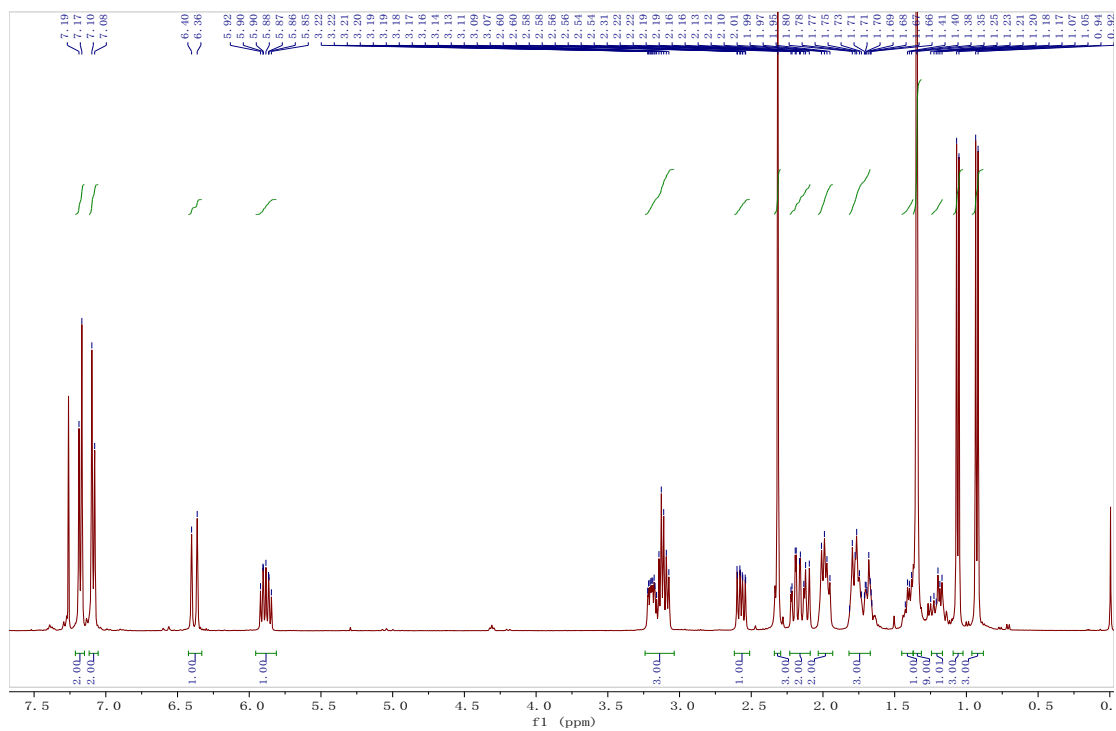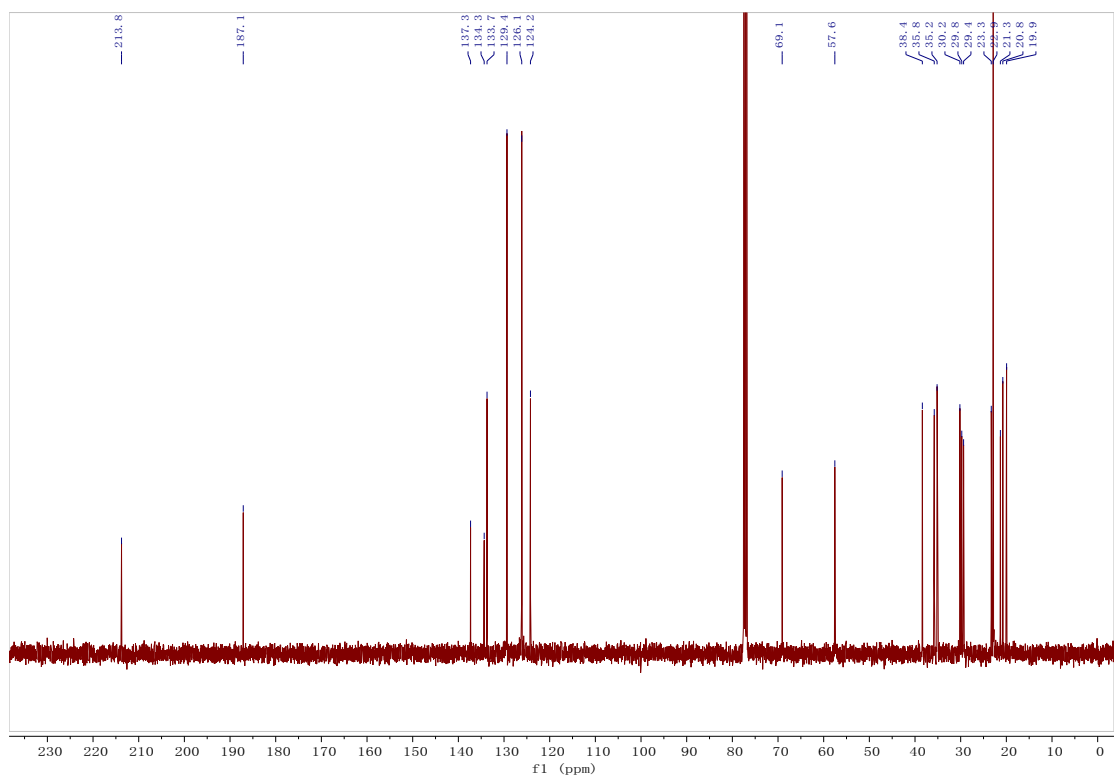

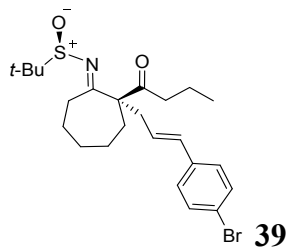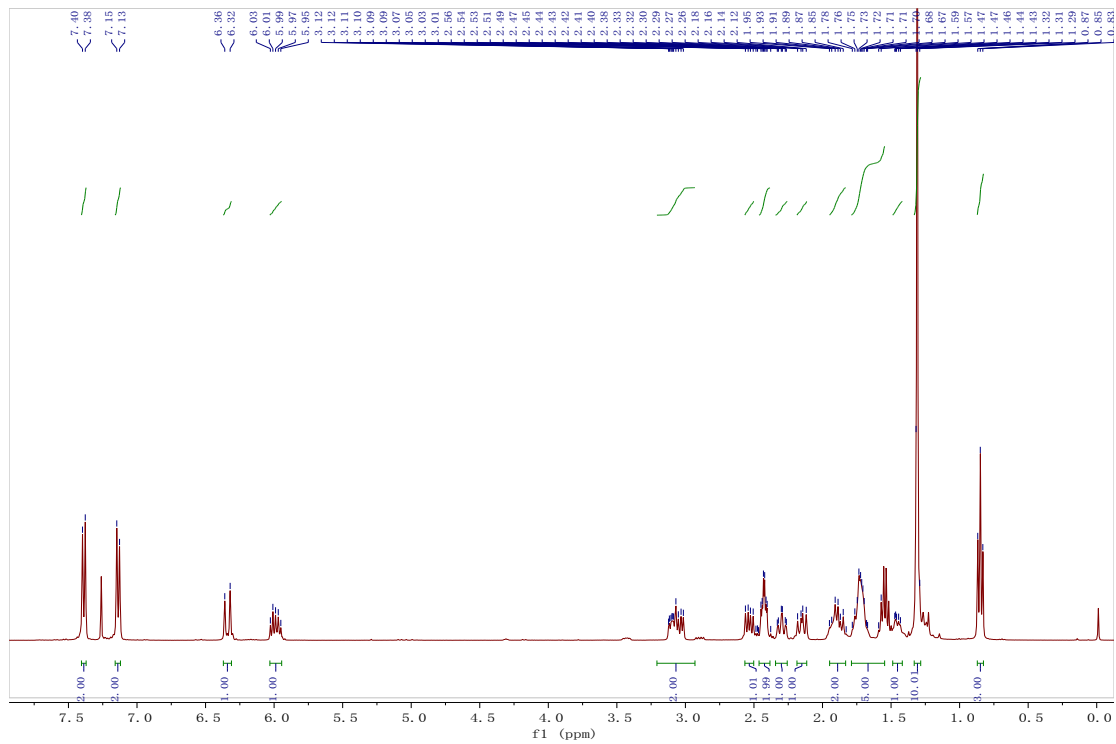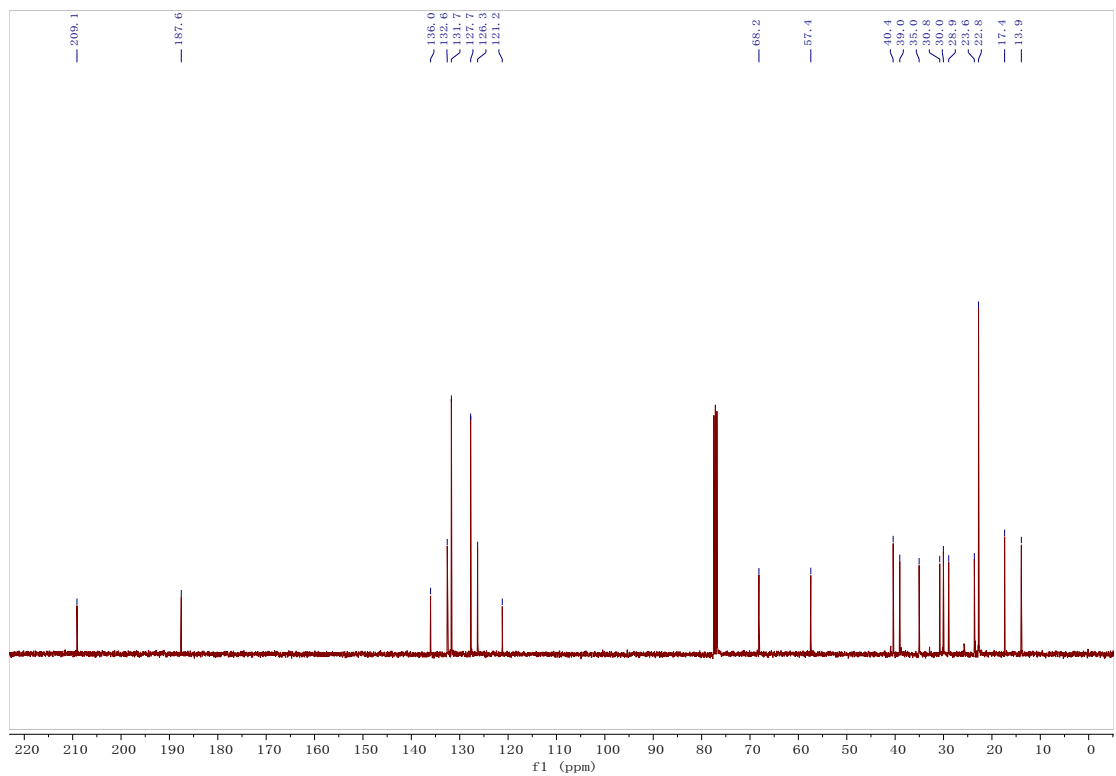

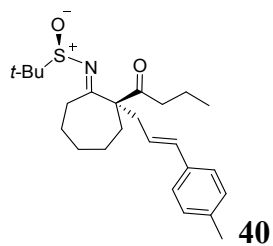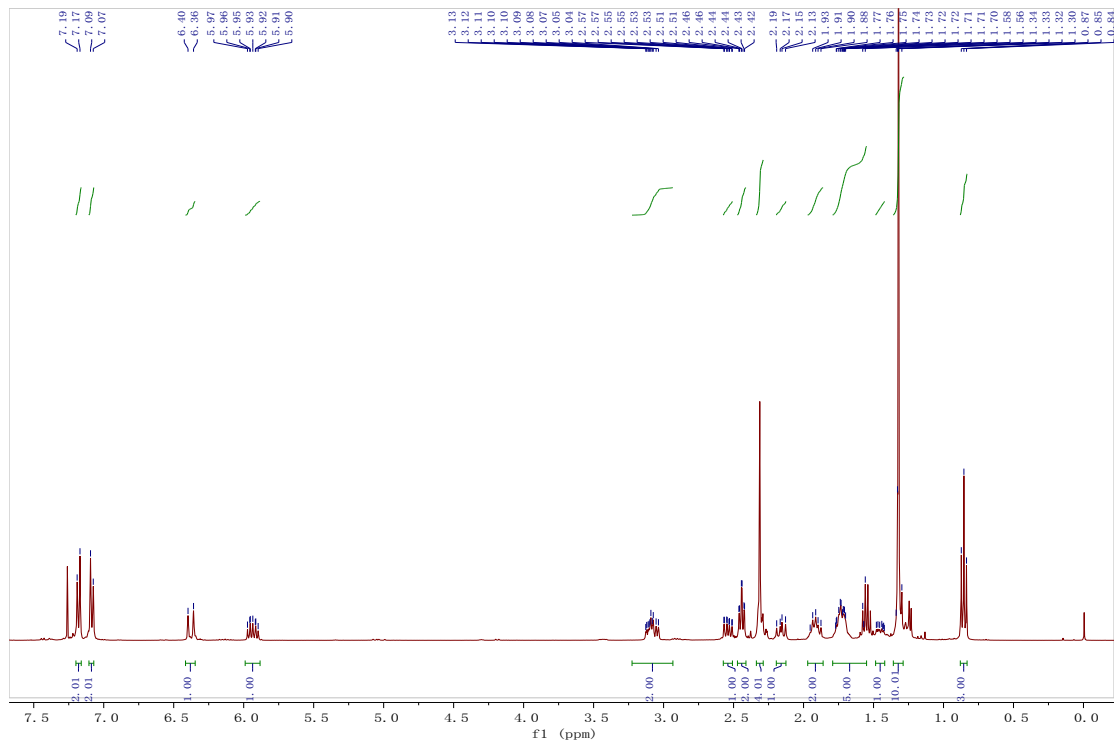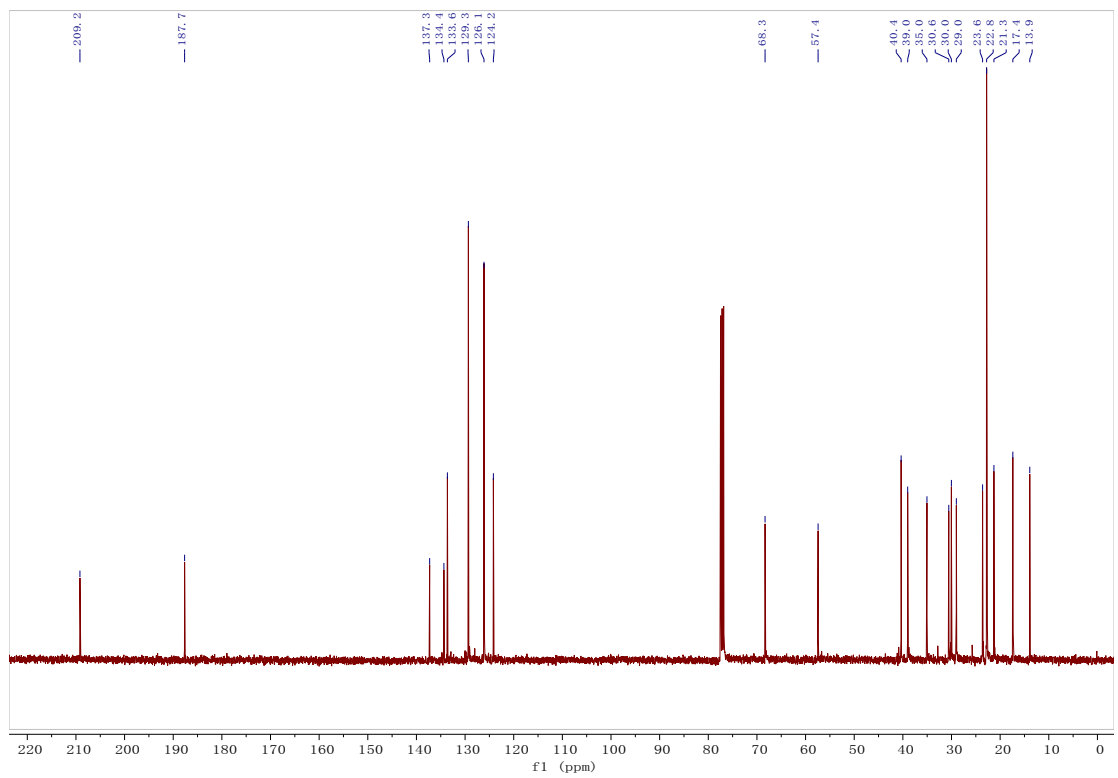

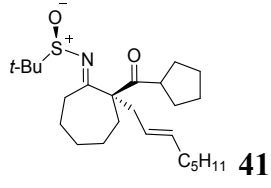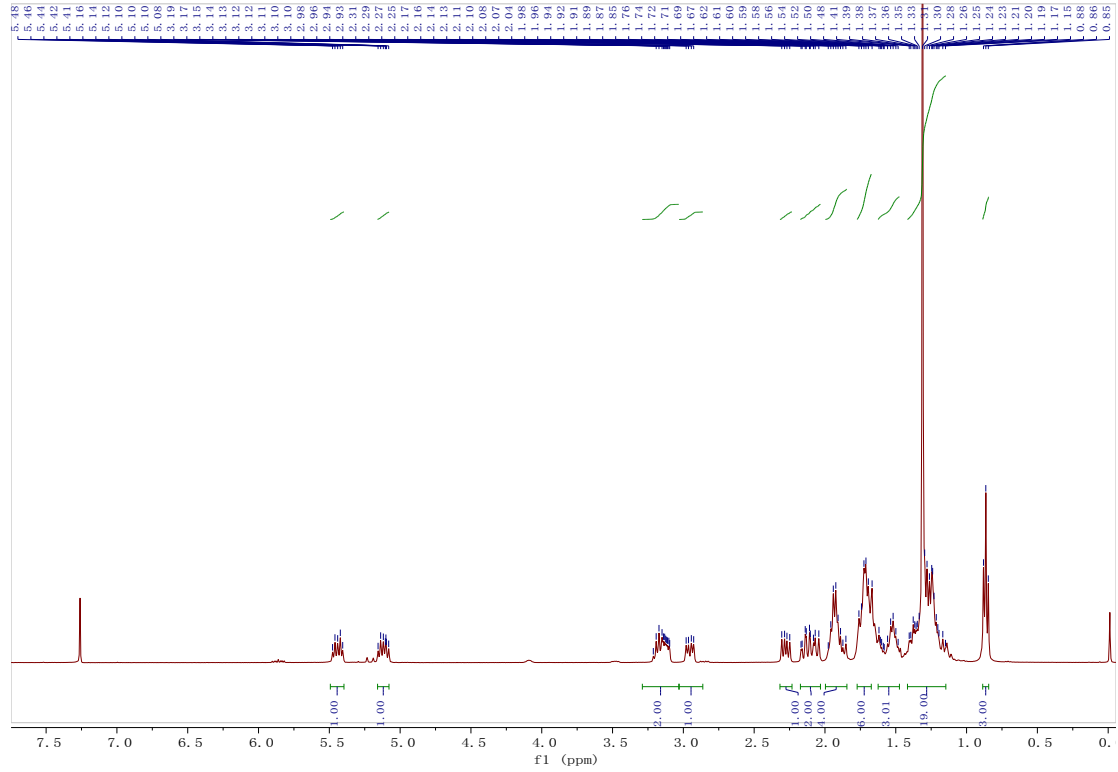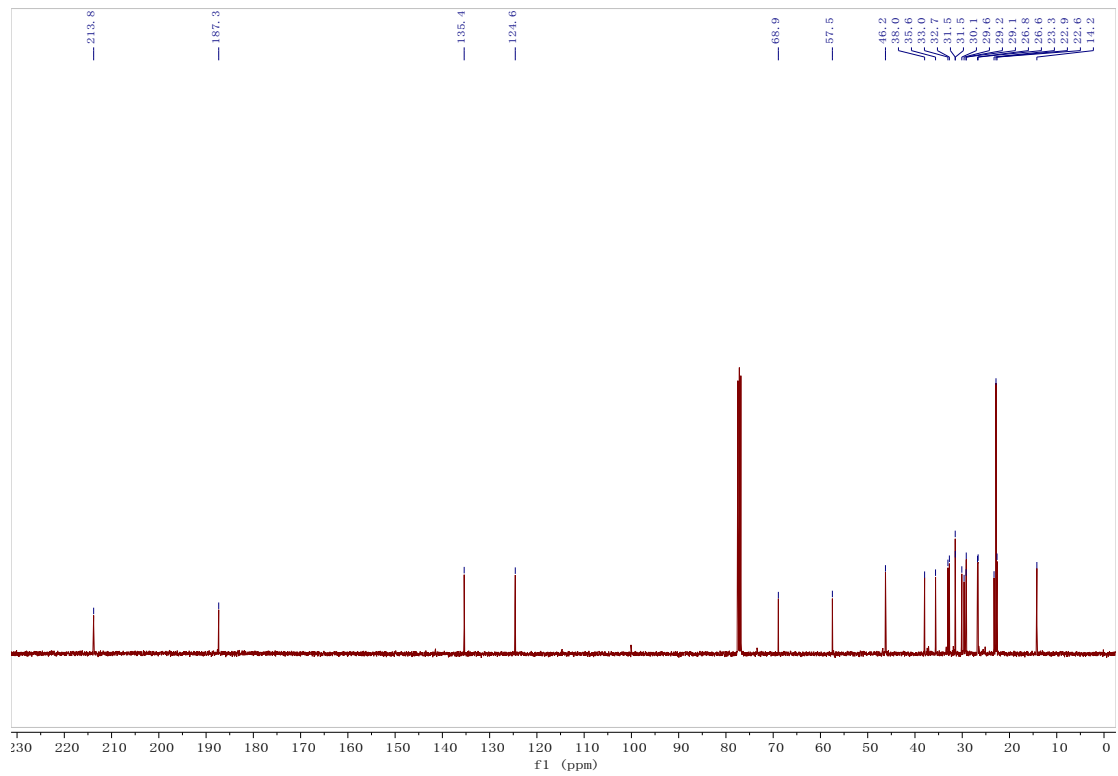

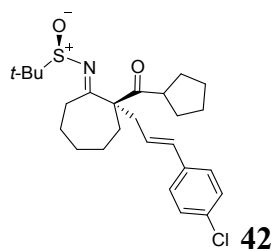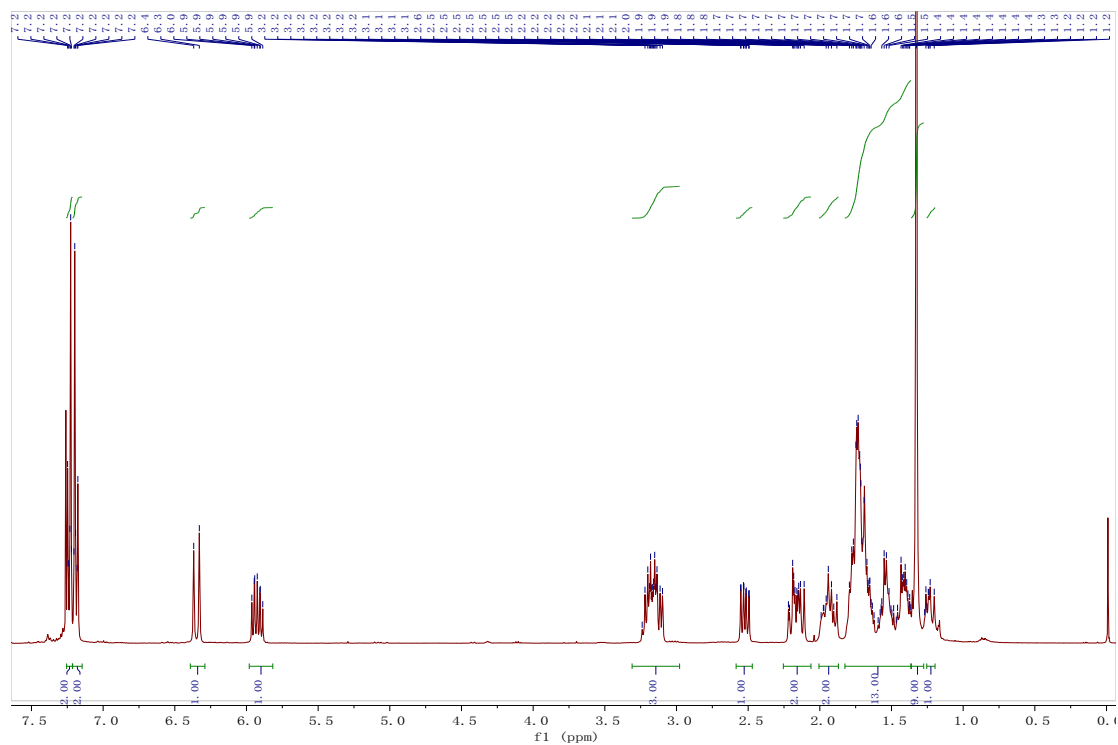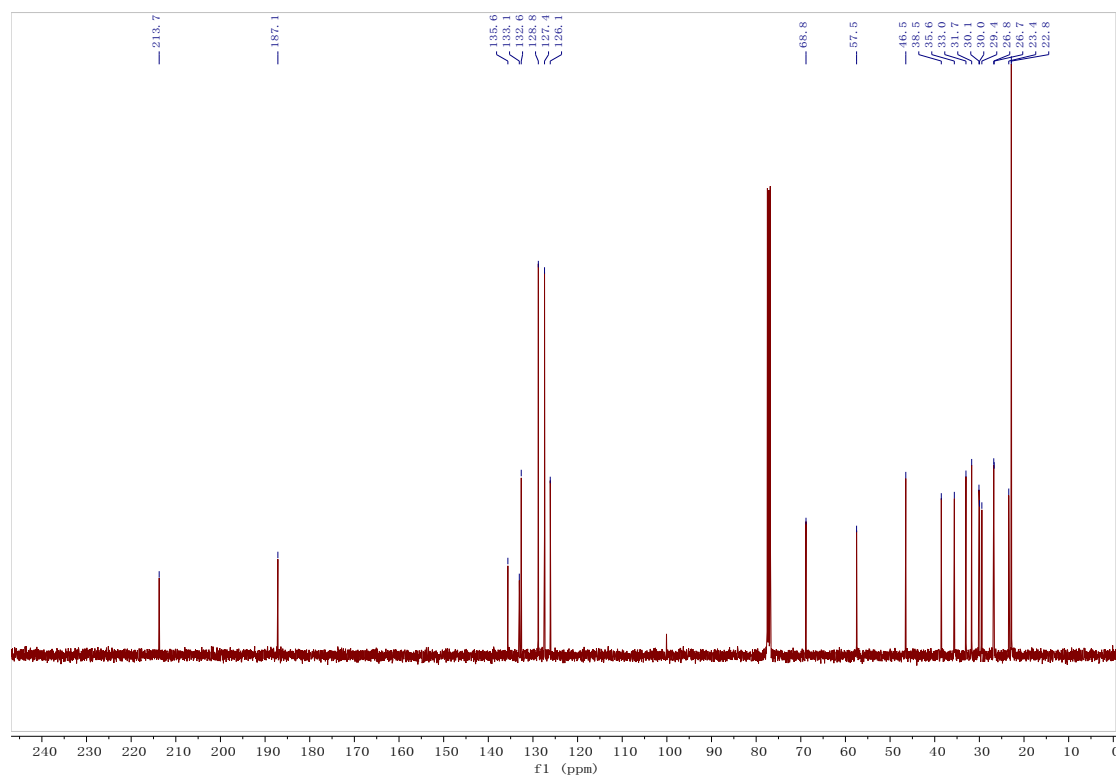

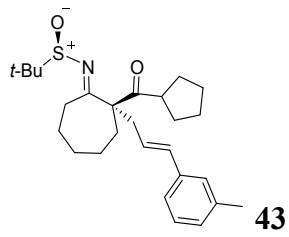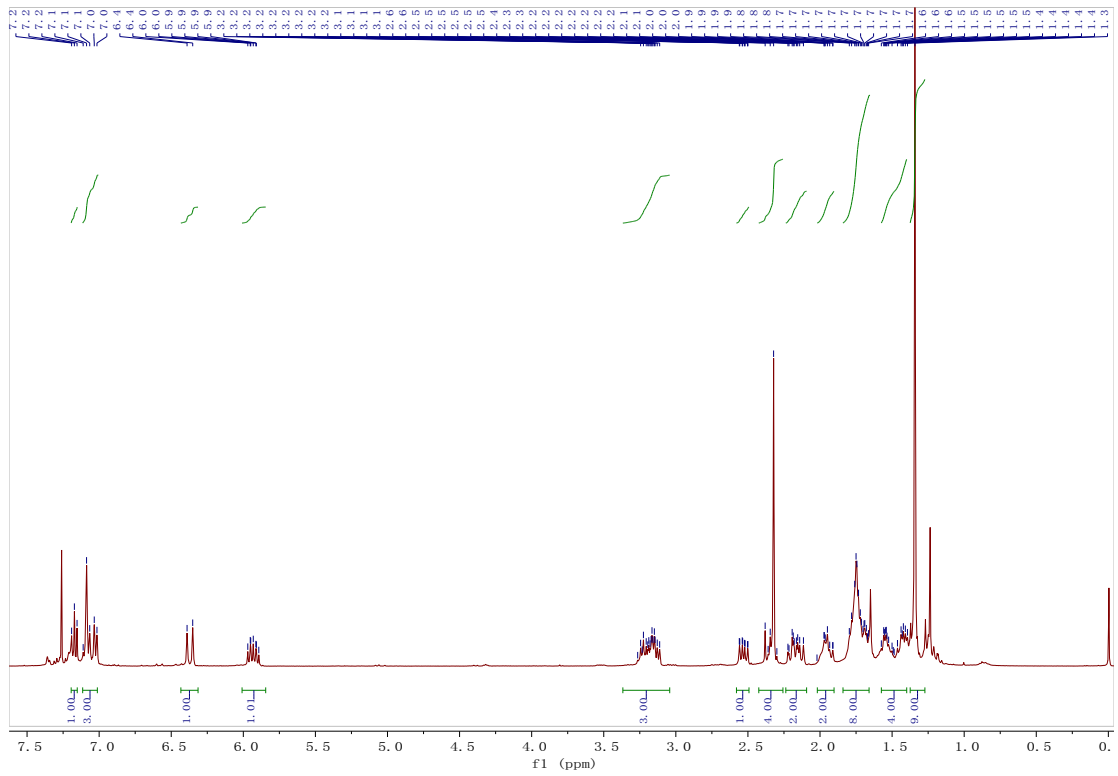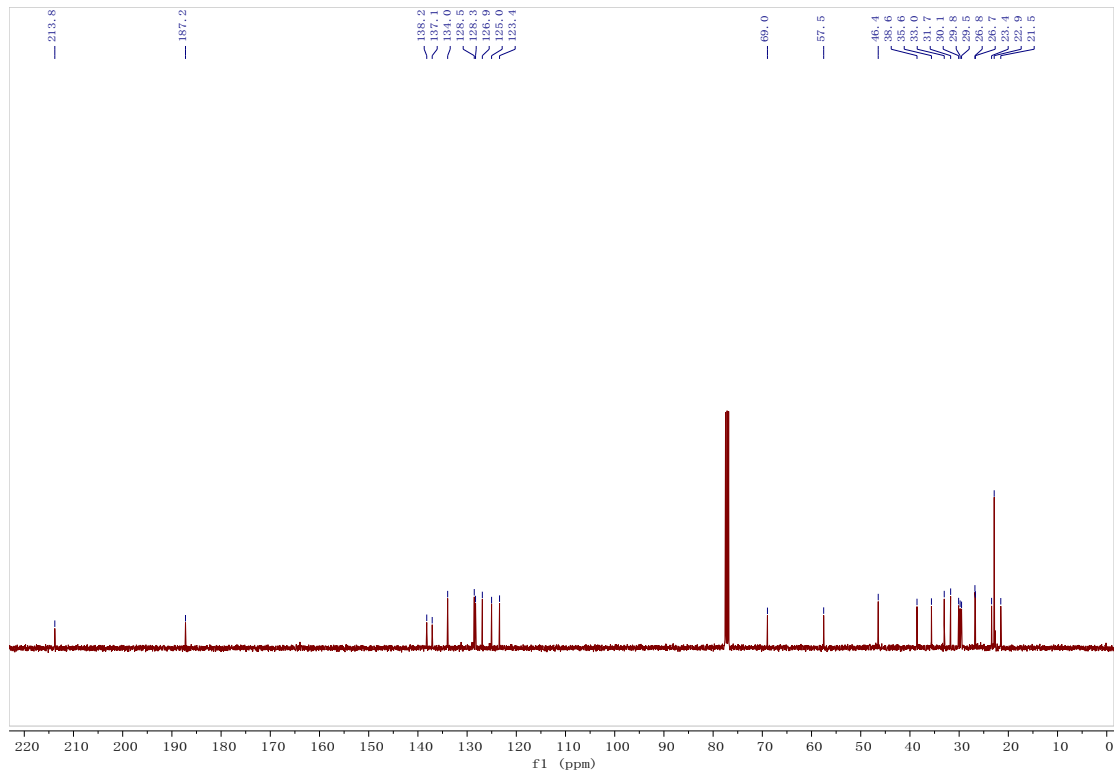

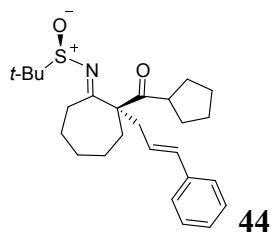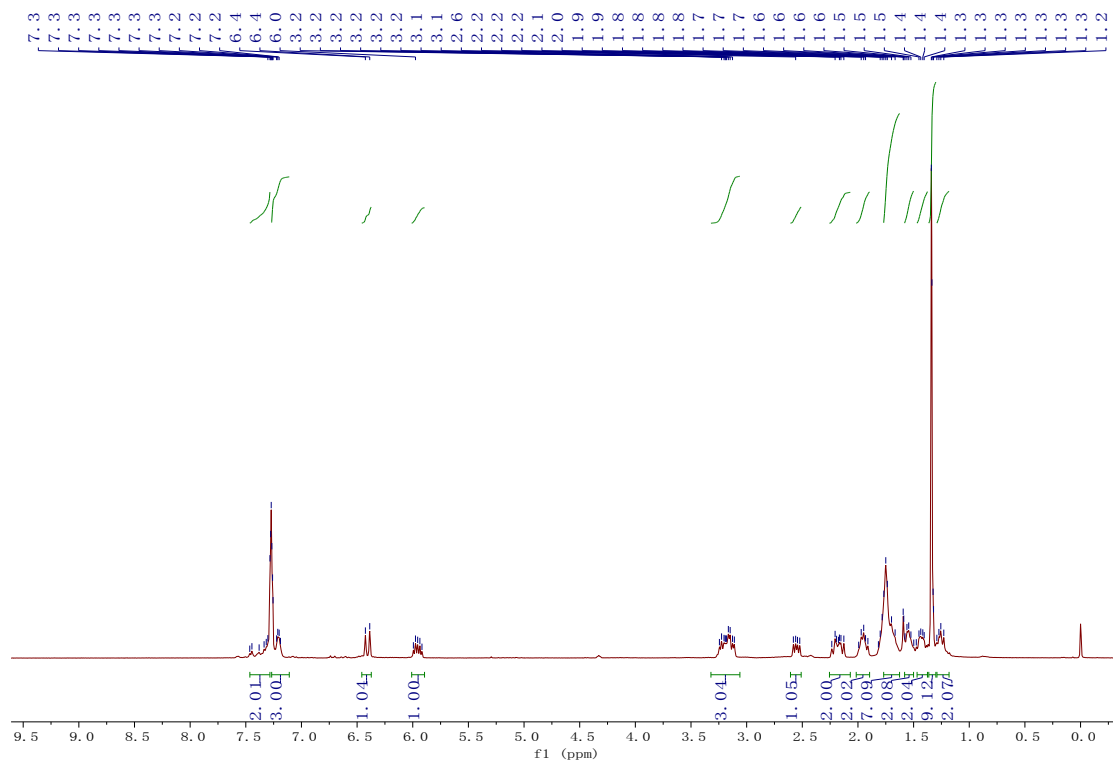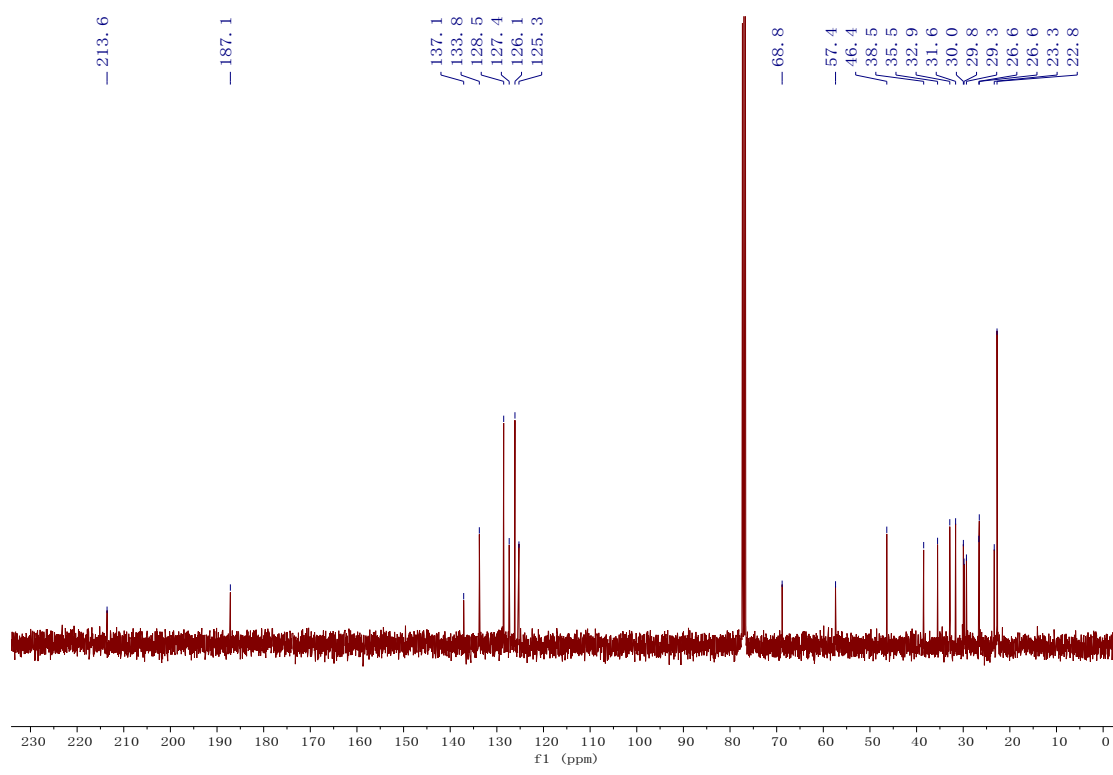

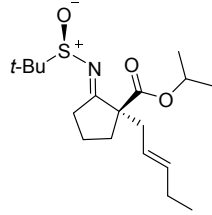

45

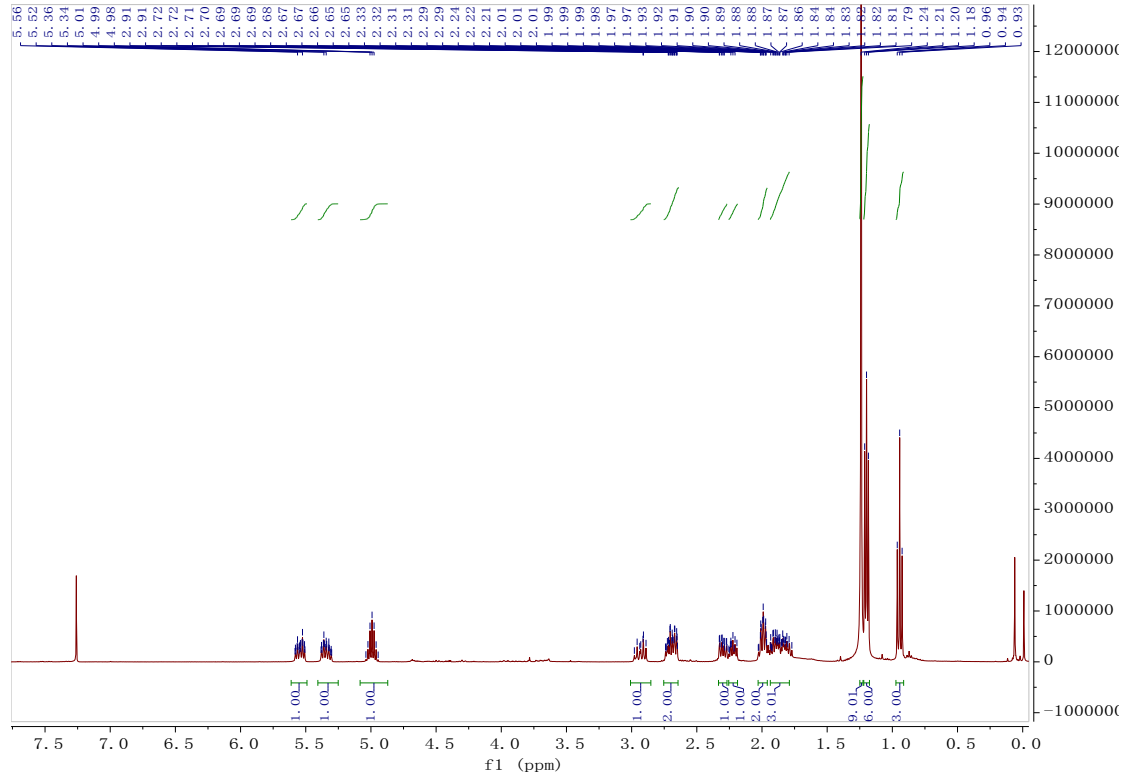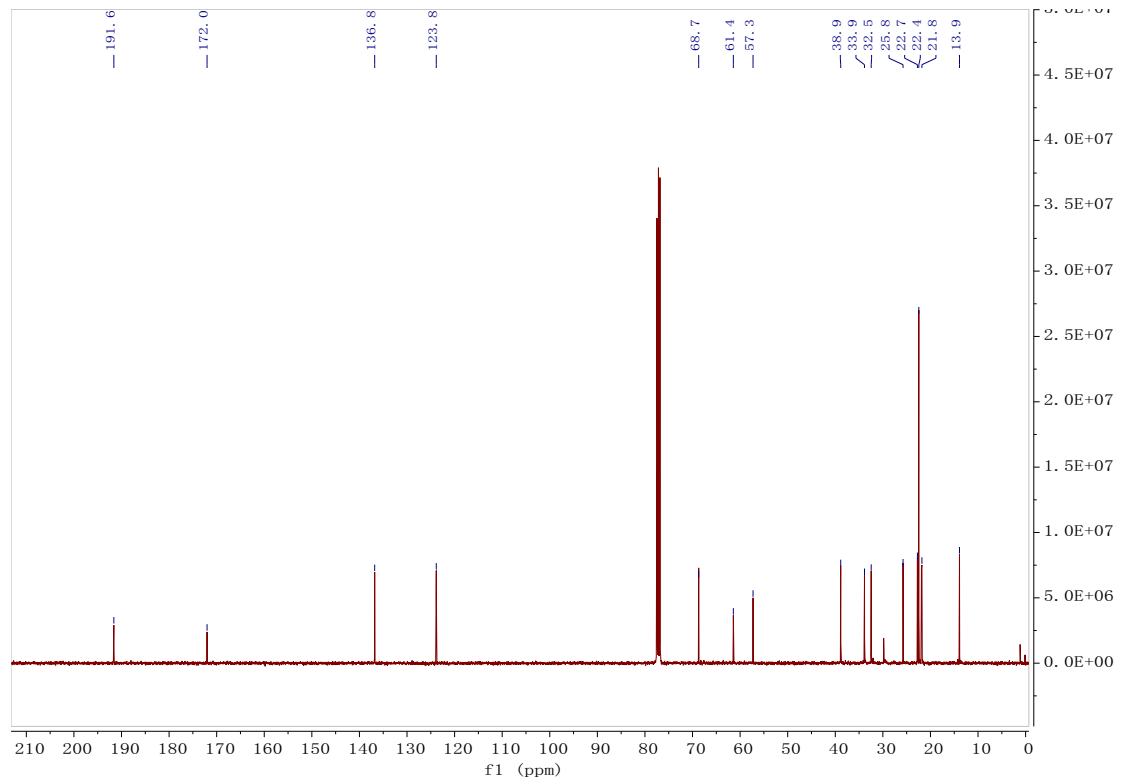



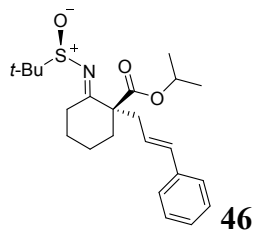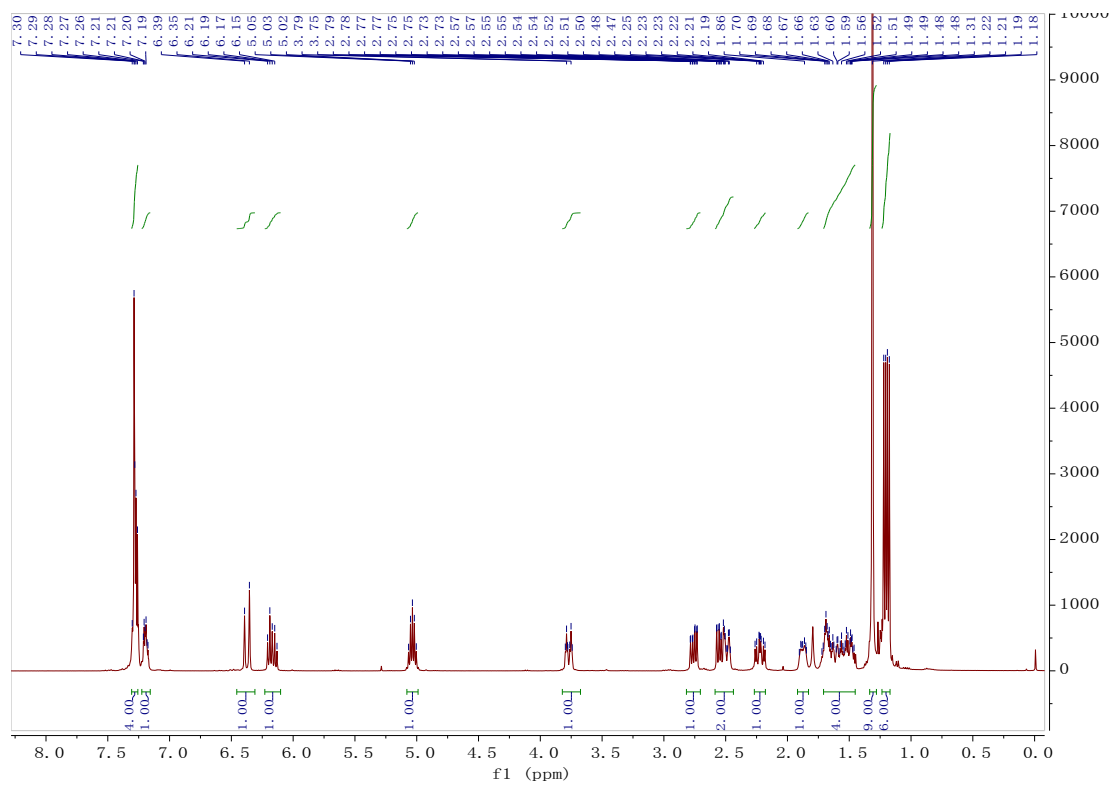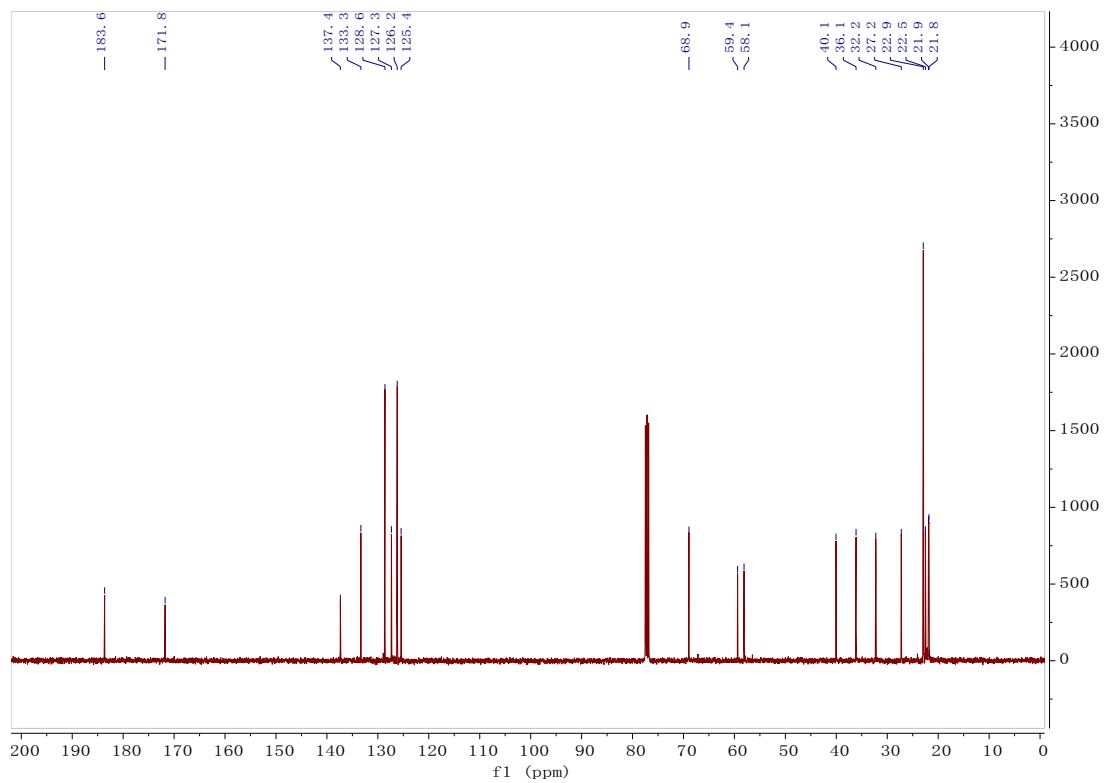

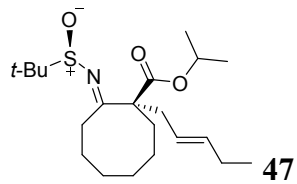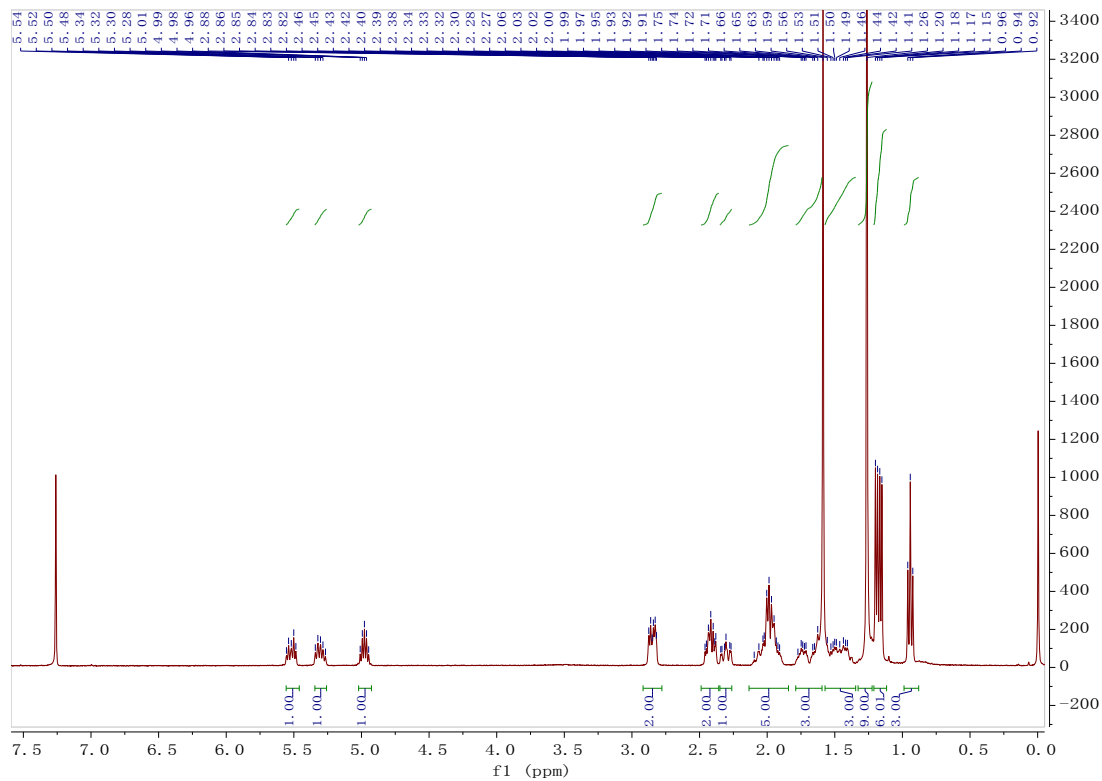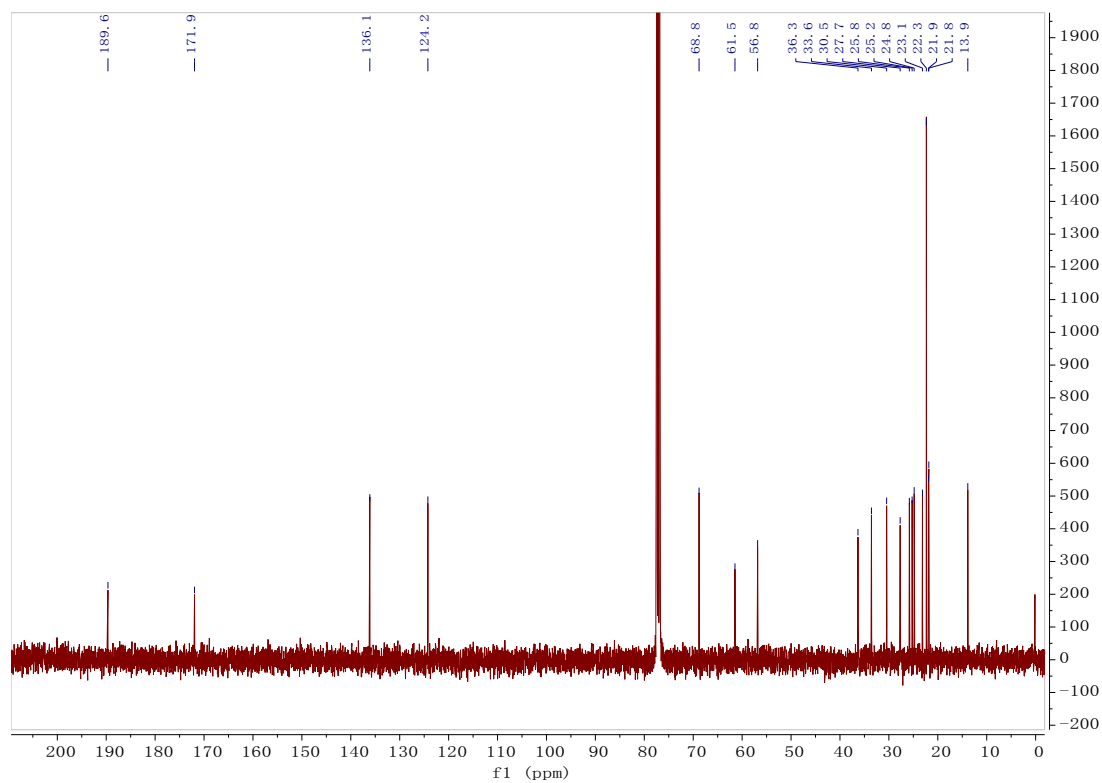

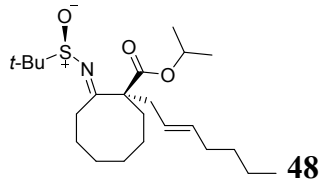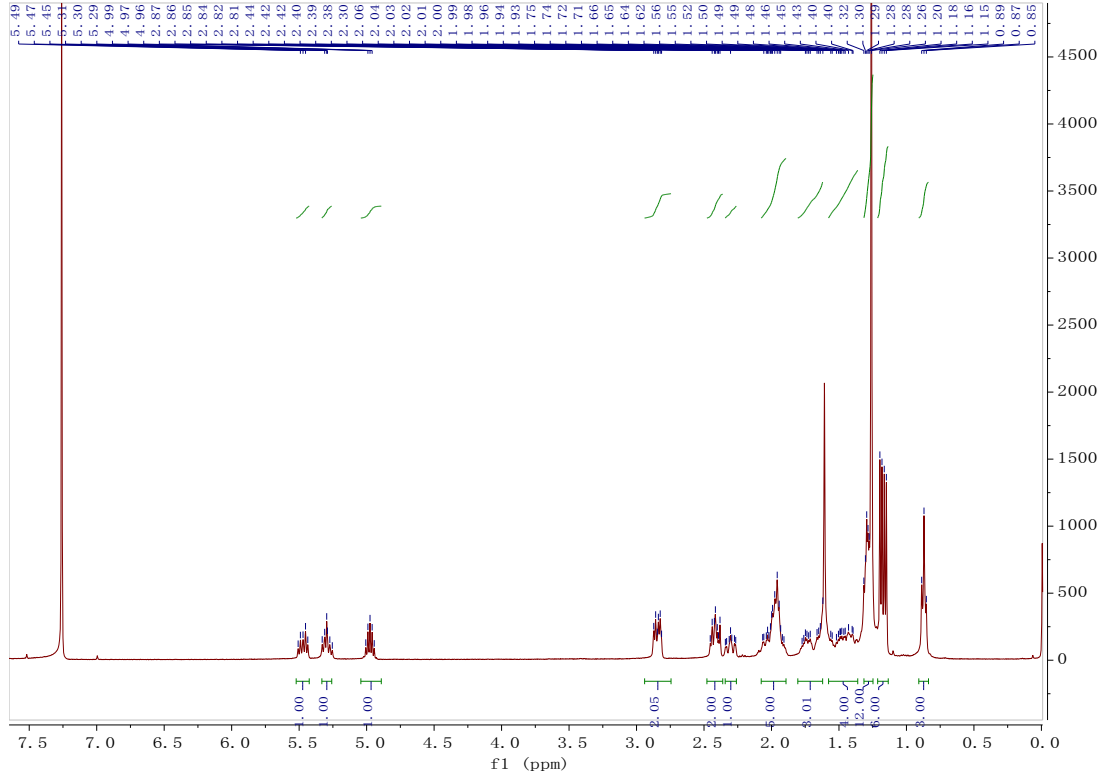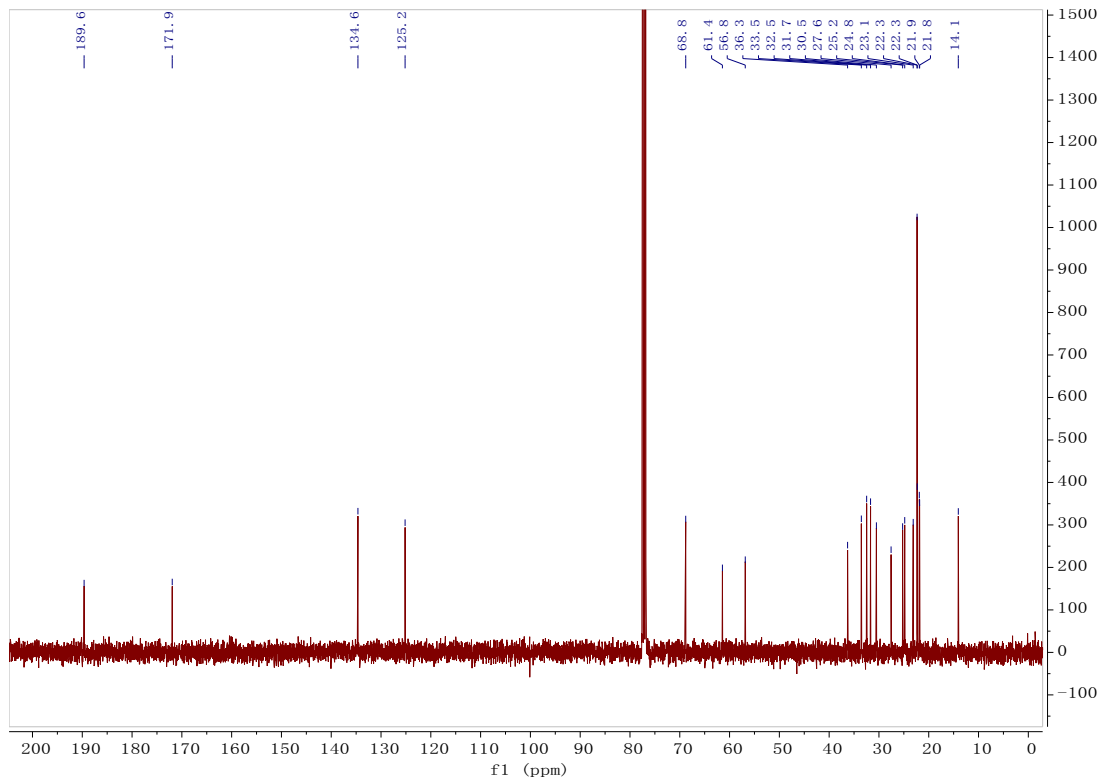

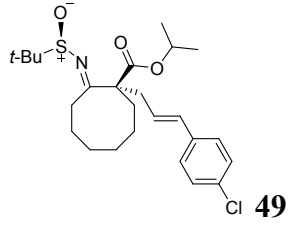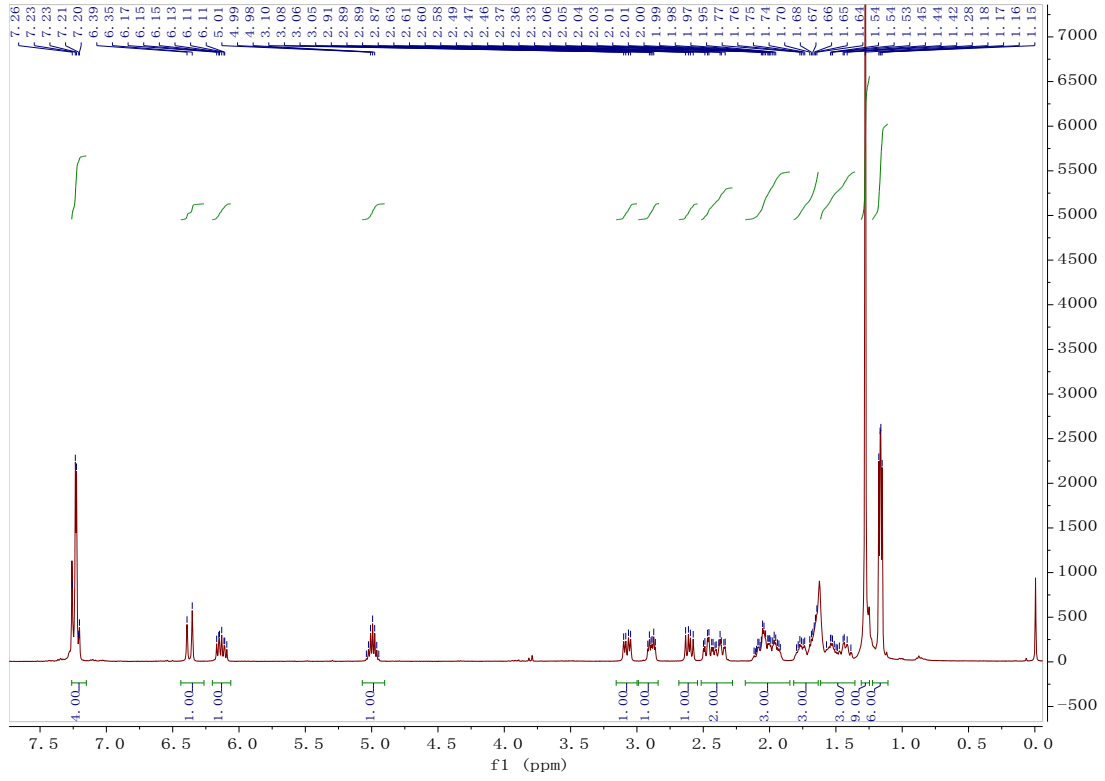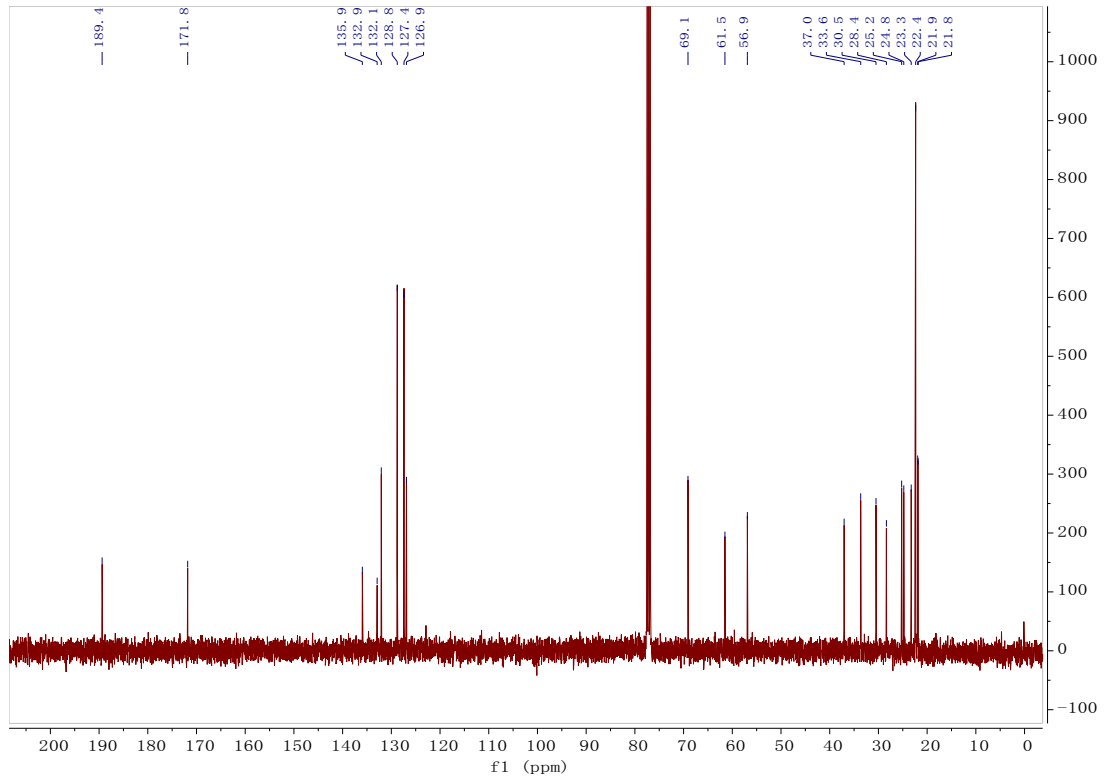

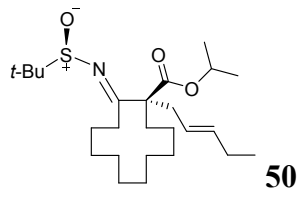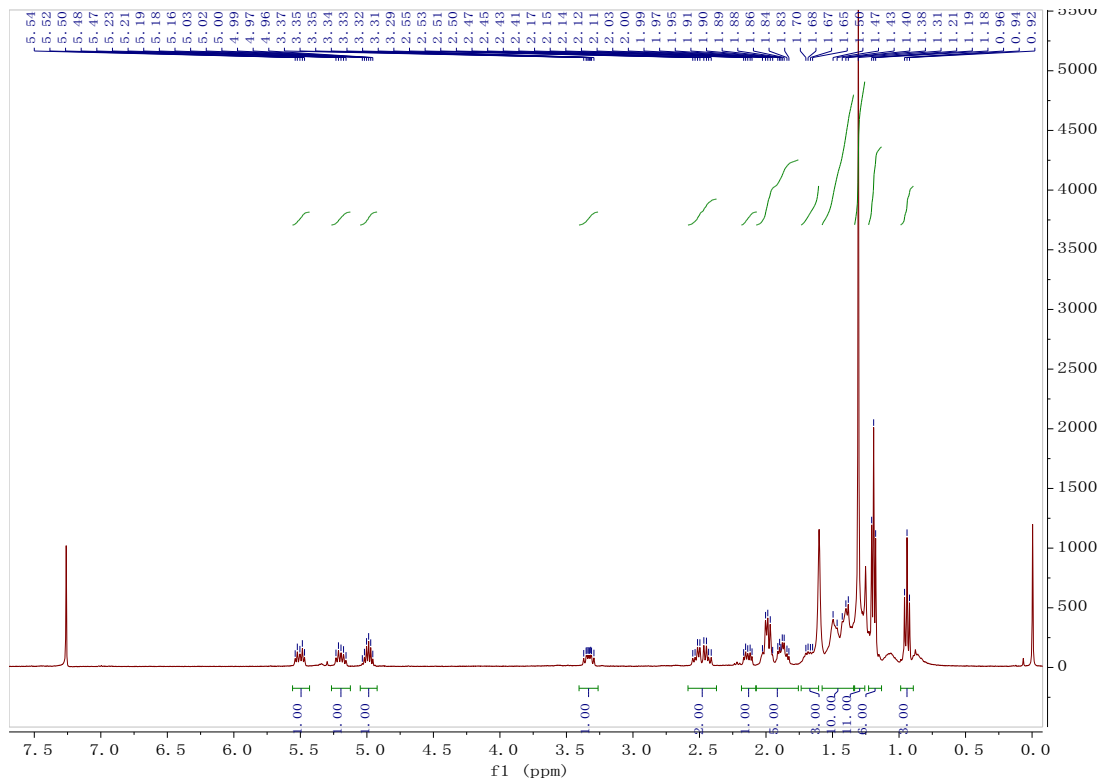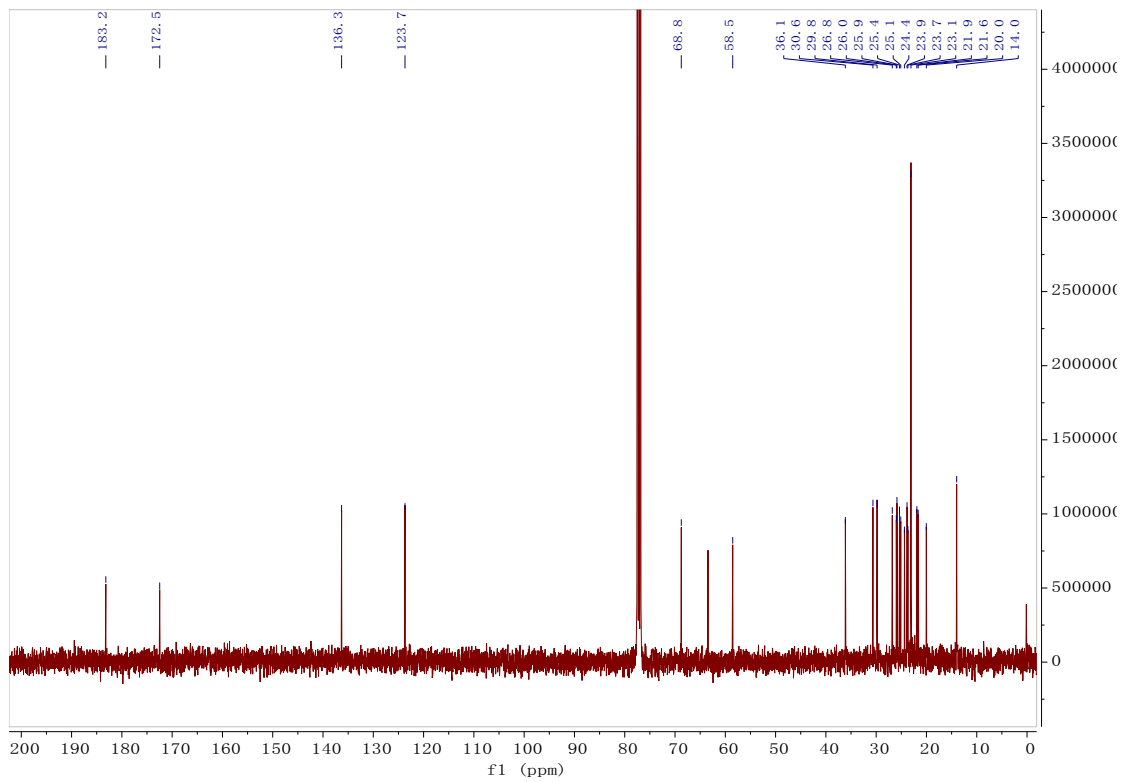

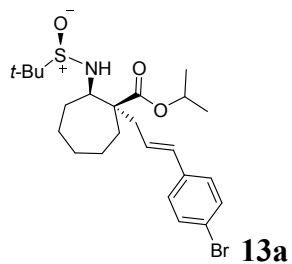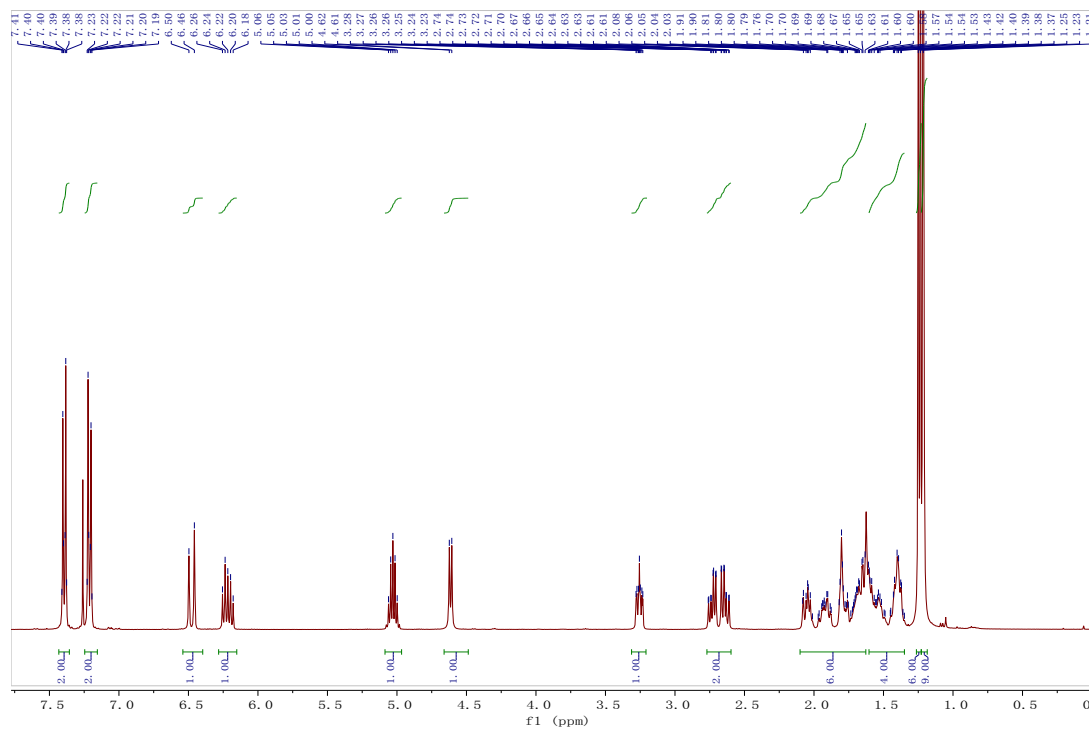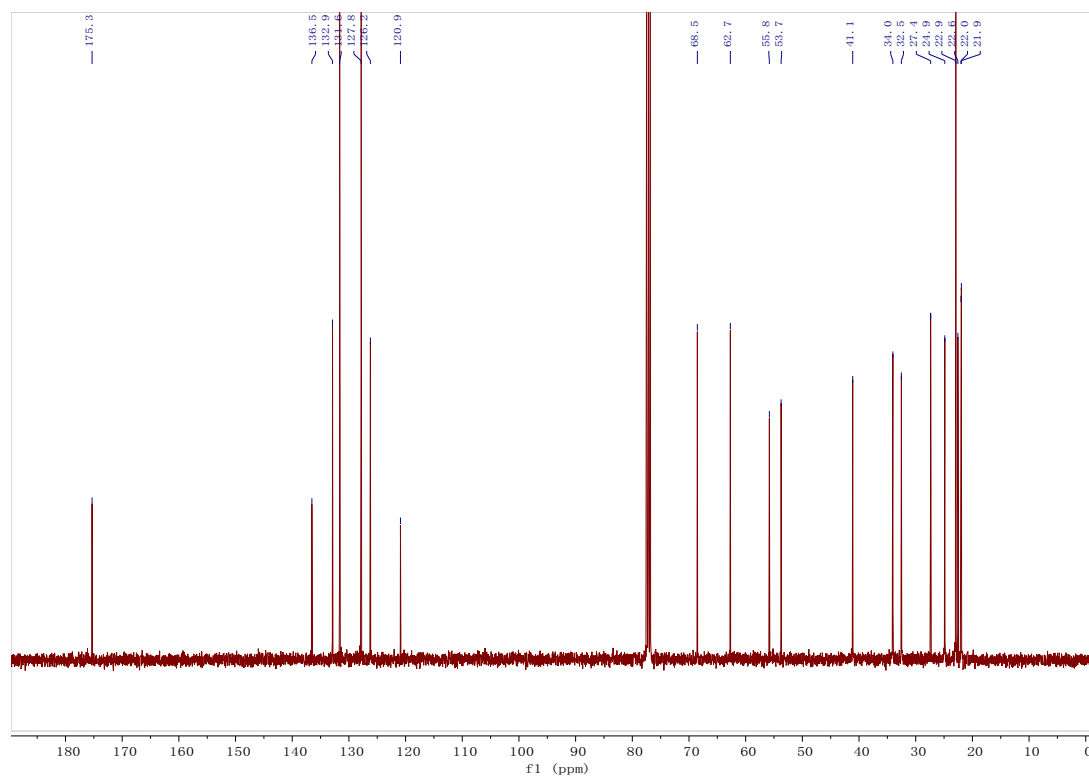

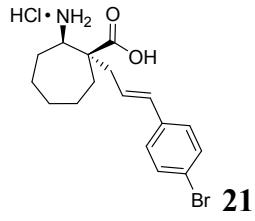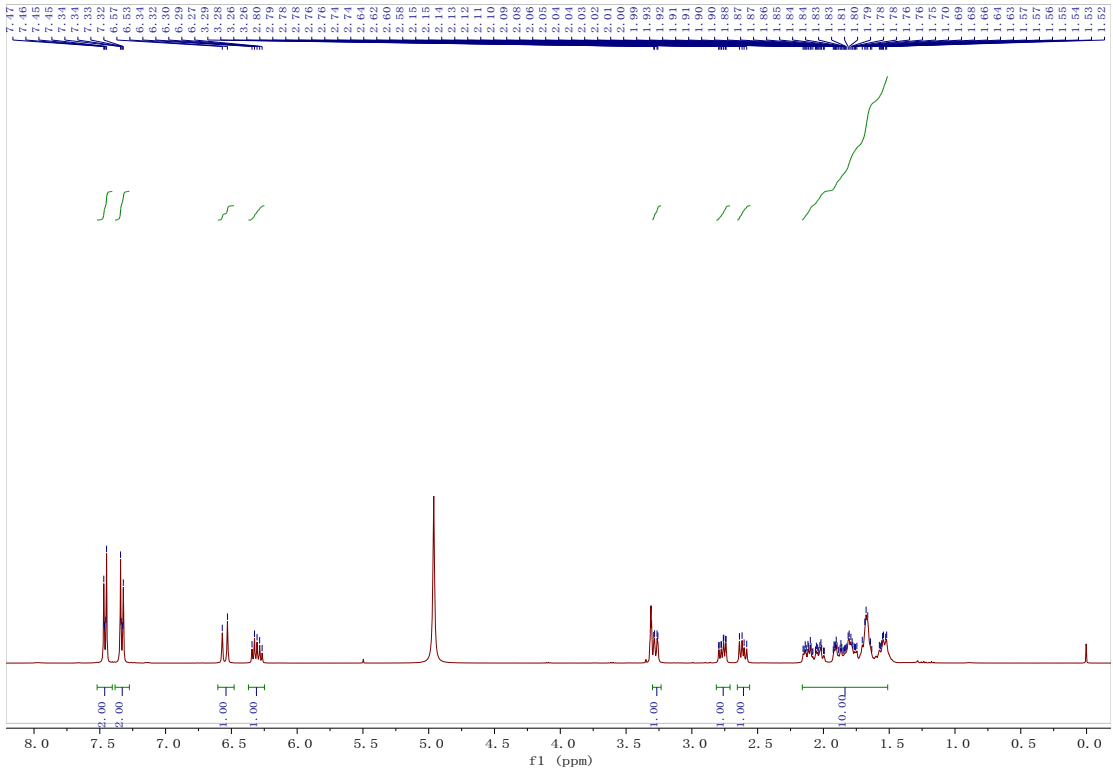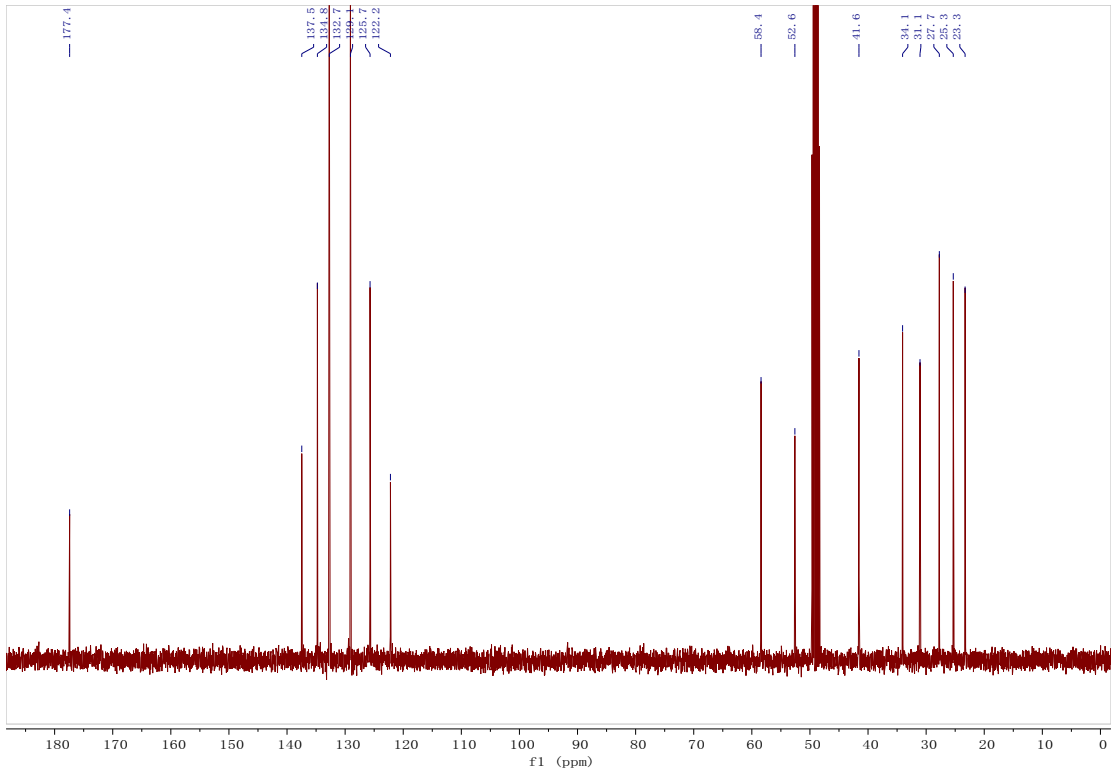

## 6. Crystal data of Compound 21

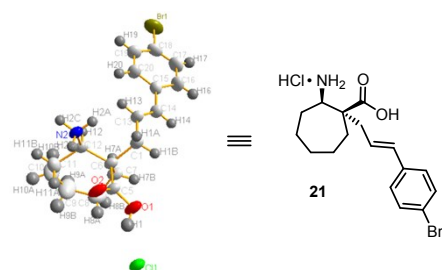

### Crystal data and structure refinement for 21.

|                                        |                                                                        |
|----------------------------------------|------------------------------------------------------------------------|
| Identification code                    | 21                                                                     |
| Empirical formula                      | C <sub>17</sub> H <sub>23</sub> BrClNO <sub>2</sub>                    |
| Formula weight                         | 480.86                                                                 |
| Temperature/K                          | 239(70)                                                                |
| Crystal system                         | monoclinic                                                             |
| Space group                            | P2 <sub>1</sub>                                                        |
| a/Å                                    | 10.6230(3)                                                             |
| b/Å                                    | 9.49924(19)                                                            |
| c/Å                                    | 13.5627(4)                                                             |
| $\alpha$ /°                            | 90                                                                     |
| $\beta$ /°                             | 103.281(3)                                                             |
| $\gamma$ /°                            | 90                                                                     |
| Volume/Å <sup>3</sup>                  | 1332.01(6)                                                             |
| Z                                      | 2                                                                      |
| $\rho_{\text{calc}}/\text{g/cm}^3$     | 1.199                                                                  |
| $\mu$ /mm <sup>-1</sup>                | 3.204                                                                  |
| F(000)                                 | 504.0                                                                  |
| Radiation                              | CuK $\alpha$ ( $\lambda$ = 1.54184)                                    |
| 2 $\Theta$ range for data collection/° | 6.696 to 148.466                                                       |
| Index ranges                           | -13 $\leq$ h $\leq$ 12, -11 $\leq$ k $\leq$ 11, -16 $\leq$ l $\leq$ 16 |
| Reflections collected                  | 25502                                                                  |
| Independent reflections                | 5141 [R <sub>int</sub> = 0.0508, R <sub>sigma</sub> = 0.0356]          |
| Data/restraints/parameters             | 5141/120/256                                                           |
| Goodness-of-fit on F <sup>2</sup>      | 1.034                                                                  |



---

|                                                |                                  |
|------------------------------------------------|----------------------------------|
| Final R indexes [ $I \geq 2 \sigma(I)$ ]       | $R_1 = 0.0709$ , $wR_2 = 0.2039$ |
| Final R indexes [all data]                     | $R_1 = 0.0764$ , $wR_2 = 0.2138$ |
| Largest diff. peak/hole / $e \text{ \AA}^{-3}$ | 0.91/-0.37                       |
| Flack parameter                                | -0.003(10)                       |
